# Supplementary material
Source: PubMed Central journal article supplement (PMC4126864)
Supplement: NIHMS569922-supplement-1.pdf [file NIHMS569922-supplement-1.pdf]

## Supplementary Information for

# Intracellular Calcium Regulates Nonsense-Mediated mRNA Decay

Andrew Nickless, Erin Jackson, Jayne Marasa, Patrick Nugent, Robert W. Mercer,  
David Piwnica-Worms, and Zhongsheng You

**Suppl. Fig. 1:** Design of the NMD Reporter System

**Suppl. Fig. 2:** Sequence annotation of the NMD reporter

**Suppl. Fig. 3:** Effects of CGs on general translation and cell viability

**Suppl. Fig. 4:** Effects of CGs on NMD

**Suppl. Fig. 5:** Expression levels of Na<sup>+</sup>/K<sup>+</sup>-ATPase  $\alpha$  subunit isoforms and mutants

**Suppl. Table 1:** Sequences of qPCR primers and results for the specificity of the CBR and CBG qPCR primers

**Suppl. Table 2:** Primary compound screen data

**Suppl. Table 3:** Candidate NMD enhancers that passed quartile analysis

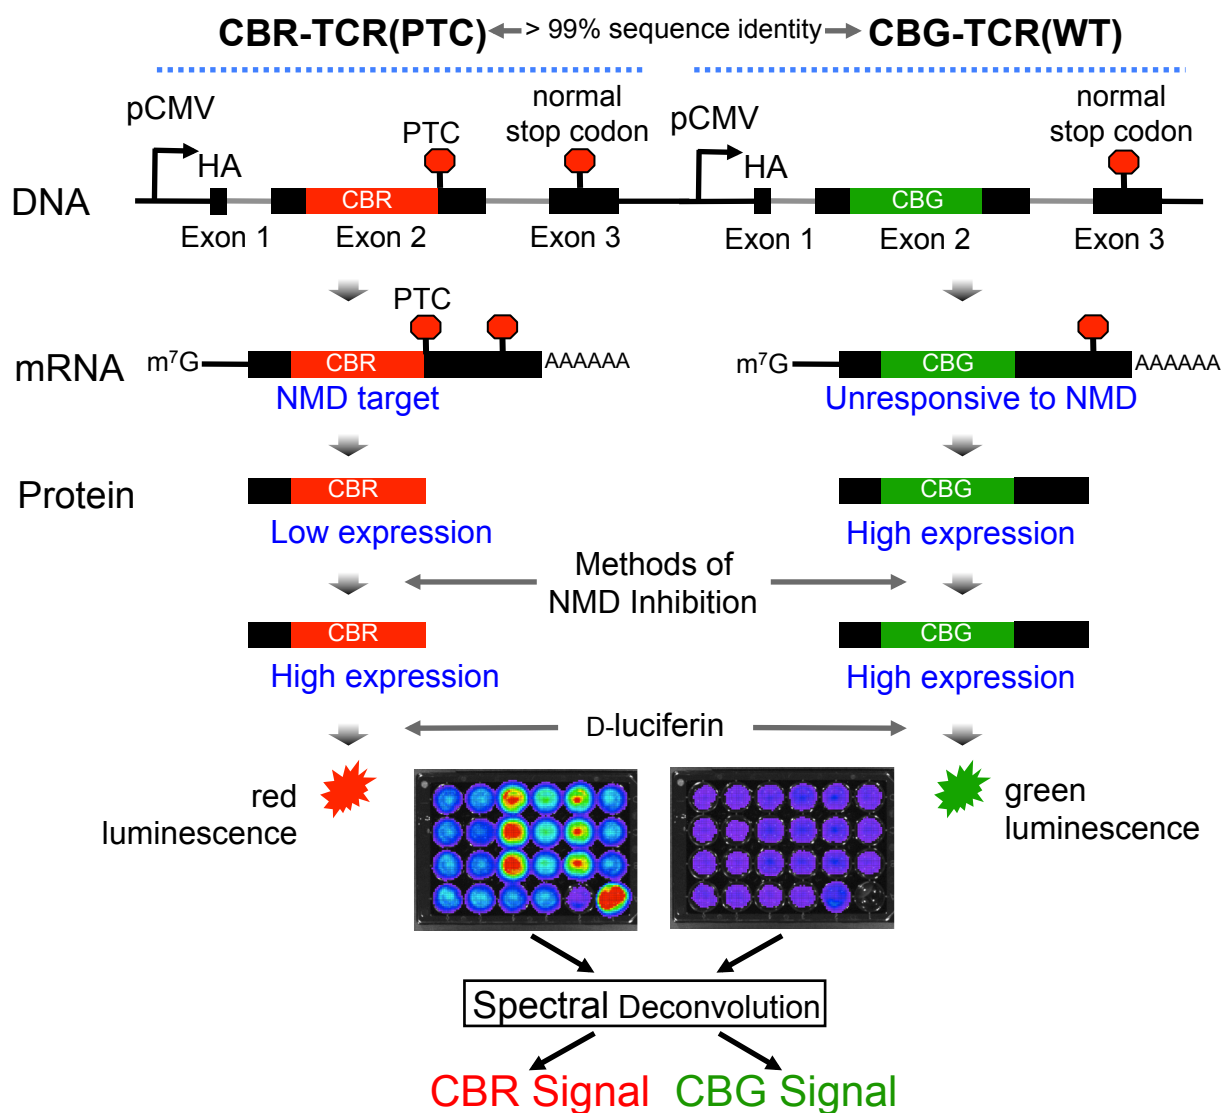

### Supplementary Figure 1. Design of the NMD reporter system.

Two highly homologous transcription units were inserted in tandem into the pBluescript SK(-) vector. In the first unit, the CBR ORF is inserted into the second exon of a TCR $\beta$  minigene. The stop codon of CBR is used as a PTC in the fusion reporter gene. In the second unit, the CBG99 ORF without a stop codon is inserted into the same position of the TCR $\beta$  minigene. Expression of both fusion reporter genes are controlled by separate CMV promoter and polyadenylation signals of identical sequences. The protein products of these two fusion reporter units in each cell are measured by rapid sequential bioluminescence imaging using proper red/green filters. After spectral deconvolution, the pure CBR and CBG bioluminescence signals are obtained, which reflect the steady-state mRNAs levels of the two fusion reporter genes. Inhibition of NMD (e.g., by addition of caffeine) would increase the CBR/CBG ratio. An HA-tag-encoding sequence inserted into the first exons of both reporter genes provides an independent strategy to measure the translation products of these two fusion reporter genes through Western blotting.

**Supplementary Figure 2. Annotation of the DNA sequence of the two tandem transcription units CBR-TCR(PTC) and CBG-TCR(WT) in the dual-colored bioluminescence NMD reporter.** The sequence of the pBluescript vector into which the reporter was inserted is not shown.

SacI GAGCTCTAGTTATTAATAGTAATCAATTACGGGGTCATTAGTTCATAGCCCATATATGGAGTTCCGCGTTACATAAATTACGGTAAATGGCCCGCCTGGCTGAC  
CGCCCAACGACCCCGCCATTGACGTCAATAATGACGTATGTTCCCATAGTAACGCCAATAGGGACTTTCATTGACGTCAATGGGTGGAGTATTTACGGTA  
AAGTCCCACTTGGCAGTACATCAAGTGTATCATATGCCAAGTACGCCCCCTATTGACGTCAATGACGGTAAATGGCCCGCCTGGCATTATGCCCAGTACATG  
CMV  
Promoter ACCTTATGGGACTTTCCTACTTGGCAGTACATCTACGTATTAGTCACTGCTATTACCATGGTGTATGCGGTTTTGGCAGTACATCAATGGCGTGGATAGCGGTT  
TGACTCACGGGATTTCCAAGTCTCCACCCATTGACGTCAATGGGAGTTTGTGTTTGGCACCAAAATCAACGGGACTTTCAAAAATGTCGTAACAACCTCCGCC  
CATTGACGCAAATGGCGGTAGGCGTGTACGGTGGGAGGCTATATAAGCAGAGCTGTTTTAGTGAACCGTCAGATCCGCTAGCCACCATTGGCCTACCCATA  
Exon 1  
(HA Tag) CGATGTTCCAGATTACGCTTCACTCGAACGCGTAAGTGAAGTCTGCTGAGGCGCACTGGTGTGCTTTCTTTTTTAGAATTCCTAAGTCTTTGCTAAGACGATA  
TGATCAGGCTTTGGCTTTCTTTATTACAGAACACATGGAGGCTGCAGTCAACCAAGTCCAAGAAGCAAGGTGGCAGTAAACAGGAGAAAGGTGACATTGAGC  
TGTCACCAGACTAATAACCATGACTATATGTACTGGTATCGGCAGGACACGGGGCATGGGCTGAGGCTGATCCATTACTCTCGACTGGTAAAGCGTGAGAAAA  
ATGTCACTATGGCCCTGAGCCTCTCCATCCTTTGGAGGATTTGACTGCCGGCGAAATGCTGTTTTCTGCTCTCCGCAAGCACTCTCATTGCTCAAGCCTTG  
GTCGATGTGGTCGGCGATGAATCTTTGAGCTACAAGGAGTTTTTTGAGGCAACCGTCTGCTGGCTCAGTCCCTCCACAATTGTGGCTACAAGATGAACGACG  
TCGTTAGTATCTGTGCTGAAAACAATACCCGTTTTCTCATTCCAGTCACTCGCCGCATGGTATATCGGTATGATCGTGGCTCCAGTCAACGAGAGCTACATCCC  
GACGAAGTGTAAAGTCATGGGTATCTCTAAGCCACAGATTGTCTTACCACCTAAGAATATTCTGAACAAAGTCTGGAAGTCCAAAGCCGACCAACTTTAT  
TAAGCGTATCATCTTTGGACACTGTGGAGAATATTCACGGTTGCGAATCTTTGCCTAATTTCTCTCTCGCTATTCAGACGGCAACATCGCAAACTTTAAACC  
ACTCCACTTCGACCCGTGGAACAAGTTGAGCCATTCTGTGTAGCAGCGGTAAGTACTGACTCCCAAGGAGTCAATGCAGACCCATCAAAACATTTGCGTG  
CGTCTGATCCATGCTCTCGATCCACGCTACGGCACTCAGTGATTCTGCTGTCACCGTCTTGGTCTACTTGCCTTTCTCCATGCTTTGGGCTTTTCAATTACT  
Exon 2  
(CBR(PTC)) TTGGTTACTTTATGGTCGGTCTCCGCGTATTATGTTCCGCCGTTTTGATCAGGAGGCTTTCTTGAAGCCATCCAAGATTATGAAGTCCGCGAGTGCATCAA  
CGTGCCTAGCGTGATCCTGTTTTGTCTAAGAGCCCACTCGTGACAAGTACGACTTGTCTTCACTGCGTGAATTGTGTTGCGGTGCCGCTCCACTGGCTAAG  
GAGGTCGCTGAAGTGGCCGCAACCGTTGAATCTTCCAGGATTCTGTTGGCTTCGGCCTCACCGAATCTACCAGTGCATTATCCAGACTCTCGGGAT  
GAGTTAAGAGCGGCTCTTTGGGCCGTGCACTCCACTCATGGCTGCTAAGATCGCTGATCGCGAAACTGGTAAGGCTTTGGGCCGAACCAAGTGGGCGAG  
CTGTGTATCAAAGGCCCTATGGTGAGCAAGGTTATGTCAATAACGTTGAAGTACCAAGGAGGCCATCGACGACGACGGCTGTTGCACTTCTGGTATTTTG  
GATATTACGACGAAGATGAGCATTTTTACGTCGTGGATCGTTACAAGGAGCTGATCAAATACAAGGTAGCCAGGTTGCTCCAGCTGAGTTGGAGGAGATTCT  
GTTGAAAAATCCATGCAATCGCGATGTCGCTGTGGTCCGATTCTGATCTGAGGCGCGGCAACTGCCTTCTGCTTTCTGTTGCAAGCAGCCTGGTACAGAA  
ATTACCGCCAAAGAAGTGTATGATTACCTGGTGAACGTGTGAGCCATACTAAGTACTTGCCTGGCGGCGTGCCTTTTGTGACTCCATCCCTCGTAACGTAAC

**PTC** AGGCAAAATTACCCGCAAGGAGCTGTTGAAACAATTGTTGGTGAAGGCCGGCGGTGATCTCGAGCATATGTCGCTGACAGCACGGAGAAAGGAGATATCCC

TGATGGGTACAAGGCCTCCAGACCAAGCAAGAGAATTTCTCTCATTCTGGAGTTGGCTTCCCTTCTCAGACAGCTGTATATTTCTGTCCAGCAGTCGGG

ACTGGGGGGCGGTGCAGAAACGCTGATTTTGGCTCAGGAACAGACTGACTGTTCTCGGTAAGTTGGGAGCTAGTAATGAAGGGGAGGAGCATTCCCA

GGCTAAGGATAGCCAGAGCCAGTTTTGTCTGTACCAAGAGGCTGTGAGTCAAACACCTTGTACTTTGGTGCGGGCACCCGACTATCGGTGCTAGGTAAGC

TGGGTATAGTTTTGTGTTGGTCTGGGGCTGTGAACCAAGACACCCAGTACTTTGGCCAGGCACTCGGCTCCTCGTGTAGTGAGCTGGGCCTGCT

TGCTTTTTCAGAACTCTCTCAGCCCTGAACCTTTCCAAATACAAATGATTTGTACCTGATCCAGACAGTTATCAGCAAAATACTAATCCACCTCTTTACTTT

CCAGAGGATCTGAGAAATGTGACTCCACCAAGGCTCCTGTTTGGCCATCAAAGCAGAGATTGCAAACAACAAAAGGCTACCCCTCGTGTCTTGGCCA

**Exon 3**

GGGGCTTCTCCCTGACCACCTTCTCGTTGACACCTTGACTCTGAAACAGACTAAATCAATAAAAACATGGAGTTCTGAAGCTTGCATGCCTGCAGCCCGG

GGATCCAGACATGATAAGATACATTGATGAGTGCGGCCGCGACTCTAGATCATAATCAGCCATACCAGATTTGTAGAGTTTTACTTGTCTTAAAAAACCTCCC

SV40  
polyadenylation  
Signal

ACACCTCCCCTGAACCTGAAACATAAAATGAATGCAATGTTGTTGTTAACTGTTTATTGCAGCTTATAATGGTTACAAATAAAGCAATAGCATCACAATTTCC

**Spe1**

ACAAATAAAGCATTTTTTCACTGCATTCTAGTTGTTGGTTTGTCCAAACTCATCAATGTATCTTAAGGCGTAAATGACTAGTTAATAAGTAATCAATTACGGG

GTCATTAGTTATAGCCATATATGGAGTTCGGGTTACATAACTTACGGTAAATGGCCCGCCTGGCTGACCGCCCAACGACCCCGCCATTGACGTCATA

ATGACGTATGTTCCATAGTAACGCCAATAGGGACTTTCCATTGACGTCAATGGTGGAGTATTACGGTAAACTGCCACTTGGCAGTACATCAAGTGATCA

CMV  
Promoter

TATGCCAAGTACGCCCTTATTGACGTCAATGACGGTAAATGGCCCGCCTGGCATTATGCCAGTACATGACCTTATGGGACTTTCCTACTTGGCAGTACATCT

ACGTATTAGTCATCGCTATTACCATGGTATGCGGTTTTGGCAGTACATCAATGGGCGTGGATAGCGGTTTACTCACGGGATTTCGAAGTCCACCCATT

GACGTCAATGGGAGTTGTTTTGGCACAAAATCAACGGGACTTTCCAAAATGTCGTAACAACTCCGCCCATGACGCAAATGGGCGTAGGCGTGTACGGT

GGGAGGCTATATAAGCAGAGCTGGTTTGTGAAACCGTACAGTCCGCTAGCCACCATGGCCTACCCATACGATGTTCCAGATTACGCTTCACTCGAACGCGTA

**Exon 1**  
**(HA Tag)**

AGTGAGTGTGGTCAGGCCACTGGTGTGCTTTCTTTTTTGAATTCTAAGTCTCTTTGCTAAGACGATATGATCAGGCTTTGGCTTTCTTTATTACAGAACAC

ATGGAGGCTGCAGTCACCCAAAGTCCAAGAAGCAAGTGGCAGTAACAGGAGGAAAGTGACATTGAGCTGTCACCAGACTAATAACCATGACTATATGACT

GGTATCGGCAGGACACGGGCATGGGCTGAGGCTGATCCATTACTCTCGACTCGACTGGTAAAGCGTGAGAAAAATGTCATCTATGGCCCTGAGCCTCTCC

ATCCTTTGGAGGATTGACTGCCGGCAAAATGCTGTTTCTGCTCTCCGCAAGCACTCTCATTGCTCAAGCCTTGGTCGATGTTGGTGGCGATGAATCTTT

GAGCTACAAGGAGTTTTTGGAGCAACCGTCTTGGTGGCTCAGTCCCTCCACAATTGTGGCTACAAGATGAACGACGTCGTTAGTATCTGTGCTGAAAAAATA

CCGTTTTCTTCAATCCAGTCATCGCCGATGGTATATCGGTATGATCGTGGCTCCAGTCAACGAGAGCTACATCCCGACGAAGTGTAAAGTCATGGGTATC

TCTAAGCCACAGATTGCTTCCACCACTAAGAATATTCTGAACAAAGTCTGGAAGTCCAAGCCGACCAACTTTAATGAGGTATCATCATCTTGGACTGTG

GAGAATATTACGGTTCGGAATCTTGCCTAATTCATCTCTCGCTAATCAGACGGCAACATCGCAAACCTTTAAACCACTCCACTTCGACCTGTGGAACAAGTT

**Exon 2**  
**(CBG(WT))**

GCAGCCATTCTGTAGCAGCGGTACTACTGGACTCCCAAAGGAGTATGCAGACCCATCAAACATTTGCGTGGCTGATCCATGCTCTCGATCCACGGC

TGGCACTCAGCTGATFCTGGTGTACCGTCTTGGTCTACTTGCCTTCTCCATGCTTTCGGCTTTAGCATTCTTTGGTTACTTTATGGTGGTCTCCGC

GTGATTATGTTCCGCCGTTTTGATCAGGAGGCTTTCTTGAAGCCATCCAAGATTATGAAGTCCGCAAGTGCATCAACGTGCCTAGCGTGATCCTGTTTTGTG  
TAAGAGCCCACTCGTGGACAAGTACGACTTGTCTTCACTGCGTGAATTGTGTTGCGGTGCCGCTCCACTGGCTAAGGAGGTCGCTGAAGTGGCCGCAAACG  
CTTGAATCTCCAGGGATTGTTGTGGCTTCGGCCTACCGAATCTACCAGCGCTAACATTCACCTCTCTCGGGATGAGTTAAGAGCGGCTTTTGGGCCG  
GCTACTCCACTCATGGCTGCTAAGATCGTGATCGCGAAACTGGTAAGGCTTTGGGCCGAACCAAGTGGGCGAGCTGTGTATCAAAGGCCCTATGGTGAGC  
AAGGGTTATGTCAATAACGTTGAAGCTACCAAGGAGGCCATCGACGACGACGGCTGGTTGCATTCTGGTGATTTTGGATATTACGACGAAGTGAACATTTTA  
CGTCGTGGATCGTTACAAGGAGCTGATCAAATACAAGGGTAGCCAGGTTGCTCCAGCTGAGTTGGAGGAGATTCTGTTGAAAAATCCATGCATTCGCGATGC  
GCTGTGGTCGGCATTCTGATCTGGAGGCCGGCGAACTGCCTTCTGCTTTCGTTGTCAAGCAGCCTGGTAAGAAATTACCGCAAAGAAGTGATGATTACC  
TGGCTGAACGTGTGAGCCATACTAAGTACTTTCGCTGGCGGCGTGCCTTTTGTGACTCCATCCCTCGTAACGTAACAGGCAAATACCGCAAAGGAGCTGTT  
GAAACAATTGTTGGAGAAGGCCGGGTTCTCGAGCATATGTCGCTGACAGCACGGAGAAAGGAGATATCCCTGATGGGTACAAGGCTCCAGACCAAGCCA  
AGAGAATTCTCTCATTCTGGAGTTGGCTTCCCTTCTCAGACAGCTGTATATTCTGTGCCAGCAGTCGGGACTGGGGGGCGGTGCAGAAACGCTGTAT  
TTGGCTCAGGAACCAGACTGACTGTTCTCGGTAAGTTGGGAGCTAGTAATGAAGGGGAGGGAGCATTCCAGGCTAAGGATAGCCAGAGCCAGTTTTTGTG  
CTGTACCAAGAGGCTGTGAGTCAAAACACCTTGTACTTTGGTGCGGCACCCGACTATCGGTGCTAGGTAAGCTGGGGTATAGTTTTTGTGTTGGTCTGGG  
GCTGTGAACCAAGACACCCAGTACTTTGGCCAGGCACTCGGCTCCTCGTGTAGGTGAGCTGGGGCTGCTTGTCTTTTCAGAACTCTCTCAGCCCTGAAC  
CTTTCAAATACAAATGATTGTACCTGATCCAGACAGTTATCAGCAAAATACTAATCCACCTCTTTACTTTCCAGAGGATCTGAGAAATGTACTCCACCCA  
AGGTCTCCTGTTTGGCCATCAAAGCAGAGATTGCAAAACAAACAAAGGCTACCCTCGTGTGCTTGGCCAGGGGCTTCTCCCTGACCACCTCCTCGTTG  
ACACCTTGACTCTGAAACAGACTAAATCAATAAAAAACATGGAGTTCTGAAGCTTGCATGCCTGCAGCCCGGGGATCCAGACATGATAAGATACATTGATGAGT  
GCGGCCGCGACTCTAGATCATAATCAGCCATACCACATTTGTAGAGTTTTACTTGTCTTAAAAAACCTCCACACCTCCCTGAACTGAAACATAAAATGA  
ATGCAATTGTTGTTAACTTGTATAATGCTTATAATGGTTACAATAAAGCAATAGCATCACAATTCACAATAAAGCATTTTTTTCACTGCATTCTAGT  
TGTGGTTTGTCCAACTCATCAATGTATCTTAAGGCGTAAATTGGGTACC

Exon 3

SV40  
polyadenylation  
Signal

Kpn1

**a**

DMSO Ouabain DMSO Ouabain

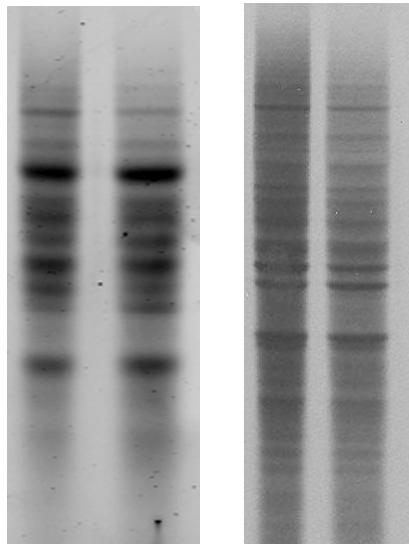Coomassie  
staining<sup>35</sup>S-Methionine  
autoradiography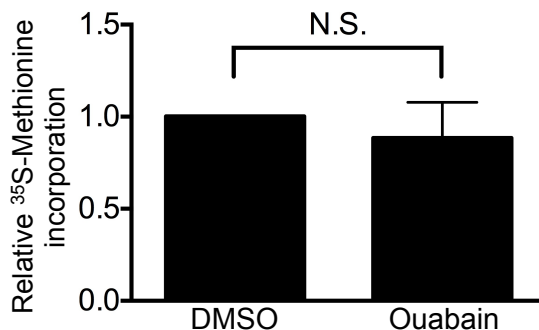**b**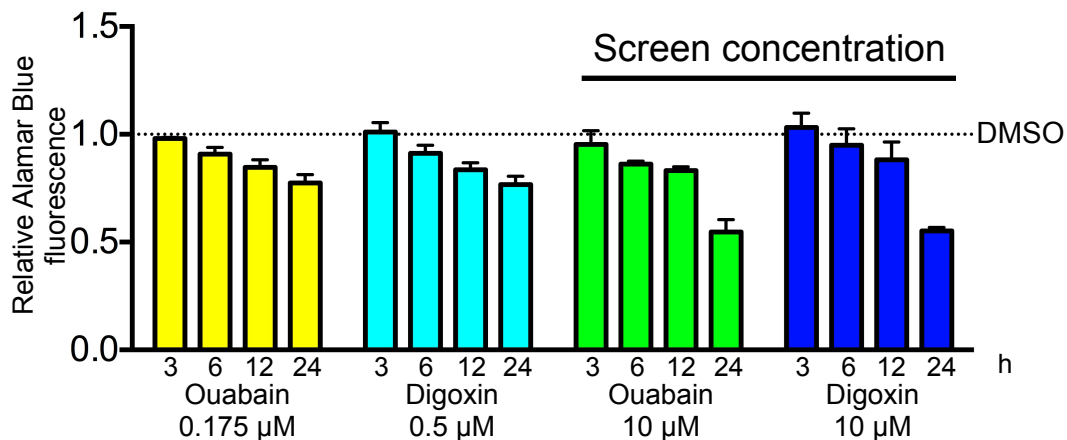**Supplementary Figure 3. Effects of CGs on general translation and cell viability.**

(a) Effects of ouabain on general translation. Left panel: representative images of Coomassie blue staining of total proteins and <sup>35</sup>S-methionine incorporation in newly synthesized proteins in the NMD reporter cells treated with DMSO or ouabain. Right panel: quantified results for <sup>35</sup>S-methionine incorporation in cells treated with DMSO or ouabain. Data represent the mean ± SD of three independent experiments. The signal in DMSO-treated cells was normalized to 1.

(b) Effects of ouabain on cell viability. AlamarBlue fluorescence levels in NMD U2OS reporter cells treated with DMSO, ouabain or digoxin for 3, 6, 12, or 24 h. Data represent the mean ± SD of three independent experiments. The fluorescence in DMSO-treated cells was normalized to 1.

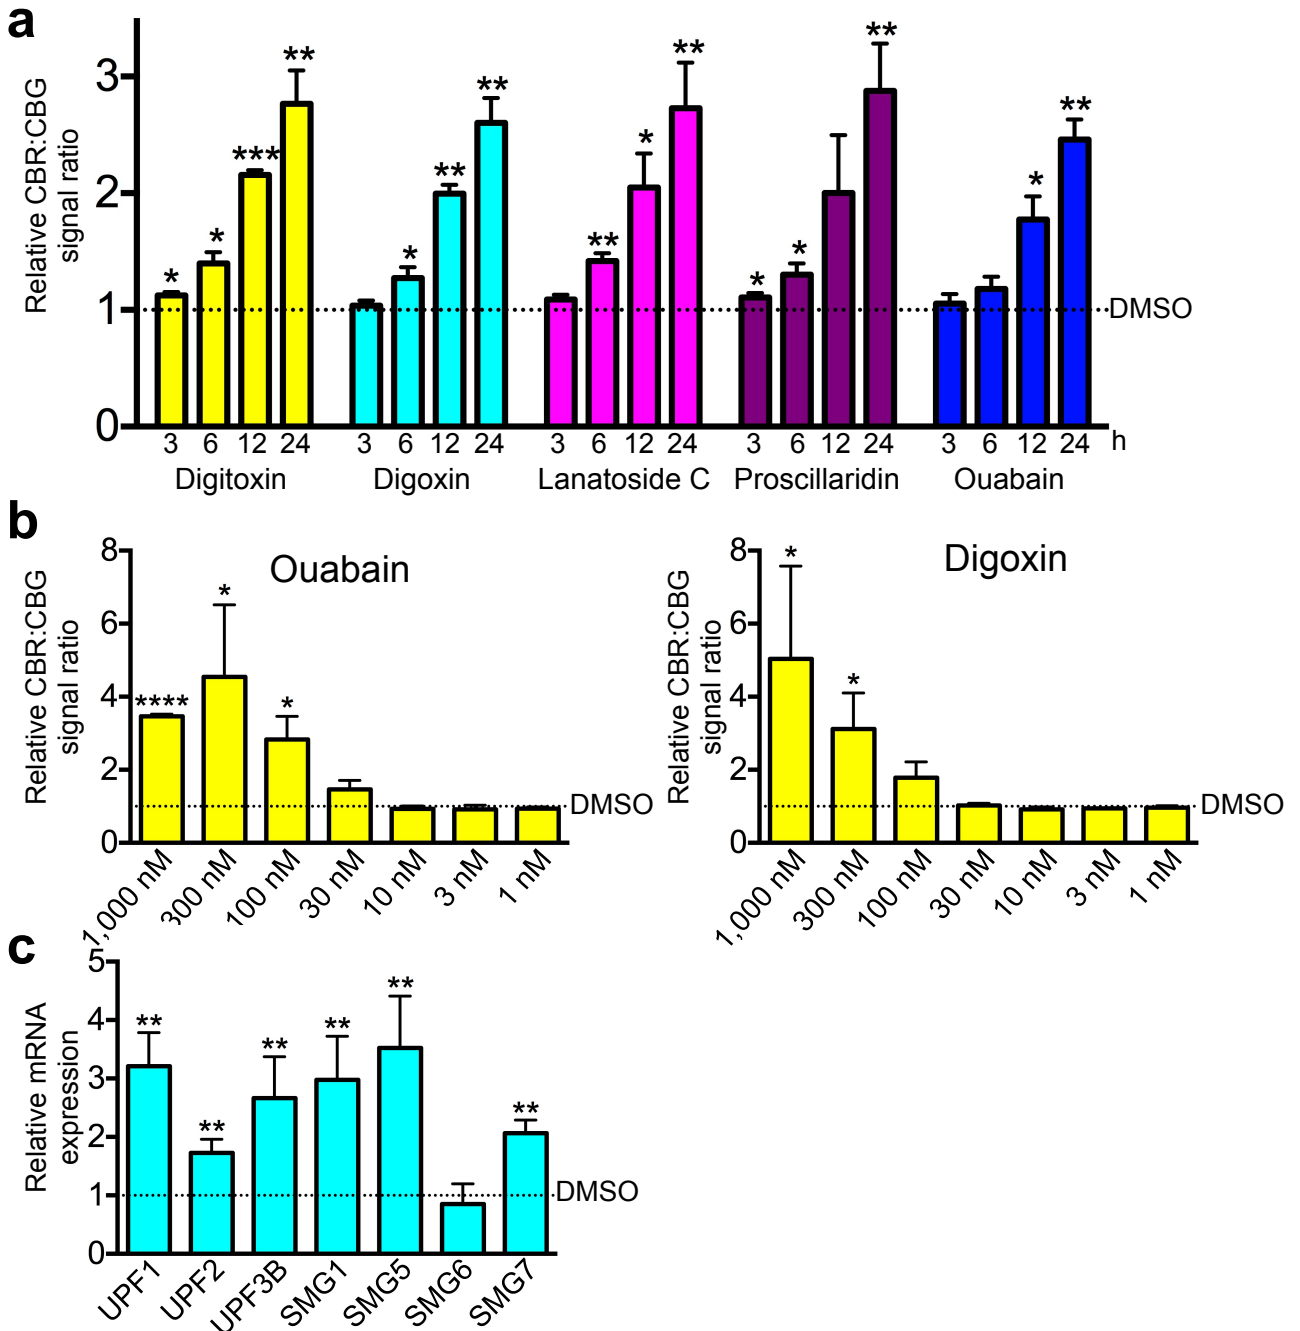

**Supplementary Figure 4. Effects of cardiac glycosides on NMD.**

(a) Ratios of CBR/ CBG bioluminescence signals in NMD reporter cells treated with DMSO or cardiac glycosides for 3, 6, 12, or 24 h at the indicated concentrations. Data represent the mean  $\pm$  SD of three independent experiments. The ratio in DMSO-treated cells was normalized to 1.

(b) Ratios of CBR/ CBG bioluminescence signals in NMD reporter cells treated with various concentration of ouabain and digoxin for 24 h. Data represent the mean  $\pm$  SD of three independent experiments. The ratio in DMSO-treated cells was normalized to 1.

(c) Results of qPCR analysis of NMD factor mRNAs in NMD reporter cells treated with DMSO or ouabain for 24 h. Data represent the mean  $\pm$  SD of four independent experiments. The mRNA expression in DMSO-treated cells was normalized to 1.

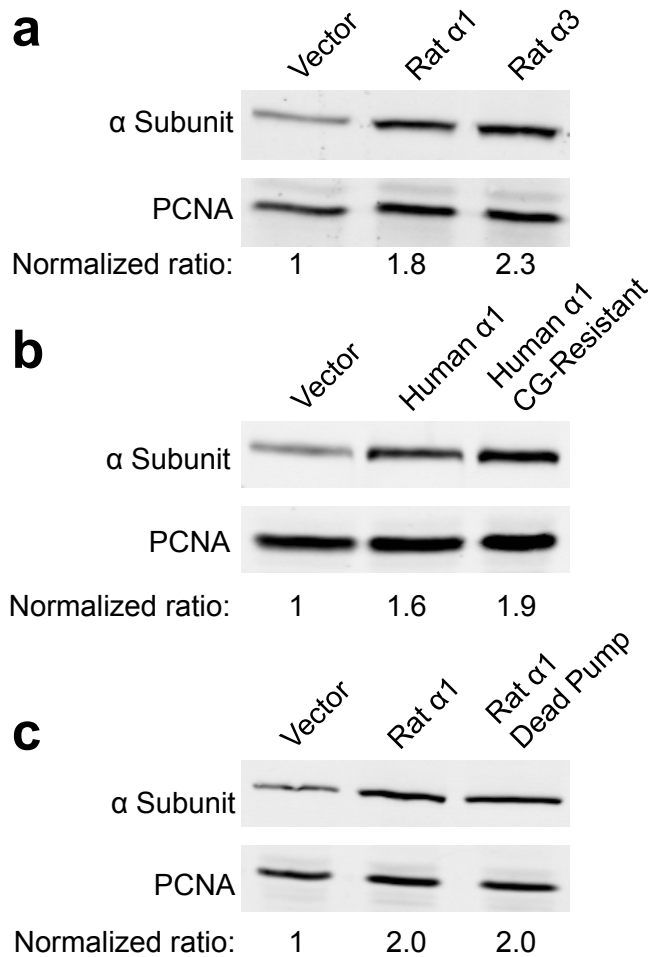

**Supplementary Figure 5. Expression levels of Na<sup>+</sup>/K<sup>+</sup>-ATPase  $\alpha$  subunit isoforms and mutants.**

(a) Related to **Fig. 4b**. Levels of all  $\alpha$  subunits of Na<sup>+</sup>/K<sup>+</sup>-ATPase in human U2OS reporter cells transfected with empty vector, rat  $\alpha 1$  subunit or rat  $\alpha 3$  subunit of Na<sup>+</sup>/K<sup>+</sup>-ATPase.

(b) Related to **Fig. 4c**. Levels of all  $\alpha$  subunits of Na<sup>+</sup>/K<sup>+</sup>-ATPase in human U2OS reporter cells transfected with empty vector, human  $\alpha 1$  subunit, or CG-resistant mutant human  $\alpha 1$  subunit of Na<sup>+</sup>/K<sup>+</sup>-ATPase.

(c) Related to **Fig. 4d**. Levels of all  $\alpha$  subunits of Na<sup>+</sup>/K<sup>+</sup>-ATPase in human U2OS reporter cells transfected with empty vector, rat  $\alpha 1$  subunit, or catalytically-inactive rat  $\alpha 1$  subunit of Na<sup>+</sup>/K<sup>+</sup>-ATPase.

Protein levels of  $\alpha$  subunits of Na<sup>+</sup>/K<sup>+</sup>-ATPase were determined by a pan-Na<sup>+</sup>/K<sup>+</sup>-ATPase antibody that recognizes all  $\alpha$  isoforms from both human and rat. Normalized expression levels relative to a house-keeping protein PCNA were quantified using Odyssey (Li-Cor) software.



**a**

| Name    | Sequence                |
|---------|-------------------------|
| CBG99-F | ATGCTCTCGATCCACGCGTG    |
| CBG99-R | CGAGAGAGTGAATGTTAGCG    |
| CBR-F   | TCCATGCTTTCGGCTTTCAT    |
| CBR-R   | CGAGAGTCTGGATAATCGCA    |
| p53-F   | GAGGTTGGCTCTGACTGTACC   |
| p53-R   | TCCGTCCCAGTAGATTACCAC   |
| UPP1-F  | CCAGCCTTGTTGGAGATGT     |
| UPP1-R  | ACATGGCATAGCGGTCAGTT    |
| ATF4-F  | ATGTCCCCCTTCGACCA       |
| ATF4-R  | CCATTTTCTCCAACATCCAATC  |
| Pim3-F  | GCACCCGACATTAAGGAC      |
| Pim3-R  | TCCCCACACACCATATCGTAG   |
| Pisd-F  | TCCCTGATGTCAGTGAACCCT   |
| Pisd-R  | TGGTGTGCGTCACGAAGC      |
| ORCL-F  | GGCAGCAGATGAAATCTGAA    |
| ORCL-R  | TCCAGAATGTGATTTTTGCAG   |
| UPF1-F  | CCCTCCAGAATGGTGTCACT    |
| UPF1-R  | CTTCAGCAACTTCGTGGTGA    |
| UPF2-F  | CAGGAAGAAGTTGGTACGGG    |
| UPF2-R  | ACATGCAGGGATGCAATGTA    |
| UPF3b-F | TTTTGTTTCAGGGATCGCTTT   |
| UPF3b-R | GCTTTTTGAAAAGGTGCAAT    |
| SMG1-F  | CTGGCAACCCAGAAGTATAG    |
| SMG1-R  | TGTAGCCACCCTTTTCGTCACT  |
| SMG5-F  | CAGTCTGAGCAGGAGAGCCT    |
| SMG5-R  | TGAAGTCGTAGCTGAGCCAT    |
| SMG6-F  | CTCTCCCATTGGAAGTACCCG   |
| SMG6-R  | CGGCGGACCAGTAGAGAAAAC   |
| SMG7-F  | CTCTGGAATCACGCCTTTAAGAA |
| SMG7-R  | CTTCACACGGCATGGTAAATCT  |
| GAPDH-F | CCTGTTTCGACAGTCAGCCG    |
| GAPDH-R | CGACCAAATCCGTTGACTCC    |

**b**

| DNA Sample   | Primer Set | Relative Signal (Arbitrary Units) |
|--------------|------------|-----------------------------------|
| CBG-TCR(WT)  | CBR        | 0.004                             |
|              | CBG        | 2420.133                          |
| CBR-TCR(PTC) | CBR        | 1044.635                          |
|              | CBG        | 0.053                             |

**Supplementary Table 1: (a) Sequences of qPCR primers. (b) Specificity of qPCR analysis for the CBR-TCR(PTC) and CBG-TCR(WT) reporter mRNAs.** Two regions with clustered sequence variations in the open reading frames of CBR and CBG were chosen to design qPCR primer sets for CBR-TCR(PTC) and CBG-TCR(WT) mRNAs, respectively. Results of qPCR analysis of the two reporter DNA templates show that CBR-specific primer set could not anneal to and amplify CBG-TCR(WT) and that CBG-specific primer sets could not anneal to and amplify CBR-TCR(PTC), demonstrating the specificity of these primers.

Supplementary Table 2. Primary screening data for all 1600 compounds in the Pharmokon library. Compounds are listed in descending order based upon their relative CBR:CBG ratio

| Compound                      | CBR:CBG Ratio (Relative to DMSO) | STDEV for Relative CBR:CBG Ratio | P-Value     | CBG (Relative to DMSO) |
|-------------------------------|----------------------------------|----------------------------------|-------------|------------------------|
| OUABAIN                       | 13.11573875                      | 2.770982402                      | 4.67787E-08 | 0.284422046            |
| DIGOXIN                       | 13.04031444                      | 2.909425255                      | 7.95344E-08 | 0.195833991            |
| DIGITOXIN                     | 11.32623422                      | 3.462787645                      | 1.67383E-06 | 0.187529381            |
| DOCUSATE SODIUM               | 10.47335893                      | 2.135605626                      | 5.25643E-08 | 0.349535902            |
| PROSCILLARIDIN                | 8.170570565                      | 1.460230803                      | 3.29538E-08 | 0.31273244             |
| LANATOSIDE C                  | 7.50198789                       | 1.744622647                      | 2.60071E-07 | 0.723547258            |
| BUTYL PARABEN                 | 6.47305491                       | 2.261641368                      | 1.16848E-05 | 0.251007595            |
| GENTIAN VIOLET                | 3.818000549                      | 1.4374894                        | 7.48864E-05 | 1.322600348            |
| ETHACRIDINE LACTATE           | 3.636277473                      | 0.601180089                      | 1.17182E-06 | 0.147268365            |
| PERHEXILINE MALEATE           | 3.108779281                      | 0.868736631                      | 1.3514E-05  | 0.382982542            |
| THIMEROSAL                    | 2.938604024                      | 1.952301931                      | 0.007944026 | 1.319435208            |
| DANTROLENE SODIUM             | 2.915480009                      | 0.748318486                      | 9.35144E-06 | 1.42198679             |
| PHENYL AMINOSALICYLATE        | 2.747733135                      | 0.581989524                      | 5.74853E-06 | 0.182877577            |
| ACRISORCIN                    | 2.723372554                      | 0.174804788                      | 4.27791E-10 | 0.362588036            |
| TRIMIPRAMINE MALEATE          | 2.558155916                      | 0.136640538                      | 2.5411E-09  | 0.581061265            |
| ACRIFLAVINIUM HYDROCHLORIDE   | 2.524211505                      | 0.194478913                      | 1.59518E-06 | 0.240401917            |
| FELBINAC                      | 2.521500047                      | 0.041909154                      | 9.5857E-08  | 0.536563669            |
| TENIPOSIDE                    | 2.383709621                      | 0.14818139                       | 1.72925E-09 | 1.407257225            |
| PROFLAVINE HEMISULFATE        | 2.340827716                      | 0.236444348                      | 7.64423E-06 | 0.755432613            |
| ERYTHROSINE SODIUM            | 2.328350506                      | 0.337079434                      | 6.89295E-07 | 0.648857707            |
| SECURININE                    | 2.306075764                      | 0.802547325                      | 0.000862207 | 2.631667288            |
| DAUNORUBICIN                  | 2.073758224                      | 0.255009526                      | 1.26961E-05 | 0.139350195            |
| AMCINONIDE                    | 2.048417138                      | 0.617856442                      | 0.000547235 | 1.899372051            |
| DACTINOMYCIN                  | 2.000874906                      | 0.372078481                      | 2.64758E-05 | 0.111039469            |
| VARDENAFIL HYDROCHLORIDE      | 1.967234609                      | 0.180228885                      | 1.4929E-05  | 1.667127224            |
| BENZETHONIUM CHLORIDE         | 1.935684809                      | 0.556506455                      | 0.000493805 | 2.09820458             |
| OXYBENZONE                    | 1.926824891                      | 0.15422391                       | 1.67086E-06 | 0.404646597            |
| METHSCOPOLAMINE BROMIDE       | 1.918513351                      | 0.624344624                      | 0.003136994 | 1.50545159             |
| RALOXIFENE HYDROCHLORIDE      | 1.913821816                      | 0.318718962                      | 6.52806E-05 | 1.429752677            |
| EQUILIN                       | 1.911484702                      | 0.320538864                      | 0.000102739 | 0.768798802            |
| TRIFLUPROMAZINE HYDROCHLORIDE | 1.855890417                      | 0.433360574                      | 0.00015898  | 1.516465067            |
| MONOBENZONE                   | 1.849949218                      | 0.4847508                        | 0.003422507 | 0.29201115             |
| CETRIMONIUM BROMIDE           | 1.795356397                      | 0.516813317                      | 0.007471041 | 1.046789269            |
| DIPYRIDAMOLE                  | 1.787258169                      | 0.192933597                      | 9.4806E-05  | 1.420048493            |
| CETYLPYRIDINIUM CHLORIDE      | 1.766292929                      | 0.20097289                       | 1.93883E-05 | 0.288983268            |
| PODOFILOX                     | 1.762268783                      | 0.578443002                      | 0.001725158 | 3.020968491            |
| AMINACRINE                    | 1.748318648                      | 0.066712164                      | 3.26572E-05 | 0.473973468            |
| EMETINE DIHYDROCHLORIDE       | 1.747823619                      | 0.242140605                      | 0.000224045 | 0.11289672             |
| PRAZOSIN HYDROCHLORIDE        | 1.732579761                      | 0.203857567                      | 0.000227345 | 2.202421447            |
| TACRINE HYDROCHLORIDE         | 1.722661435                      | 0.523477326                      | 0.002470128 | 2.104874993            |
| DOXORUBICIN                   | 1.715761543                      | 0.361335598                      | 0.00070555  | 0.11384062             |
| DROFENINE HYDROCHLORIDE       | 1.703219226                      | 0.780262031                      | 0.027181833 | 1.079376301            |
| THIORIDAZINE HYDROCHLORIDE    | 1.699483065                      | 1.242874666                      | 0.101766209 | 0.079065192            |
| CHLORPROTHIXENE HYDROCHLORIDE | 1.694710439                      | 0.46933045                       | 0.001205858 | 1.440021766            |
| DICHLORVOS                    | 1.691396932                      | 0.363740579                      | 0.001949291 | 1.591769841            |
| ALFUZOSIN HYDROCHLORIDE       | 1.665774396                      | 0.170273984                      | 0.000620715 | 1.416119004            |
| ANAGRELIDE HYDROCHLORIDE      | 1.664705477                      | 0.138808332                      | 0.000128461 | 1.272319782            |
| BENZALKONIUM CHLORIDE         | 1.649714327                      | 0.085678984                      | 9.86255E-05 | 2.251442355            |
| VINBLASTINE SULFATE           | 1.640718958                      | 0.293205574                      | 0.00031248  | 2.825357924            |
| IMIPRAMINE HYDROCHLORIDE      | 1.596345274                      | 0.394067849                      | 0.002397232 | 0.913505301            |
| NITROFURANTOIN                | 1.581256702                      | 0.466088819                      | 0.00729223  | 1.418205975            |
| ALTRENOGEST                   | 1.575948832                      | 0.165755294                      | 0.000486545 | 1.371162138            |
| MEGESTROL ACETATE             | 1.565364115                      | 0.232532906                      | 0.000347222 | 1.64202152             |
| FLUOXENE                      | 1.559890523                      | 0.155819031                      | 0.00058749  | 1.435558873            |
| FINASTERIDE                   | 1.558397784                      | 0.197557708                      | 0.005632739 | 1.651301546            |
| MOGUISTEINE                   | 1.556547552                      | 1.289557417                      | 0.203998567 | 1.245302393            |
| PHENYLBUTAZONE                | 1.553361645                      | 0.519968093                      | 0.010103202 | 1.114196252            |
| LOPERAMIDE HYDROCHLORIDE      | 1.542080142                      | 0.312142938                      | 0.000462682 | 1.273140198            |
| FENOFIBRIC ACID               | 1.541917699                      | 0.328075596                      | 0.006792115 | 1.222448791            |
| OCTOPAMINE HYDROCHLORIDE      | 1.536005223                      | 0.121106963                      | 0.004232354 | 1.14689652             |
| PIMOZIDE                      | 1.525290106                      | 0.391760381                      | 0.004143808 | 1.470402881            |
| GEMIFLOXACIN MESYLATE         | 1.522708567                      | 0.319369904                      | 0.000688077 | 1.290706282            |
| FAMPROFAZONE                  | 1.51939058                       | 0.087909861                      | 0.000503427 | 1.54683724             |
| INDOMETHACIN                  | 1.519324098                      | 0.462202837                      | 0.010227528 | 1.348391513            |
| TRICHLORFON                   | 1.519061025                      | 0.372831357                      | 0.002893694 | 1.282300788            |
| DIFLOXACIN HYDROCHLORIDE      | 1.511913604                      | 0.052164651                      | 2.40722E-06 | 1.292318213            |
| PAZUFLOXACIN MESYLATE         | 1.510434826                      | 0.810288414                      | 0.098016345 | 1.124427475            |
| TETRAMIZOLE HYDROCHLORIDE     | 1.508466162                      | 0.370946791                      | 0.003223168 | 3.400941425            |

|                                   |             |             |             |             |
|-----------------------------------|-------------|-------------|-------------|-------------|
| DOXAZOSIN MESYLATE                | 1.503355836 | 0.186842635 | 0.000475097 | 1.446986217 |
| ETHYL PARABEN                     | 1.500356253 | 0.166003975 | 0.029087273 | 0.476471883 |
| FLUNARIZINE HYDROCHLORIDE         | 1.500153597 | 0.133347471 | 0.001116463 | 1.470422903 |
| DANTHRON                          | 1.497589328 | 0.046250558 | 2.8678E-06  | 0.810533484 |
| AZELASTINE HYDROCHLORIDE          | 1.495416951 | 0.077997624 | 0.002014742 | 1.149468946 |
| OLMESARTAN                        | 1.489936555 | 0.64013501  | 0.039759763 | 1.272551328 |
| BERBERINE CHLORIDE                | 1.488014402 | 0.386044393 | 0.023055472 | 1.068738761 |
| PROPANTHELINE BROMIDE             | 1.471496058 | 0.096367882 | 0.002724065 | 1.063635939 |
| COLCHICINE                        | 1.468732911 | 0.220802959 | 0.004786654 | 3.238146193 |
| DERACOXIB                         | 1.463778266 | 0.208067274 | 0.005798464 | 1.579204567 |
| BUDESONIDE                        | 1.462741165 | 0.290911992 | 0.006449903 | 1.292035918 |
| MELENGESTROL ACETATE              | 1.458971498 | 0.374065141 | 0.012938561 | 1.732538565 |
| NONOXYNOL-9                       | 1.456648839 | 0.393348853 | 0.005113855 | 1.655448382 |
| QUINETHAZONE                      | 1.452113848 | 0.677451484 | 0.073257916 | 1.958304905 |
| CYCLOBENZAPRINE HYDROCHLORIDE     | 1.446792877 | 0.054829825 | 0.000299956 | 1.202994255 |
| MEBEVERINE HYDROCHLORIDE          | 1.446186064 | 0.423563964 | 0.0210532   | 1.583634201 |
| CYANOCOBALAMIN                    | 1.444993092 | 0.216093738 | 0.004441087 | 1.260521796 |
| KETOROLAC TROMETHAMINE            | 1.443440741 | 0.12232434  | 0.002076046 | 1.6322347   |
| BETAHISTINE HYDROCHLORIDE         | 1.44281054  | 0.224667114 | 0.004892295 | 1.658017213 |
| HYDROXYPROGESTERONE CAPROATE      | 1.440645781 | 0.306016438 | 0.01775295  | 1.747806615 |
| FLUTAMIDE                         | 1.440520677 | 0.355532219 | 0.013924845 | 1.646295733 |
| VANCOMYCIN HYDROCHLORIDE          | 1.439249426 | 0.542391942 | 0.045127054 | 1.154776942 |
| SITAGLIPTIN MONOPHOSPHATE MONOHOY | 1.433562267 | 0.337221072 | 0.022690196 | 1.070542014 |
| BEKANAMYCIN SULFATE               | 1.430414066 | 0.241277703 | 0.006577342 | 1.437136731 |
| NADIFLOXACIN                      | 1.423976235 | 0.19221331  | 0.004174262 | 1.111661452 |
| ROFECOXIB                         | 1.419500469 | 0.183262825 | 0.008879429 | 1.126493381 |
| RIBAVIRIN                         | 1.416845982 | 0.416838274 | 0.096466716 | 1.207595529 |
| DANAZOL                           | 1.416761327 | 0.131371808 | 0.005612204 | 1.474117481 |
| PROMAZINE HYDROCHLORIDE           | 1.413649958 | 0.300507844 | 0.018004649 | 1.619404775 |
| ISOETHARINE MESYLATE              | 1.411038682 | 0.363956648 | 0.020281024 | 1.03522298  |
| THONZONIUM BROMIDE                | 1.410845676 | 0.401622363 | 0.026121215 | 1.139395727 |
| PENFLURIDOL                       | 1.407633286 | 0.473313331 | 0.094663058 | 1.607649885 |
| SOLEUCINE (L)                     | 1.405453658 | 0.162821029 | 0.005017138 | 1.105541724 |
| DROSPIRENONE                      | 1.402404064 | 0.189614372 | 0.070073645 | 1.566274469 |
| PENTAGASTRIN                      | 1.395816011 | 0.41456456  | 0.032695484 | 1.338749562 |
| MANIDIPINE HYDROCHLORIDE          | 1.395353881 | 0.282846958 | 0.086627871 | 1.122527772 |
| ISOXSUPRINE HYDROCHLORIDE         | 1.393731178 | 0.283348646 | 0.009636213 | 1.491950873 |
| CHLORCYCLIZINE HYDROCHLORIDE      | 1.390656481 | 0.422550072 | 0.026487864 | 1.211330951 |
| HYMECHROME                        | 1.385007975 | 0.251180461 | 0.006017513 | 1.148671138 |
| CLOFAZIMINE                       | 1.382945786 | 0.449071703 | 0.130744941 | 1.614098474 |
| TANNIC ACID                       | 1.380020196 | 0.049734735 | 3.21386E-05 | 1.465578606 |
| KETOTIFEN FUMARATE                | 1.379465067 | 0.271277417 | 0.16084747  | 1.314422734 |
| HEXYLRESORCINOL                   | 1.376539276 | 0.358315617 | 0.022448466 | 0.894822802 |
| DEXCHLORPHENIRAMINE MALEATE       | 1.375217542 | 0.120740215 | 0.006138704 | 1.201138094 |
| PERPHENAZINE                      | 1.372276021 | 0.033902775 | 0.004400549 | 1.722547701 |
| FLORFENICOL                       | 1.371669435 | 0.176904303 | 0.009050938 | 1.16421294  |
| LETROZOLE                         | 1.371382829 | 0.837624309 | 0.183645132 | 0.124574221 |
| RISEDRONATE SODIUM                | 1.370078096 | 0.159536437 | 0.088453492 | 1.364123165 |
| ZIPRASIDONE MESYLATE              | 1.367449521 | 0.121170763 | 0.006937946 | 1.322384843 |
| VINPOCETINE                       | 1.364455699 | 0.222460292 | 0.100557816 | 1.253539593 |
| ALVERINE CITRATE                  | 1.363643101 | 0.302488463 | 0.013671978 | 1.347875956 |
| VIGABATRIN                        | 1.362429593 | 0.451967898 | 0.057852536 | 0.929194389 |
| ETHAVERINE HYDROCHLORIDE          | 1.361164288 | 0.166020594 | 0.036280126 | 1.580939726 |
| CLIOQUINOL                        | 1.35692365  | 0.149802043 | 0.010001512 | 1.464201682 |
| TESTOSTERONE PROPIONATE           | 1.347702776 | 0.345077013 | 0.012788055 | 1.738338126 |
| NILUTAMIDE                        | 1.345777338 | 0.222968412 | 0.002080505 | 1.517464228 |
| SODIUM PHENYLACETATE              | 1.34570668  | 0.123430115 | 0.024966459 | 1.028715903 |
| RISPERIDONE                       | 1.345474071 | 0.393720336 | 0.050839588 | 0.937757513 |
| BENZYL BENZOATE                   | 1.344881825 | 0.207866339 | 0.003792247 | 0.791813663 |
| BEPRIDIL HYDROCHLORIDE            | 1.343305302 | 0.330200497 | 0.016688023 | 1.73176085  |
| ERGOTAMINE TARTRATE               | 1.341086976 | 0.352526066 | 0.064282896 | 1.574021822 |
| OFLOXACIN                         | 1.339628103 | 0.209944145 | 0.060418355 | 1.422540124 |
| TORSEMIDE                         | 1.335625779 | 0.128386674 | 0.028887503 | 1.02007574  |
| PROGESTERONE                      | 1.332647067 | 0.453900744 | 0.06781627  | 1.771443487 |
| LINAGLIPTIN                       | 1.330015249 | 0.600311344 | 0.123944357 | 1.188980471 |
| LOXAPINE SUCCINATE                | 1.329356768 | 0.213456198 | 0.021826209 | 1.255900586 |
| MEDROXYPROGESTERONE ACETATE       | 1.327402448 | 0.237485352 | 0.016942781 | 1.507434341 |
| NIFEDIPINE                        | 1.326970285 | 0.151451361 | 0.015882997 | 1.372093887 |
| CHLOROTHIAZIDE                    | 1.325183159 | 0.292871015 | 0.021671131 | 1.281258821 |
| TELMISARTAN                       | 1.324261676 | 0.312116222 | 0.156724296 | 0.863931263 |
| ALBUTEROL                         | 1.322311667 | 0.270857467 | 0.149913203 | 1.540932595 |
| YOHIMBINE HYDROCHLORIDE           | 1.321976257 | 0.297213233 | 0.039642445 | 1.503849808 |

|                                     |             |             |             |             |
|-------------------------------------|-------------|-------------|-------------|-------------|
| CEPHRADINE                          | 1.318028285 | 0.0777598   | 0.003857359 | 1.149246779 |
| VINCRIStINE SULFATE                 | 1.317760451 | 0.164072192 | 0.102419561 | 3.202049464 |
| VALGANCICLOVIR HYDROCHLORIDE        | 1.317042887 | 0.355658843 | 0.056939639 | 1.193587171 |
| TRAZODONE HYDROCHLORIDE             | 1.316583587 | 0.350831474 | 0.029483904 | 1.096852827 |
| THIOPENTAL SODIUM                   | 1.315115757 | 0.114624453 | 0.036400871 | 0.892302382 |
| CHLORQUINALDOL                      | 1.314180406 | 0.662432785 | 0.185891153 | 1.023198923 |
| ASTEMIZOLE                          | 1.311471608 | 0.291355317 | 0.018051941 | 1.401223973 |
| TANDUTINIB                          | 1.311288183 | 0.164834085 | 0.066779048 | 1.140003944 |
| FLURBIPROFEN                        | 1.309870778 | 0.355368645 | 0.049861926 | 1.889264048 |
| OXELAI DIN CITRATE                  | 1.309801837 | 0.085092506 | 0.055913386 | 1.09048287  |
| BISACODYL                           | 1.304239092 | 0.257230159 | 0.021844614 | 1.316316296 |
| IMIQUIMOD                           | 1.30358209  | 0.426447022 | 0.051168859 | 1.74712915  |
| TRIMETHADIONE                       | 1.302482239 | 0.363286539 | 0.069822799 | 1.110052746 |
| BUTACAINE                           | 1.302166917 | 0.109248499 | 0.017523026 | 1.283081037 |
| ENTACAPONE                          | 1.300602024 | 0.211986948 | 0.058713431 | 1.087135854 |
| NISOLDIPINE                         | 1.299812073 | 0.214596659 | 0.048819894 | 1.057426837 |
| EVANS BLUE                          | 1.29975287  | 0.142666447 | 0.11768176  | 1.256046358 |
| THIOTHIXENE                         | 1.298620598 | 0.287607883 | 0.065033783 | 1.457203749 |
| TICLOPIDINE HYDROCHLORIDE           | 1.296373656 | 0.431115376 | 0.101420441 | 0.894788486 |
| IRSOGLADINE MALEATE                 | 1.29472008  | 0.117524604 | 0.070018069 | 0.927714732 |
| OXYPHENBUTAZONE                     | 1.294685724 | 0.110431843 | 0.007141165 | 0.969734388 |
| ACONITINE                           | 1.293443263 | 0.599000081 | 0.17295489  | 1.24374549  |
| DICLAZURIL                          | 1.291998951 | 0.275200421 | 0.023500173 | 1.038625769 |
| TEPOXALIN                           | 1.291895563 | 0.096680537 | 0.081273476 | 1.356799639 |
| NORTRIPTYLINE HYDROCHLORIDE         | 1.291551212 | 0.220057949 | 0.018929039 | 1.036867728 |
| MITOXANTRONE HYDROCHLORIDE          | 1.291462357 | 0.211516676 | 0.034649021 | 0.126967234 |
| ESTRADIOL CYPIONATE                 | 1.286777169 | 0.267099094 | 0.063489332 | 1.394119403 |
| CASANTHRANOL [cascarioside A shown] | 1.285289458 | 0.254094537 | 0.050197153 | 1.254622499 |
| FULVESTRANT                         | 1.285274589 | 0.385671779 | 0.158614269 | 1.43009598  |
| MECHLORETHAMINE                     | 1.284906188 | 0.201518873 | 0.068464002 | 1.185589842 |
| ATOVAQUONE                          | 1.28351952  | 0.265396461 | 0.198823647 | 1.362643108 |
| MEXILETINE HYDROCHLORIDE            | 1.282652692 | 0.247961547 | 0.047811037 | 1.222266849 |
| MEBHVDROLIN NAPHTHALENESULFONAT     | 1.280778654 | 0.064108441 | 0.076768312 | 1.307400859 |
| TYROTHRIN                           | 1.280691355 | 0.367280779 | 0.091933964 | 3.225728185 |
| TRAVOPROST                          | 1.280326386 | 0.034245197 | 0.17191574  | 1.293173793 |
| PRANOPROFEN                         | 1.279574202 | 0.348026404 | 0.141395284 | 1.231429267 |
| ALTHIAZIDE                          | 1.277593958 | 0.406879485 | 0.112192173 | 1.350915014 |
| ESTRONE                             | 1.275666458 | 0.369183667 | 0.081152341 | 1.776736273 |
| ACETOPHENAZINE MALEATE              | 1.275179891 | 0.172906417 | 0.192874694 | 1.366297086 |
| SULISO BENZONE                      | 1.27414811  | 0.242739533 | 0.030234401 | 1.046596754 |
| FOLIC ACID                          | 1.273954552 | 0.248736919 | 0.128553878 | 1.572845149 |
| TRIMEBUTINE MALEATE                 | 1.271847976 | 0.400692641 | 0.172083826 | 1.168150969 |
| CLOBETASOL PROPIONATE               | 1.27155321  | 0.075937891 | 0.02571932  | 1.880294077 |
| N-METHYL (-)EPHEDRINE [1R,2S]       | 1.27083999  | 0.269151292 | 0.126036497 | 1.094028613 |
| ALRESTATIN                          | 1.269593238 | 0.393778731 | 0.074981792 | 1.071242778 |
| ALLANTOIN                           | 1.267953239 | 0.231169636 | 0.0564449   | 1.454825815 |
| CAPOBENIC ACID                      | 1.267627239 | 0.219602322 | 0.052198207 | 1.127734339 |
| TERBINAFINE HYDROCHLORIDE           | 1.26654097  | 0.341913602 | 0.041625487 | 1.279972102 |
| GRAMICIDIN (gramicidin A shown)     | 1.26634516  | 0.10990881  | 0.019358725 | 1.214496961 |
| CINNARAZINE                         | 1.26624768  | 0.262030173 | 0.027856585 | 1.311480988 |
| CEPHARANTHINE                       | 1.266227876 | 0.223668729 | 0.050564981 | 1.188429667 |
| NIFENAZONE                          | 1.265866292 | 0.150778113 | 0.10685304  | 0.914592249 |
| DILAZEP DIHYDROCHLORIDE             | 1.26546968  | 0.344532185 | 0.070841061 | 1.286553279 |
| TERBUTALINE HEMISULFATE             | 1.265122519 | 0.408888204 | 0.145939327 | 1.893243061 |
| THEOBROMINE                         | 1.263302108 | 0.134801734 | 0.002353464 | 1.286808739 |
| CYCLOHEXIMIDE                       | 1.262451991 | 0.18199735  | 0.015755943 | 0.802633468 |
| DEHYDROACETIC ACID                  | 1.262197073 | 0.355628455 | 0.180007894 | 1.400767472 |
| CHLOROQUINE DIPHOSPHATE             | 1.261870497 | 0.191627495 | 0.025447766 | 1.41681527  |
| AMODIAQUINE DIHYDROCHLORIDE         | 1.260382528 | 0.300750411 | 0.057578783 | 1.311123099 |
| PIROMIDIC ACID                      | 1.259300506 | 0.47291842  | 0.22267568  | 1.185915072 |
| TEMOZOLAMIDE                        | 1.258626398 | 0.165282743 | 0.127875159 | 1.588419123 |
| MEGLUTOL                            | 1.258429403 | 0.137375996 | 0.122864224 | 1.691200711 |
| LISINOPRIL                          | 1.257204119 | 0.368918354 | 0.192892025 | 1.447815513 |
| EUCALYPTOL                          | 1.257054385 | 0.27034768  | 0.241800608 | 1.112432419 |
| TIOXOLONE                           | 1.25669268  | 0.725349355 | 0.343549781 | 1.285319183 |
| LOMEFLOXACIN HYDROCHLORIDE          | 1.256519388 | 0.072228288 | 0.164939026 | 1.199807305 |
| LIPOAMIDE                           | 1.256031103 | 0.446269219 | 0.216078856 | 1.309908824 |
| CYPROHEPTADINE HYDROCHLORIDE        | 1.255316752 | 0.184796446 | 0.006855797 | 1.647508698 |
| OXEDRINE                            | 1.254441093 | 0.351628963 | 0.17824269  | 1.550423465 |
| ACETYLCYSTEINE                      | 1.252382292 | 0.262726922 | 0.050039473 | 1.155178357 |
| MOMETASONE FUROATE                  | 1.251582568 | 0.298586904 | 0.258600534 | 1.673205571 |
| ACYCLOVIR                           | 1.251480164 | 0.231410925 | 0.06723133  | 1.307900082 |

|                                |             |             |             |             |
|--------------------------------|-------------|-------------|-------------|-------------|
| CEFTRIAZONE SODIUM TRIHYDRATE  | 1.251155474 | 0.175320013 | 0.015082246 | 1.382615597 |
| MIFEPRISTONE                   | 1.250884004 | 0.206193782 | 0.195003356 | 1.686897408 |
| OLSALAZINE SODIUM              | 1.250846052 | 0.137191155 | 0.02940862  | 1.440655395 |
| EFLOXATE                       | 1.25029175  | 0.310992192 | 0.168893816 | 1.327680169 |
| CLEMIZOLE HYDROCHLORIDE        | 1.250101839 | 0.228407949 | 0.225858853 | 1.900892663 |
| PROTRYPTILINE HYDROCHLORIDE    | 1.248804155 | 0.171306749 | 0.052985022 | 1.004358178 |
| ARECOLINE HYDROBROMIDE         | 1.24780373  | 0.331012724 | 0.049989902 | 1.397221239 |
| PAROXETINE HYDROCHLORIDE       | 1.247783575 | 0.198586481 | 0.060787864 | 1.537919397 |
| ETOMIDATE                      | 1.247160042 | 0.262813875 | 0.084156916 | 1.25428433  |
| METICRANE                      | 1.246987717 | 0.27100235  | 0.159568775 | 1.177401378 |
| FLUOXETINE                     | 1.246857179 | 0.350879511 | 0.120825634 | 1.310169737 |
| SELEGILINE HYDROCHLORIDE       | 1.246000294 | 0.422936212 | 0.197575905 | 1.101820431 |
| BETAINE HYDROCHLORIDE          | 1.2451383   | 0.205149268 | 0.023079338 | 1.31252034  |
| CHOLESTEROL                    | 1.244399107 | 0.389514594 | 0.147060297 | 1.413301719 |
| BEMOTRIZINOL                   | 1.243953819 | 0.284772593 | 0.26872212  | 1.124389804 |
| LEVOSIMENDAN                   | 1.243147534 | 0.171490622 | 0.020641894 | 1.171513816 |
| IDOXURIDINE                    | 1.242186936 | 0.053839085 | 0.186139539 | 1.320060261 |
| PEFLOXACINE MESYLATE           | 1.240939853 | 0.128800911 | 0.079691469 | 0.998420018 |
| FIUMAZENIL                     | 1.2408886   | 0.39278702  | 0.152459916 | 1.02240516  |
| SELAMECTIN                     | 1.24050481  | 0.228959123 | 0.077212075 | 1.664238417 |
| NATAMYCIN                      | 1.239712259 | 0.206948842 | 0.11822497  | 1.044408943 |
| TETROQUINONE                   | 1.23868248  | 0.119338363 | 0.050357954 | 1.474981622 |
| EXEMESTANE                     | 1.238049873 | 0.214638986 | 0.105386512 | 1.917251969 |
| BENZYL ALCOHOL                 | 1.23792663  | 0.347295405 | 0.203722112 | 1.168375846 |
| CAMYLOFINE DIHYDROCHLORIDE     | 1.237825841 | 0.329041202 | 0.196349184 | 1.20311886  |
| METERGOLINE                    | 1.237781629 | 0.120036607 | 0.048404745 | 1.099090006 |
| QUININE ETHYL CARBONATE        | 1.237257159 | 0.221940784 | 0.158722303 | 1.146028276 |
| CANDESARTAN                    | 1.236299295 | 0.508070234 | 0.290285976 | 1.126176321 |
| TRIACETIN                      | 1.234621337 | 0.215877653 | 0.107016244 | 1.120184975 |
| LOSARTAN                       | 1.234608866 | 0.385011568 | 0.091579929 | 1.336166093 |
| LOBELINE HYDROCHLORIDE         | 1.23429656  | 0.329557187 | 0.20273691  | 1.295041247 |
| DILTIAZEM HYDROCHLORIDE        | 1.233038347 | 0.126780905 | 0.060331964 | 1.524375407 |
| CARBADOX                       | 1.232751726 | 0.293809865 | 0.292421968 | 1.193738765 |
| CHLORMADINONE ACETATE          | 1.232746829 | 0.17823668  | 0.101065751 | 1.665996538 |
| CLOPIDOGREL SULFATE            | 1.232039091 | 0.371377501 | 0.153019794 | 1.248438716 |
| ALLYLSIOTHIOCYANATE            | 1.230422239 | 0.243782381 | 0.098254129 | 2.430771883 |
| GUANADREL SULFATE              | 1.227322865 | 0.165145563 | 0.037509146 | 1.168805776 |
| ACECLOFENAC                    | 1.223522566 | 0.400186263 | 0.258032639 | 1.174769175 |
| SPARFLOXACIN                   | 1.221789704 | 0.118397531 | 0.229946049 | 1.13487664  |
| SULCTIDIL                      | 1.221512547 | 0.295216953 | 0.226827867 | 1.240364056 |
| BENOXINATE HYDROCHLORIDE       | 1.221120789 | 0.097328155 | 0.228330504 | 1.374696875 |
| BENZOYLPAAS                    | 1.220831266 | 0.325231046 | 0.148340075 | 0.991276621 |
| MEFENAMIC ACID                 | 1.22034483  | 0.088281282 | 0.027155757 | 1.076549798 |
| METHICILLIN SODIUM             | 1.219708582 | 0.254857994 | 0.091580182 | 1.401864677 |
| KETOPROFEN                     | 1.219537383 | 0.258699766 | 0.217241928 | 1.276523844 |
| NIMODIPINE                     | 1.218703923 | 0.183189738 | 0.086478297 | 1.365770383 |
| ESTRADIOL                      | 1.217851617 | 0.095561695 | 0.088815003 | 1.412584376 |
| MERBROMIN                      | 1.217344809 | 0.303858738 | 0.090265415 | 1.04075939  |
| AZITHROMYCIN                   | 1.217224015 | 0.113718299 | 0.06930497  | 1.799539433 |
| SULFAGUANIDINE                 | 1.214363187 | 0.45405828  | 0.230936131 | 0.95629956  |
| alpha-TOCHOPHERYL ACETATE      | 1.213744783 | 0.152411186 | 0.045544969 | 1.166843824 |
| PIPERIDOLATE HYDROCHLORIDE     | 1.213458436 | 0.33866772  | 0.110054644 | 1.156629821 |
| PERMETHRIN                     | 1.211626726 | 0.297562307 | 0.094205467 | 1.364236661 |
| ESTRIOL                        | 1.210287397 | 0.200225736 | 0.079984528 | 1.315791531 |
| PANTOPRAZOLE                   | 1.210250434 | 0.338696342 | 0.093039063 | 1.124245337 |
| MEPENZOLATE BROMIDE            | 1.209877529 | 0.289645356 | 0.123212056 | 1.38560806  |
| AMSACRINE                      | 1.209849467 | 0.269584466 | 0.135600952 | 1.482039778 |
| DOBUTAMINE HYDROCHLORIDE       | 1.208577587 | 0.268429609 | 0.1924359   | 1.236354104 |
| OXYPHENCYCLIMINE HYDROCHLORIDE | 1.208382248 | 0.236774848 | 0.038054774 | 1.43603975  |
| DIBENZOTHIOPHENE               | 1.206842373 | 0.045716444 | 0.096694043 | 0.969082093 |
| ALLOPURINOL                    | 1.205795529 | 0.05921357  | 0.033810089 | 1.196635799 |
| MEPIVACAINE HYDROCHLORIDE      | 1.205354599 | 0.355184274 | 0.111499277 | 1.402127095 |
| AZASERINE                      | 1.204572613 | 0.2803247   | 0.063502939 | 1.289773262 |
| RABEPRAZOLE SODIUM             | 1.204267755 | 0.43495616  | 0.395785607 | 1.22477588  |
| METHOPRENE (S)                 | 1.203955723 | 0.031241774 | 0.287771928 | 1.596375065 |
| ARIPIRAZOLE                    | 1.202371428 | 0.100689335 | 0.318075587 | 1.342633461 |
| CLEMASTINE FUMARATE            | 1.20146114  | 0.329953062 | 0.206355087 | 1.055436515 |
| CARVEDILOL PHOSPHATE           | 1.200936347 | 0.31897043  | 0.123509072 | 1.427891628 |
| BENZYDAMINE HYDROCHLORIDE      | 1.200929616 | 0.082024183 | 0.319476211 | 1.369703612 |
| SERTRALINE HYDROCHLORIDE       | 1.200561132 | 0.378634301 | 0.246358751 | 1.423439771 |
| FOMEPIZOLE HYDROCHLORIDE       | 1.200357731 | 0.334032973 | 0.190886876 | 1.107938611 |
| BENZBROMARONE                  | 1.199863311 | 0.021333942 | 0.31841154  | 1.216463175 |

|                                     |             |             |             |             |
|-------------------------------------|-------------|-------------|-------------|-------------|
| ALGESTONE ACETOPHENIDE              | 1.199762294 | 0.232818341 | 0.24920442  | 1.241856838 |
| ZOMEPIRAC SODIUM                    | 1.199650564 | 0.174868622 | 0.335312298 | 1.195678301 |
| PACLITAXEL                          | 1.199581379 | 0.123771414 | 0.093749518 | 1.869297472 |
| QUINAPRIL HYDROCHLORIDE             | 1.199118353 | 0.159623222 | 0.037371936 | 1.57073445  |
| PRIDINOL METHANESULFONATE           | 1.198787145 | 0.147519748 | 0.208127707 | 1.317567869 |
| COLISTIN SULFATE                    | 1.198570686 | 0.331855318 | 0.37621823  | 1.12350619  |
| ALEXIDINE HYDROCHLORIDE             | 1.198339513 | 0.32667909  | 0.184906404 | 1.288426578 |
| CEFPYRIMIDE                         | 1.198188505 | 0.287605441 | 0.364605082 | 1.114703699 |
| CLINAFOXACIN HYDROCHLORIDE          | 1.197536651 | 0.210767119 | 0.34738905  | 1.14920001  |
| PRAVASTATIN SODIUM                  | 1.196522744 | 0.045299308 | 0.00406134  | 1.205252168 |
| SULFAMERAZINE                       | 1.19585335  | 0.02141329  | 0.122192173 | 1.523259945 |
| TILMICOSIN                          | 1.195449734 | 0.09819863  | 0.204624079 | 1.175881753 |
| FENBUFEN                            | 1.195219544 | 0.339919445 | 0.207266343 | 0.690449447 |
| SPECTINOMYCIN HYDROCHLORIDE         | 1.195199334 | 0.213345634 | 0.170377049 | 1.307549947 |
| SULFAMETHAZINE                      | 1.194978674 | 0.249914997 | 0.18720282  | 1.420568315 |
| NOSCAPINE HYDROCHLORIDE             | 1.194711522 | 0.18169204  | 0.12624041  | 1.779745499 |
| ERYTHROMYCIN ETHYLSUCCINATE         | 1.194611657 | 0.270241914 | 0.188757051 | 1.081288067 |
| EDETATE DISODIUM                    | 1.194573986 | 0.259373003 | 0.088126271 | 1.413222339 |
| DESOXYCORTICOSTERONE ACETATE        | 1.19384138  | 0.188229358 | 0.028852688 | 1.992364574 |
| ROSUVASTATIN CALCIUM                | 1.192919021 | 0.217854536 | 0.181047207 | 1.1167956   |
| THIOCTIC ACID                       | 1.192559703 | 0.095839286 | 0.092694449 | 1.225629547 |
| SULFINPYRAZONE                      | 1.190748213 | 0.456997753 | 0.311182044 | 1.030785225 |
| METOCLOPRAMIDE HYDROCHLORIDE        | 1.190468013 | 0.355603217 | 0.274199056 | 1.000167183 |
| OXICONAZOLE NITRATE                 | 1.190031187 | 0.235603564 | 0.195010608 | 1.280904019 |
| ISOPROTERENOL HYDROCHLORIDE         | 1.189006106 | 0.298647076 | 0.166166573 | 1.663790362 |
| MEPRYLCAINE HYDROCHLORIDE           | 1.188005574 | 0.102985989 | 0.05525631  | 1.134915299 |
| LINEZOLID                           | 1.187610378 | 0.233371866 | 0.221514797 | 1.179428382 |
| TYLOXAPOL                           | 1.186952971 | 0.201059732 | 0.066117899 | 1.310535636 |
| CORTISONE ACETATE                   | 1.186793694 | 0.191743603 | 0.168284742 | 1.225254509 |
| CEFACLOR                            | 1.186310892 | 0.152103639 | 0.129900167 | 1.35375583  |
| CHLORALOSE                          | 1.186130576 | 0.259764389 | 0.367613529 | 1.394857321 |
| BIPERIDEN                           | 1.185537166 | 0.10319307  | 0.113198807 | 1.15572641  |
| BUPROPION                           | 1.185245501 | 0.341447397 | 0.326269336 | 1.337668825 |
| AZATHIOPRINE                        | 1.184400273 | 0.064632252 | 0.053077784 | 2.784240026 |
| IOVERSOL                            | 1.184126973 | 0.187802366 | 0.211215962 | 1.100053739 |
| CIPROFLOXACIN                       | 1.183763204 | 0.226338032 | 0.161924884 | 1.663870104 |
| CLINDAMYCIN PALMITATE HYDROCHLORIDE | 1.182931138 | 0.31180343  | 0.215269214 | 1.084622927 |
| RIFAXIMIN                           | 1.181767955 | 0.264659945 | 0.082202337 | 1.198412914 |
| BENZONATATE                         | 1.181684862 | 0.158235555 | 0.083381785 | 1.250240568 |
| SIMVASTATIN                         | 1.181432839 | 0.106348297 | 0.166600117 | 1.294516974 |
| MEXEZONE                            | 1.180925622 | 0.240754272 | 0.28497591  | 1.228233089 |
| KAINIC ACID                         | 1.180914735 | 0.494367341 | 0.333085436 | 1.067289832 |
| CEFTIOFUR HYDROCHLORIDE             | 1.17657997  | 0.109217938 | 0.381760978 | 1.151840572 |
| OCTODRINE                           | 1.176483457 | 0.273462304 | 0.320358279 | 1.032045499 |
| RIFAMPIN                            | 1.176006609 | 0.243446799 | 0.226834583 | 1.212983723 |
| ISOPROPAMIDE IODIDE                 | 1.175657333 | 0.484005361 | 0.325897809 | 1.579208722 |
| DORAMECTIN                          | 1.175330666 | 0.167148208 | 0.345275002 | 1.313843876 |
| CREATININE                          | 1.174380752 | 0.409753531 | 0.375985678 | 0.92083968  |
| CEPHALEXIN                          | 1.173952131 | 0.383768123 | 0.373927066 | 1.619138794 |
| OXOLINIC ACID                       | 1.173815208 | 0.373432188 | 0.369672828 | 1.062463224 |
| HYDROQUINONE                        | 1.173694495 | 0.137306442 | 0.063111392 | 1.589985943 |
| RIZATRIPTAN BENZOATE                | 1.173342984 | 0.252031127 | 0.242039754 | 1.152620955 |
| EPRINOMECTIN                        | 1.17060344  | 0.219476402 | 0.19048702  | 1.038714825 |
| MERCAPTOPYRIMINE                    | 1.17017257  | 0.187794763 | 0.245210131 | 2.591957456 |
| PANCURONIUM BROMIDE                 | 1.169872763 | 0.2861058   | 0.231133514 | 1.305306729 |
| AMILORIDE HYDROCHLORIDE             | 1.169778025 | 0.202049362 | 0.125766225 | 1.257947028 |
| AMOROLFINE HYDROCHLORIDE            | 1.169202033 | 0.043080567 | 0.131967179 | 1.100568914 |
| MEPARTRICIN                         | 1.169000557 | 0.156732533 | 0.035066597 | 1.41993737  |
| PEMPIDINE TARTRATE                  | 1.168726482 | 0.559251328 | 0.509051027 | 1.20521289  |
| TRANLYCYPROMINE SULFATE             | 1.168582197 | 0.257955645 | 0.253143713 | 1.082849801 |
| BITHIONATE SODIUM                   | 1.167933211 | 0.155855722 | 0.104712259 | 1.24512064  |
| ERYTHROMYCIN ESTOLATE               | 1.167203616 | 0.215215276 | 0.103991631 | 1.119255352 |
| STAVUDINE                           | 1.167167646 | 0.217667049 | 0.265379904 | 1.084800808 |
| ACEXAMIC ACID                       | 1.166714448 | 0.092735751 | 0.137766635 | 0.987554527 |
| TERAZOSIN HYDROCHLORIDE             | 1.16641251  | 0.124140781 | 0.157245538 | 1.239068904 |
| DOCONEXENT                          | 1.166135196 | 0.255909768 | 0.214848617 | 1.063001406 |
| METHACHOLINE CHLORIDE               | 1.16534583  | 0.248496758 | 0.284245052 | 0.977626461 |
| VERAPAMIL HYDROCHLORIDE             | 1.163714392 | 0.148809879 | 0.082486258 | 1.418128622 |
| DISOPYRAMIDE PHOSPHATE              | 1.163289858 | 0.128629937 | 0.197907172 | 1.00905833  |
| PIPERACILLIN SODIUM                 | 1.162056097 | 0.404892791 | 0.355524812 | 1.256073001 |
| NIKETHAMIDE                         | 1.16203597  | 0.664257872 | 0.526796587 | 1.32026143  |
| CEFOPRANIDE                         | 1.160366555 | 0.236939897 | 0.447701396 | 1.043810391 |

|                                       |             |             |             |             |
|---------------------------------------|-------------|-------------|-------------|-------------|
| PROTOPORPHYRIN IX                     | 1.160153733 | 0.141685271 | 0.302171411 | 1.402572513 |
| TRIOXALEN                             | 1.159773963 | 0.540997103 | 0.423778984 | 1.435342494 |
| CICLOPIROX OLAMINE                    | 1.159223336 | 0.162414689 | 0.097260378 | 1.07411388  |
| CARBENICILLIN DISODIUM                | 1.158277314 | 0.122192595 | 0.107745434 | 1.061863994 |
| DIETHYLTOLUAMIDE                      | 1.156528575 | 0.101704282 | 0.207138178 | 0.986142505 |
| SUCRALFATE                            | 1.156316845 | 0.10827582  | 0.076659383 | 1.253880777 |
| CYCLAMIC ACID                         | 1.156273493 | 0.303728449 | 0.227466318 | 1.091817311 |
| AMMONIUM LACTATE                      | 1.155600027 | 0.149519129 | 0.444308111 | 1.238980892 |
| RETINOL                               | 1.154405709 | 0.255126417 | 0.161123468 | 1.35659228  |
| ZALEPLON                              | 1.154003899 | 0.121961713 | 0.086255683 | 0.980794197 |
| ACETANILIDE                           | 1.153615688 | 0.482961206 | 0.440651855 | 0.976365359 |
| beta-CAROTENE                         | 1.153308219 | 0.185934419 | 0.151998525 | 1.194521348 |
| ACEPROMAZINE MALEATE                  | 1.153166692 | 0.084683307 | 0.176875772 | 1.31322976  |
| FUSIDIC ACID                          | 1.153002417 | 0.155836444 | 0.161583423 | 1.305770889 |
| ANTHRALIN                             | 1.152519618 | 0.053406425 | 0.097327837 | 1.220074919 |
| CANRENONE                             | 1.151477833 | 0.302302118 | 0.488247368 | 1.789788131 |
| FLUMETHASONE                          | 1.15146814  | 0.226481562 | 0.373188514 | 1.307992022 |
| CEFMENOXIME HYDROCHLORIDE             | 1.151275914 | 0.458220837 | 0.363387907 | 1.093485546 |
| LOMERIZINE HYDROCHLORIDE              | 1.150822471 | 0.173577185 | 0.339051666 | 1.265345673 |
| PHENTOLAMINE HYDROCHLORIDE            | 1.150408532 | 0.310434066 | 0.303842858 | 1.793761668 |
| PENICILLIN G POTASSIUM                | 1.149969149 | 0.378150104 | 0.375328861 | 1.184893977 |
| GLAFENINE                             | 1.149428564 | 0.09512169  | 0.179525319 | 1.195432188 |
| PHENOLPHTHALEIN                       | 1.149135994 | 0.198221173 | 0.141384933 | 1.267054194 |
| CELECOXIB                             | 1.148951839 | 0.254620834 | 0.266451074 | 1.84780068  |
| ERDOSTEINE                            | 1.148894395 | 0.35997069  | 0.333111208 | 0.991011385 |
| LEVOCARNITINE                         | 1.148620845 | 0.117271191 | 0.199408626 | 1.119908853 |
| DIAZOXIDE                             | 1.147585988 | 0.111046758 | 0.203858489 | 1.657211391 |
| FLUPHENAZINE HYDROCHLORIDE            | 1.146741373 | 0.232831517 | 0.265935606 | 1.319244896 |
| PHENYLPROPANOLAMINE HYDROCHLOR        | 1.146566812 | 0.219954197 | 0.326325256 | 1.077102223 |
| NITROGLYCERIN                         | 1.145823832 | 0.123382084 | 0.292434042 | 1.028529313 |
| ACEMETACIN                            | 1.14572793  | 0.064111859 | 0.181183807 | 1.286242072 |
| SEVOFLURANE                           | 1.145508657 | 0.227144118 | 0.332901193 | 1.047172201 |
| PAPAVERINE HYDROCHLORIDE              | 1.14525258  | 0.263295541 | 0.455542185 | 1.625453518 |
| DESOXYMETASONE                        | 1.145190076 | 0.143826209 | 0.220007833 | 1.207596564 |
| FLUCYTOSINE                           | 1.144496853 | 0.110920257 | 0.208819493 | 1.213079397 |
| ESTRAMUSTINE                          | 1.143853475 | 0.08226299  | 0.288465773 | 1.344387228 |
| AMITRIPTYLINE HYDROCHLORIDE           | 1.143844111 | 0.34358013  | 0.2983451   | 1.422085201 |
| LEVOBUNOLOL HYDROCHLORIDE             | 1.143708995 | 0.317399971 | 0.32684128  | 0.959418097 |
| CANDESARTAN CILEXTIL                  | 1.143516908 | 0.125466598 | 0.300325451 | 1.263161018 |
| DECAMETHONIUM BROMIDE                 | 1.141214114 | 0.400357019 | 0.543578358 | 1.23045179  |
| OXYBUTYRIN CHLORIDE                   | 1.139983415 | 0.154915895 | 0.164377081 | 1.20712011  |
| NONIVAMIDE                            | 1.139754502 | 0.261195715 | 0.411244504 | 0.908019641 |
| PHTHALYL-SULFATHIAZOLE                | 1.139392347 | 0.064962794 | 0.371721332 | 1.407242538 |
| PIPERACETAZINE                        | 1.138822767 | 0.187784795 | 0.400331034 | 1.406116421 |
| ENROFLOXACIN                          | 1.138202216 | 0.168813015 | 0.083296906 | 1.390852235 |
| SULFADIAZINE                          | 1.13792448  | 0.188703539 | 0.309244546 | 1.248319672 |
| BISOPROLOL FUMARATE                   | 1.137111458 | 0.294541116 | 0.333255449 | 1.051442208 |
| SULFATHIAZOLE                         | 1.136822687 | 0.081952083 | 0.274565803 | 1.049432011 |
| SARAFLOXACIN HYDROCHLORIDE            | 1.136489755 | 0.148054195 | 0.30206558  | 1.13030795  |
| TOLPERISONE HYDROCHLORIDE             | 1.13585344  | 0.183361844 | 0.390192276 | 1.237953294 |
| SULBACTAM                             | 1.13579336  | 0.156856156 | 0.503970006 | 1.205984832 |
| SULFASALAZINE                         | 1.13538818  | 0.157453259 | 0.304058328 | 1.169581556 |
| IDAZOXAN HYDROCHLORIDE                | 1.134655744 | 0.078545168 | 0.478558515 | 1.141977454 |
| DEHYDROCHOLATE SODIUM                 | 1.134548067 | 0.105207004 | 0.274292003 | 1.067846904 |
| BENURESTAT                            | 1.134121389 | 0.195331694 | 0.330259635 | 1.02888044  |
| SURAMIN HEXASODIUM                    | 1.13383522  | 0.362981648 | 0.521369978 | 1.268440603 |
| NORETHYNODREL                         | 1.133405482 | 0.33301908  | 0.322460414 | 1.508503058 |
| RETINYL PALMITATE                     | 1.133375637 | 0.236362277 | 0.305010185 | 1.689637872 |
| CEFDINIR                              | 1.132278702 | 0.059504531 | 0.291345483 | 1.3342213   |
| NORFLOXACIN                           | 1.13213686  | 0.205188412 | 0.222368367 | 1.091373793 |
| PROCYCLIDINE HYDROCHLORIDE            | 1.132015    | 0.207405661 | 0.338346564 | 1.545428256 |
| DEFEROXAMINE MESYLATE                 | 1.131260109 | 0.201337396 | 0.326005722 | 1.209667877 |
| DARIFENACIN HYDROBROMIDE              | 1.131104881 | 0.202658673 | 0.370104793 | 1.23820103  |
| DENATONIUM BENZOATE                   | 1.130996254 | 0.165240117 | 0.271701178 | 1.360705091 |
| ETHOTOIN                              | 1.130510473 | 0.180747441 | 0.524110055 | 1.057570852 |
| BUPIVACAINE HYDROCHLORIDE             | 1.130427414 | 0.237523188 | 0.316001776 | 1.914026427 |
| OXETHAZAINE                           | 1.130099278 | 0.447223471 | 0.455112703 | 1.633662754 |
| GLIPIZIDE                             | 1.129720496 | 0.389909482 | 0.42185455  | 1.018007225 |
| PENICILLAMINE                         | 1.128554744 | 0.335310498 | 0.420393892 | 1.195874497 |
| DAPSONE                               | 1.128431654 | 0.17235662  | 0.321890342 | 1.271524813 |
| IOTHALAMIC ACID                       | 1.127841323 | 0.172113252 | 0.286381534 | 1.231823528 |
| MONENSIN SODIUM (monensin A is shown) | 1.126933442 | 0.222437155 | 0.211032627 | 1.791632552 |

|                                 |             |             |             |             |
|---------------------------------|-------------|-------------|-------------|-------------|
| CARBETAPENTANE CITRATE          | 1.12613711  | 0.20808065  | 0.364567521 | 1.114112747 |
| ESCITALOPRAM OXALATE            | 1.125781554 | 0.125758083 | 0.153597581 | 1.441193496 |
| MAFENIDE HYDROCHLORIDE          | 1.124911936 | 0.22050403  | 0.258954035 | 0.996850879 |
| OXALIPLATIN                     | 1.124619997 | 0.090092578 | 0.137298721 | 1.269411429 |
| MEGLUMINE                       | 1.124390181 | 0.013858832 | 0.528029094 | 1.255412658 |
| PENTOXIFYLLINE                  | 1.124263789 | 0.394637322 | 0.355763921 | 1.224664581 |
| HYDROXYAMPHETAMINE HYDROBROMIDI | 1.12415414  | 0.209866139 | 0.25319043  | 1.074362997 |
| PIRACETAM                       | 1.123298378 | 0.131198903 | 0.08491147  | 1.053626999 |
| CINCHONIDINE                    | 1.123133659 | 0.196597886 | 0.39625371  | 0.913770389 |
| MICONAZOLE NITRATE              | 1.122857938 | 0.487199216 | 0.488517023 | 1.860709528 |
| NAPHAZOLINE HYDROCHLORIDE       | 1.122291301 | 0.189814818 | 0.316568423 | 1.019925451 |
| ADENOSINE PHOSPHATE             | 1.121856601 | 0.264621348 | 0.370845803 | 1.59435942  |
| BETAMETHASONE ACETATE           | 1.121641794 | 0.030113583 | 0.263801468 | 1.256519278 |
| NITARSONE                       | 1.121638154 | 0.217498211 | 0.410658251 | 1.026078915 |
| BENZYL ISOTHIOCYANATE           | 1.12150457  | 0.280134243 | 0.480352835 | 0.428536843 |
| RESERPINE                       | 1.120975674 | 0.15455188  | 0.354648069 | 1.329518897 |
| MORANTEL CITRATE                | 1.120966216 | 0.072890831 | 0.269874272 | 1.572113613 |
| NALIDIXIC ACID                  | 1.120527816 | 0.212986464 | 0.521279589 | 1.585288388 |
| ONDANSETRON                     | 1.120463914 | 0.058592526 | 0.542447115 | 1.256968965 |
| TAMSULOSIN HYDRCHLORIDE         | 1.120339685 | 0.153208463 | 0.390202348 | 0.945468525 |
| RESORCINOL                      | 1.120142932 | 0.075725648 | 0.143861607 | 1.029260937 |
| PROADIFEN HYDROCHLORIDE         | 1.119550681 | 0.31397756  | 0.325812599 | 1.230815582 |
| SIBUTRAMINE HYDROCHLORIDE       | 1.119219485 | 0.146921889 | 0.363854892 | 1.245177971 |
| BENZOYL PEROXIDE                | 1.118284371 | 0.084461779 | 0.133881997 | 1.300554513 |
| UNDECYLENIC ACID                | 1.117166042 | 0.313600093 | 0.417759562 | 1.164683656 |
| OXANTEL PAMOATE                 | 1.116969819 | 0.484091201 | 0.543645563 | 1.266086907 |
| SALICYL ALCOHOL                 | 1.116680961 | 0.362395102 | 0.478241651 | 1.356768758 |
| IODIPAMIDE                      | 1.116646707 | 0.076555726 | 0.296399474 | 1.654255028 |
| GALLIC ACID                     | 1.116285151 | 0.358812523 | 0.444700204 | 0.976042809 |
| TETRACYCLINE HYDROCHLORIDE      | 1.116248895 | 0.390905299 | 0.495397028 | 1.297726581 |
| ESTRADIOL BENZOATE              | 1.116045641 | 0.042433861 | 0.12430719  | 1.272493185 |
| DIMPYLATE                       | 1.115669791 | 0.246366534 | 0.567644331 | 1.404675121 |
| CARBINOXAMINE MALEATE           | 1.115476927 | 0.107173934 | 0.218126535 | 1.174583755 |
| ACEBUTOLOL HYDROCHLORIDE        | 1.115236474 | 0.258552113 | 0.550502787 | 1.345954832 |
| VILAZODONE HYDROCHLORIDE        | 1.114814567 | 0.228846791 | 0.496695373 | 1.508972506 |
| IDOQUINOL                       | 1.114803513 | 0.368660016 | 0.437672162 | 1.526535506 |
| RIMANTADINE HYDROCHLORIDE       | 1.114566831 | 0.308683862 | 0.516112578 | 1.241805315 |
| AZAPERONE                       | 1.11362413  | 0.140450787 | 0.383474698 | 1.155816952 |
| CITIOLONE                       | 1.112848909 | 0.082652829 | 0.448827512 | 1.006323958 |
| CILOSTAZOL                      | 1.112395937 | 0.137619908 | 0.387410169 | 1.097992435 |
| TENOFOVIR                       | 1.112027715 | 0.245247481 | 0.459550438 | 1.057958605 |
| MECLOFENOXATE HYDROCHLORIDE     | 1.111926007 | 0.249881701 | 0.498838394 | 1.172774079 |
| ISOSORBIDE DINITRATE            | 1.111040953 | 0.135699485 | 0.472629014 | 1.178630204 |
| AMINOTHIAZOLE                   | 1.110915859 | 0.110023079 | 0.314953208 | 1.003372847 |
| ATRACURIUM BESYLATE             | 1.110537634 | 0.142470918 | 0.34203293  | 1.109447949 |
| NATEGLINIDE                     | 1.110473883 | 0.352487147 | 0.496059463 | 1.174265994 |
| IMATINIB                        | 1.110286989 | 0.090248834 | 0.466470113 | 1.374258344 |
| CHLORPROMAZINE                  | 1.110121114 | 0.114261582 | 0.369096049 | 1.321689955 |
| METHYSERGIDE MALEATE            | 1.108099985 | 0.128894364 | 0.346079473 | 1.083330931 |
| IODIXANOL                       | 1.107919594 | 0.319283892 | 0.488084107 | 1.333678921 |
| IBUPROFEN                       | 1.107899198 | 0.32340155  | 0.432219512 | 1.464266615 |
| PANTHENOL (dl)                  | 1.106882778 | 0.10568437  | 0.250958459 | 1.166798003 |
| ACECAINIDE HYDROCHLORIDE        | 1.106677936 | 0.386886151 | 0.444121114 | 1.389104765 |
| DIHYDROSTREPTOMYCIN SULFATE     | 1.106584204 | 0.088375964 | 0.376135269 | 1.49366521  |
| FLOXURIDINE                     | 1.105928479 | 0.210303212 | 0.278769336 | 1.812771058 |
| VENLAFAXINE HYDROCHLORIDE       | 1.105773169 | 0.169418041 | 0.371931314 | 1.589306189 |
| ANTAZOLINE PHOSPHATE            | 1.105663043 | 0.191003303 | 0.314221207 | 1.212972459 |
| DESVENLAFAXINE SUCCINATE        | 1.105480259 | 0.235540262 | 0.348534323 | 0.905042441 |
| ADIPHENINE HYDROCHLORIDE        | 1.105354108 | 0.155459598 | 0.229351976 | 1.257019531 |
| CYPERMETHRIN                    | 1.104525499 | 0.170162481 | 0.591174185 | 1.059063327 |
| LEUCOVORIN CALCIUM              | 1.104429102 | 0.481380361 | 0.551285882 | 1.428729211 |
| FIROCOXIB                       | 1.104409807 | 0.211604839 | 0.286608767 | 1.640133767 |
| FLUCONAZOLE                     | 1.104292221 | 0.141975569 | 0.14778099  | 1.48298524  |
| NYSTATIN                        | 1.10412072  | 0.628667391 | 0.637155129 | 1.428452989 |
| TAZOBACTAM                      | 1.102917466 | 0.280445622 | 0.397565241 | 1.378014307 |
| BENFOTIAMINE                    | 1.101485011 | 0.139326433 | 0.369062551 | 1.062459438 |
| TICARCILLIN DISODIUM            | 1.101278684 | 0.191663363 | 0.40782655  | 0.968558041 |
| ACECLIDINE                      | 1.101129601 | 0.33223637  | 0.419619354 | 1.16209182  |
| ZAPRINAST                       | 1.100935431 | 0.154969569 | 0.379475202 | 1.046983788 |
| LAMOTRIGINE                     | 1.100290371 | 0.09010484  | 0.365572687 | 1.034501065 |
| ACETOHYDROXAMIC ACID            | 1.099655316 | 0.112089453 | 0.28599303  | 1.346638677 |
| SCOPOLAMINE HYDROBROMIDE        | 1.098821485 | 0.302908739 | 0.618604844 | 1.122898195 |



|                                  |             |             |             |             |
|----------------------------------|-------------|-------------|-------------|-------------|
| LONIDAMINE                       | 1.098806429 | 0.167668368 | 0.396006356 | 1.012637343 |
| SECNIDAZOLE                      | 1.098207952 | 0.224531359 | 0.543382704 | 1.231072657 |
| NAPROXOL                         | 1.097995746 | 0.231064939 | 0.442205505 | 1.680043032 |
| ARSENIC TRIOXIDE                 | 1.09780928  | 0.230952508 | 0.35043205  | 1.425945975 |
| BORNYL ACETATE                   | 1.09737161  | 0.122940726 | 0.519098665 | 1.07702996  |
| FAMCICLOVIR                      | 1.0969539   | 0.321498949 | 0.536766125 | 1.067081664 |
| REPAGLINIDE                      | 1.096873502 | 0.248231756 | 0.522247805 | 0.955449678 |
| PROPAFENONE HYDROCHLORIDE        | 1.096524655 | 0.150596596 | 0.18704147  | 1.684111221 |
| OLTIPRAZ                         | 1.096487791 | 0.086823651 | 0.516231504 | 1.246110942 |
| TRIMETHOPRIM                     | 1.096324327 | 0.4986384   | 0.606383688 | 1.414994576 |
| AMINOSALICYLATE SODIUM           | 1.096061849 | 0.22414114  | 0.384687604 | 1.182876255 |
| PYRITINOL                        | 1.095711184 | 0.040385761 | 0.514235887 | 1.117342087 |
| PIMETHIXENE MALEATE              | 1.095273487 | 0.45800331  | 0.683657211 | 1.339843805 |
| MOXISYLYTE HYDROCHORIDE          | 1.095000561 | 0.264682474 | 0.569659515 | 1.243297178 |
| IPRATROPIUM BROMIDE              | 1.094795368 | 0.128871603 | 0.635763429 | 1.221784016 |
| ORNIDAZOLE                       | 1.094578347 | 0.046389792 | 0.442301363 | 1.161769736 |
| CAPREOMYCIN SULFATE              | 1.093804121 | 0.318532915 | 0.471576465 | 1.255158532 |
| SPIRONOLACTONE                   | 1.093746423 | 0.116017731 | 0.45592997  | 1.745849219 |
| NIZATIDINE                       | 1.093656074 | 0.125174956 | 0.414125449 | 1.453558589 |
| BENZOIC ACID                     | 1.093643341 | 0.037893191 | 0.20414422  | 1.429872342 |
| CHINIOFON                        | 1.093627676 | 0.169458173 | 0.629815871 | 1.346178103 |
| ITRACONAZOLE                     | 1.093577314 | 0.250763188 | 0.656865323 | 1.397908397 |
| HYDROQUINIDINE                   | 1.093484741 | 0.033482283 | 0.372226176 | 1.506576855 |
| HYDROXYCHLOROQUINE SULFATE       | 1.093453386 | 0.229053152 | 0.299433055 | 1.659989963 |
| ROXITHROMYCIN                    | 1.093337876 | 0.410637345 | 0.569734468 | 1.419049016 |
| ROLIPRAM                         | 1.093353744 | 0.397544711 | 0.564334614 | 1.038013313 |
| ENOXACIN                         | 1.093315477 | 0.35609445  | 0.476222802 | 1.321933505 |
| ADIPIC ACID                      | 1.093305904 | 0.178854745 | 0.485913966 | 1.024017722 |
| CIPROFIBRATE                     | 1.093149668 | 0.332822494 | 0.554971126 | 1.446630189 |
| CYCLOPHOSPHAMIDE                 | 1.092815142 | 0.092240217 | 0.439705999 | 1.263883234 |
| DOXOFYLLINE                      | 1.092187701 | 0.153167665 | 0.611589408 | 1.081382463 |
| HETACILLIN POTASSIUM             | 1.091950199 | 0.330777136 | 0.506524929 | 1.451634902 |
| GUANFACINE HYDROCHLORIDE         | 1.091925867 | 0.229355974 | 0.472362323 | 1.149777251 |
| BENSERAZIDE HYDROCHLORIDE        | 1.091776572 | 0.104272953 | 0.319229347 | 1.456495384 |
| FLUTICASONE PROPIONATE           | 1.091503883 | 0.223085938 | 0.626771324 | 1.902599849 |
| ADENINE                          | 1.091121144 | 0.145386589 | 0.435256225 | 1.607133984 |
| LEVOMENTHOL                      | 1.090754644 | 0.161098651 | 0.555995834 | 1.145562696 |
| GEFITINIB                        | 1.090450566 | 0.458825862 | 0.662899626 | 1.190762396 |
| CAMPHOR (1R)                     | 1.090182324 | 0.09264137  | 0.321099066 | 1.353154541 |
| GLUTAMINE (L)                    | 1.09015796  | 0.244207386 | 0.549308072 | 1.18554592  |
| PYRAZINAMIDE                     | 1.090003285 | 0.20282497  | 0.506560151 | 1.244577827 |
| CLOFOCTOL                        | 1.089969555 | 0.189664991 | 0.450263092 | 1.192293003 |
| FLUMEQUINE                       | 1.089223676 | 0.196498185 | 0.470054495 | 1.387426562 |
| NYLIDRIN HYDROCHLORIDE           | 1.088904997 | 0.323152331 | 0.496233632 | 1.504925814 |
| MOXALACTAM DISODIUM              | 1.088883952 | 0.301972882 | 0.561377645 | 1.101779557 |
| HEPTAMINOL HYDROCHLORIDE         | 1.087780873 | 0.483658852 | 0.672651493 | 1.078198135 |
| TOREMIPHENE CITRATE              | 1.087699676 | 0.168821294 | 0.532470965 | 1.157048516 |
| METHSUXIMIDE                     | 1.087489788 | 0.146771065 | 0.364596109 | 1.176583177 |
| CHLORAMPHENICOL SODIUM SUCCINATE | 1.085916148 | 0.160983117 | 0.386519546 | 1.161775265 |
| TODRALAZINE HYDROCHLORIDE        | 1.085792095 | 0.10859982  | 0.566402102 | 1.117287888 |
| CHLORAMPHENICOL                  | 1.08572063  | 0.15546938  | 0.383589834 | 1.082134917 |
| BENZTHIAZIDE                     | 1.08566643  | 0.086926181 | 0.341923064 | 1.317214273 |
| FLUOCINOLONE ACETONIDE           | 1.085580663 | 0.30021116  | 0.515280933 | 1.488722956 |
| STRYCHNINE                       | 1.085216302 | 0.070644889 | 0.284310413 | 1.328399211 |
| NITRENDIPINE                     | 1.084868799 | 0.174427727 | 0.473082067 | 1.898124443 |
| DIPHENHYDRAMINE HYDROCHLORIDE    | 1.084857695 | 0.045156058 | 0.469298685 | 1.353229727 |
| ELTANOLONE                       | 1.084018182 | 0.195582357 | 0.59402087  | 1.373359627 |
| PRULIFLOXACIN                    | 1.083126898 | 0.152396453 | 0.587116735 | 1.166462752 |
| CLOPIDOL                         | 1.083038826 | 0.097481444 | 0.31173203  | 1.152347469 |
| CLOFIBRIC ACID                   | 1.082600036 | 0.202166049 | 0.49413606  | 1.037329973 |
| BETAMETHASONE 17,21-DIPROPIONATE | 1.081756126 | 0.077721329 | 0.281617623 | 1.380674985 |
| PENTAMIDINE ISETHIONATE          | 1.081653925 | 0.173386334 | 0.67430274  | 1.459784542 |
| AZATADINE MALEATE                | 1.081621709 | 0.060608923 | 0.678326713 | 1.304836134 |
| SUCCINYL-SULFATHIAZOLE           | 1.08158509  | 0.393487872 | 0.674644555 | 1.427553457 |
| TRANDOLAPRIL                     | 1.08121902  | 0.186209741 | 0.659156997 | 1.33251217  |
| HALAZONE                         | 1.081008811 | 0.267881652 | 0.515871228 | 1.294081805 |
| CLOXACILLIN SODIUM               | 1.080799402 | 0.083407943 | 0.497389603 | 1.241653532 |
| DIMERCAPROL                      | 1.080263435 | 0.280383259 | 0.508281653 | 1.569882536 |
| AMIODARONE HYDROCHLORIDE         | 1.080058949 | 0.070485738 | 0.286908428 | 1.695069532 |
| HYDRASTINE (1R, 9S)              | 1.079804194 | 0.132653028 | 0.487460334 | 1.558489739 |
| STREPTOMYCIN SULFATE             | 1.079403032 | 0.145271845 | 0.53520228  | 1.237897223 |
| CEFOXITIN SODIUM                 | 1.079085463 | 0.157989344 | 0.663218465 | 1.276692238 |

|                                   |             |             |             |              |
|-----------------------------------|-------------|-------------|-------------|--------------|
| CHOLINE CHLORIDE                  | 1.078736379 | 0.126403668 | 0.244178682 | 1.288061742  |
| PROCHLORPERAZINE EDISYLATE        | 1.078642053 | 0.185192214 | 0.55359353  | 1.368310726  |
| HALOPERIDOL                       | 1.078446159 | 0.509763312 | 0.666345044 | 1.686434899  |
| ISOTRETINON                       | 1.078396363 | 0.303662878 | 0.504453206 | 1.312627813  |
| TERCONAZOLE                       | 1.077913554 | 0.222049414 | 0.539910452 | 1.967826316  |
| HOMOSALATE                        | 1.077910678 | 0.111471092 | 0.231053728 | 1.419377002  |
| AMINOCAPROIC ACID                 | 1.077436513 | 0.146480225 | 0.423395088 | 1.244456621  |
| HALOTHANE                         | 1.077403305 | 0.217390736 | 0.443932272 | 1.160854953  |
| BICALUTAMIDE                      | 1.077384414 | 0.148227778 | 0.382693264 | 1.020642017  |
| COLISTIMETHATE SODIUM             | 1.077370737 | 0.235341803 | 0.571277539 | 1.294981701  |
| CEFSULODIN SODIUM                 | 1.077329493 | 0.290723631 | 0.498728998 | 1.409603153  |
| BISMUTH SUBSALICYLATE             | 1.076869701 | 0.331181312 | 0.600664191 | 1.012683178  |
| CAPTOPRIL                         | 1.076651299 | 0.398257029 | 0.63685489  | 1.580566962  |
| ANTIPYRINE                        | 1.076556025 | 0.18680396  | 0.457256685 | 1.190968912  |
| LINCOMYCIN HYDROCHLORIDE          | 1.076298857 | 0.133760835 | 0.455939895 | 1.357590532  |
| MEDRYSONE                         | 1.076080582 | 0.182214578 | 0.453624551 | 1.458526613  |
| THIAMPHENICOL                     | 1.075868884 | 0.108300768 | 0.337263585 | 1.297326354  |
| PIROCTONE OLAMINE                 | 1.075726139 | 0.264654245 | 0.568340041 | 1.516235206  |
| COLESEVALAM HYDROCHLORIDE (high r | 1.075433697 | 0.288674184 | 0.51740325  | 1.154405822  |
| FLUVOXAMINE MALEATE               | 1.074903628 | 0.018982108 | 0.66875995  | 0.973897654  |
| DEHYDROCHOLIC ACID                | 1.074677423 | 0.08743344  | 0.499661669 | 1.453263437  |
| CHLORAMBUCIL                      | 1.073577206 | 0.049707982 | 0.397189174 | 1.064322811  |
| FENOFIBRATE                       | 1.073360062 | 0.132946121 | 0.435114718 | 1.185794067  |
| DICYCLOMINE HYDROCHLORIDE         | 1.073187721 | 0.136025651 | 0.552704668 | 1.363969963  |
| MYCOPHENOLATE MOFETIL             | 1.07309484  | 0.334141794 | 0.740605144 | 0.858747611  |
| PIRENPERONE                       | 1.072942523 | 0.160908199 | 0.536574094 | 1.893681509  |
| DICHLOROPHEN                      | 1.072762075 | 0.29832147  | 0.675117619 | 1.134203833  |
| PYRIDOXINE                        | 1.072478025 | 0.15752807  | 0.534298357 | 1.134485784  |
| ROSIGLITAZONE MALEATE             | 1.072472473 | 0.286642334 | 0.483769185 | 1.278813274  |
| AMOXICILLIN                       | 1.071628519 | 0.099363518 | 0.429778089 | 1.375367979  |
| BROMPERIDOL                       | 1.071079447 | 0.304452789 | 0.742918885 | 1.868525593  |
| PROCARBAZINE HYDROCHLORIDE        | 1.070745977 | 0.09576583  | 0.689907683 | 1.56195654   |
| MECLOFENAMATE SODIUM              | 1.070381335 | 0.342135225 | 0.600882503 | 1.03880456   |
| THIAMINE                          | 1.069895101 | 0.069550436 | 0.518443132 | 1.060954315  |
| METHYLCLOTHIAZIDE                 | 1.069529579 | 0.293365418 | 0.64505934  | 1.054989491  |
| SUMATRIPTAN SUCCINATE             | 1.069462296 | 0.397531775 | 0.762986662 | 1.141536595  |
| CROMOLYN SODIUM                   | 1.069158623 | 0.217842126 | 0.604930053 | 1.236518527  |
| AZELAIC ACID                      | 1.067320383 | 0.04518742  | 0.533022501 | 1.356287786  |
| RACEPHEDRINE HYDROCHLORIDE        | 1.066472184 | 0.158645198 | 0.631935737 | 1.334421109  |
| KETOCONAZOLE                      | 1.066419687 | 0.442787206 | 0.686326993 | 1.660661627  |
| CLORSULON                         | 1.066314555 | 0.137137014 | 0.74029418  | 1.217475426  |
| PROTIRELIN                        | 1.066086699 | 0.072774845 | 0.262592714 | 1.364169541  |
| PHENACEMIDE                       | 1.065559314 | 0.424213514 | 0.671802617 | 1.059331585  |
| AMIFOSTINE                        | 1.065319585 | 0.044005841 | 0.367793252 | 1.337454602  |
| SULFABENZAMIDE                    | 1.065227344 | 0.117760628 | 0.601686068 | 1.167613514  |
| XYLOMETAZOLINE HYDROCHLORIDE      | 1.064723475 | 0.209528249 | 0.603803346 | 1.1670596895 |
| GUANIDINE HYDROCHLORIDE           | 1.064611508 | 0.240796547 | 0.747356687 | 1.076123353  |
| POTASSIUM p-AMINOBENZOATE         | 1.064113174 | 0.032834659 | 0.714156949 | 1.369108368  |
| PYRIMETHAMINE                     | 1.063702854 | 0.265935471 | 0.659609413 | 1.357791785  |
| CHLORAMPHENICOL PALMITATE         | 1.063586545 | 0.084453781 | 0.474864678 | 1.09109147   |
| TADALAFIL                         | 1.063380299 | 0.110786462 | 0.636933376 | 1.067907248  |
| SULFANILAMIDE                     | 1.063248217 | 0.327328267 | 0.72268793  | 1.002838226  |
| CYTISINE                          | 1.062745312 | 0.281393692 | 0.713242655 | 1.316249712  |
| TRIENTINE HYDROCHLORIDE           | 1.062679337 | 0.232728037 | 0.623208419 | 0.925300963  |
| TAMOXIFEN CITRATE                 | 1.062373842 | 0.049024778 | 0.604784404 | 1.72220548   |
| TOLAZOLINE HYDROCHLORIDE          | 1.060666985 | 0.214760628 | 0.656439583 | 1.305491423  |
| CITALOPRAM HYDROBROMIDE           | 1.060660426 | 0.050335906 | 0.430619173 | 1.353141054  |
| SULINDAC                          | 1.060492439 | 0.121656418 | 0.628943433 | 1.385750516  |
| SILDENAFIL CITRATE                | 1.060486271 | 0.335186148 | 0.765188003 | 1.934604994  |
| ORNITHINE HYDROCHLORIDE           | 1.060199128 | 0.287416388 | 0.656574212 | 1.036947948  |
| BETAMETHASONE VALERATE            | 1.060197017 | 0.262702583 | 0.534643918 | 1.296498198  |
| EZETIMIBE                         | 1.060129158 | 0.104569726 | 0.631314703 | 1.056943974  |
| ETHACRYNIC ACID                   | 1.059641922 | 0.425596931 | 0.709383686 | 1.654379759  |
| TRILOSTANE                        | 1.058815082 | 0.13443225  | 0.493132082 | 1.428864012  |
| BIFONAZOLE                        | 1.05876815  | 0.276644536 | 0.690754248 | 1.142908879  |
| QUINACRINE HYDROCHLORIDE          | 1.058544009 | 0.198142706 | 0.662094862 | 1.556831221  |
| CYCLOSPORINE                      | 1.058321443 | 0.053136366 | 0.423037098 | 1.027956108  |
| LEVAMISOLE HYDROCHLORIDE          | 1.058238925 | 0.065808284 | 0.455022338 | 1.331883969  |
| CAFFEINE                          | 1.057951449 | 0.095474452 | 0.518818218 | 1.135700288  |
| PYRILAMINE MALEATE                | 1.057910208 | 0.056421618 | 0.63140408  | 1.245261615  |
| BAMBUTEROL HYDROCHLORIDE          | 1.057879855 | 0.15198444  | 0.763268501 | 1.494224726  |
| GLUTATHIONE                       | 1.05574621  | 0.082978115 | 0.705182413 | 1.152984916  |

|                                   |              |             |             |             |
|-----------------------------------|--------------|-------------|-------------|-------------|
| FLUDARABINE PHOSPHATE             | 1.055528886  | 0.180404375 | 0.64136641  | 0.759229781 |
| AZLOCILLIN SODIUM                 | 1.055372163  | 0.165763224 | 0.454798515 | 1.063046627 |
| OXIDOPAMINE HYDROCHLORIDE         | 1.055363831  | 0.187674658 | 0.612552594 | 1.485003912 |
| VIDARABINE                        | 1.054814362  | 0.126334447 | 0.629152157 | 1.1846823   |
| CHLORHEXIDINE DIHYDROCHLORIDE     | 1.054768048  | 0.279388933 | 0.6491485   | 1.339179658 |
| THIOGUANINE                       | 1.054401996  | 0.037621192 | 0.650126866 | 1.285021332 |
| METHYLDOPA                        | 1.054160342  | 0.16281655  | 0.64555141  | 1.532548116 |
| MOLSIDOMINE                       | 1.053823968  | 0.261315452 | 0.798765675 | 0.922710874 |
| ACETAMINOPHEN                     | 1.053159445  | 0.055336574 | 0.489980144 | 1.301333531 |
| DIBUCAINE HYDROCHLORIDE           | 1.053113145  | 0.252272957 | 0.702099904 | 1.442005142 |
| CHLOROPHYLLIDE Cu COMPLEX Na SALT | 1.053061987  | 0.206922173 | 0.588978546 | 1.281169356 |
| NETILMICIN SULFATE                | 1.052337772  | 0.155716257 | 0.651405466 | 1.111544231 |
| NORGESTIMATE                      | 1.052333737  | 0.260083954 | 0.692177872 | 1.548126645 |
| ACETYL-L-LEUCINE                  | 1.052085764  | 0.127569089 | 0.635625696 | 0.987388358 |
| HYDROCHLOROTHIAZIDE               | 1.051739302  | 0.334015647 | 0.707870253 | 1.568055057 |
| CARBACHOL                         | 1.051709453  | 0.085619377 | 0.559879731 | 0.950601751 |
| PYRANTEL PAMOATE                  | 1.051144123  | 0.232967783 | 0.712811609 | 1.386096863 |
| ADRENOLONE HYDROCHLORIDE          | 1.050748024  | 0.044196076 | 0.36028788  | 1.820721202 |
| ACEDAPSONE                        | 1.050712958  | 0.02969123  | 0.352646189 | 1.215284285 |
| PRALIDOXIME CHLORIDE              | 1.050638947  | 0.072561669 | 0.638754783 | 1.018316748 |
| DIMETHYL FUMARATE                 | 1.050599041  | 0.113699406 | 0.429534507 | 1.669799052 |
| OXFENDAZOLE                       | 1.050550161  | 0.224011541 | 0.687875201 | 1.338227347 |
| TIGECYCLINE                       | 1.050415565  | 0.152076345 | 0.714331466 | 0.969331245 |
| PRAMOXINE HYDROCHLORIDE           | 1.05026865   | 0.157957345 | 0.71633775  | 1.060015316 |
| GLIMEPIRIDE                       | 1.050089889  | 0.078134183 | 0.799120743 | 1.159759966 |
| CEFEPIME HYDROCHLORIDE            | 1.049907631  | 0.111277579 | 0.544546658 | 1.195147177 |
| SULFANILATE ZINC                  | 1.049713117  | 0.108305998 | 0.544271427 | 1.40645279  |
| CARBARSONE                        | 1.048993395  | 0.346565301 | 0.76977797  | 1.033401697 |
| MEVASTATIN                        | 1.047848407  | 0.134927033 | 0.665415698 | 1.144853336 |
| NIACIN                            | 1.046856037  | 0.509057811 | 0.790912889 | 1.105521484 |
| CEPHAPIRIN SODIUM                 | 1.046821523  | 0.080629589 | 0.595157614 | 1.179433201 |
| SACCHARIN                         | 1.046433433  | 0.23865445  | 0.78288281  | 1.6378778   |
| DIETHYLSTILBESTROL                | 1.04639035   | 0.131574093 | 0.704092317 | 1.558349504 |
| TOLTRAZURIL                       | 1.046302666  | 0.40465538  | 0.7757589   | 1.106771752 |
| SISOMICIN SULFATE                 | 1.045820889  | 0.045814538 | 0.702622438 | 1.543065171 |
| EPINEPHRINE BITARTRATE            | 1.045610429  | 0.19298479  | 0.724743861 | 1.900865051 |
| QUINIDINE GLUCONATE               | 1.045517561  | 0.123858869 | 0.71588589  | 1.766366869 |
| RITONAVIR                         | 1.044713686  | 0.452287555 | 0.782055239 | 1.362377961 |
| LAMIVUDINE                        | 1.04441546   | 0.276333568 | 0.818735986 | 1.436042562 |
| CHLORPYRIFOS                      | 1.044413282  | 0.325640896 | 0.756028292 | 1.157397102 |
| AKLOMIDE                          | 1.044408209  | 0.15824227  | 0.603287286 | 1.269275303 |
| ZILEUTON                          | 1.044325211  | 0.047571418 | 0.820943633 | 1.14531896  |
| SULFAMETHOXAZOLE                  | 1.044277472  | 0.112386636 | 0.721080237 | 1.17614609  |
| ETHOPABATE                        | 1.044088202  | 0.122411529 | 0.804803924 | 1.109854311 |
| PHENACETIN                        | 1.043800161  | 0.088673455 | 0.690139954 | 1.522382736 |
| LOMUSTINE                         | 1.04372297   | 0.122715228 | 0.779837366 | 1.428297973 |
| SULCONAZOLE NITRATE               | 1.043385187  | 0.175549525 | 0.756965781 | 1.272788837 |
| CLARITHROMYCIN                    | 1.043350732  | 0.147263831 | 0.535146215 | 1.269551749 |
| THIODIGLYCOL                      | 1.0433112271 | 0.282730911 | 0.746750003 | 1.01976098  |
| AMINOPYRINE                       | 1.043267679  | 0.246069772 | 0.73372163  | 1.005041601 |
| BUTYLATED HYDROXYTOLUENE          | 1.04287718   | 0.253769545 | 0.738801405 | 1.037645267 |
| HYDROCORTISONE HEMISUCCINATE      | 1.042398362  | 0.122361987 | 0.671475987 | 1.267302335 |
| LEVOFLOXACIN                      | 1.042169721  | 0.21580649  | 0.759258703 | 1.220405827 |
| STREPTOZOSIN                      | 1.041918999  | 0.169851734 | 0.747009027 | 1.11382634  |
| HEXESTROL                         | 1.041138217  | 0.113887349 | 0.703974543 | 1.186266049 |
| OROTIC ACID                       | 1.040222002  | 0.39098242  | 0.798368029 | 1.062483283 |
| SALICYLAMIDE                      | 1.040069786  | 0.088496777 | 0.742831627 | 1.394778641 |
| MEFLOQUINE                        | 1.039873896  | 0.392132616 | 0.774159592 | 1.54707525  |
| AVOBENZONE                        | 1.039608661  | 0.189095685 | 0.767279398 | 1.364767466 |
| CEFADROXIL                        | 1.03913514   | 0.125031739 | 0.672719352 | 1.303085517 |
| PENTETIC ACID                     | 1.038908016  | 0.215970527 | 0.814156177 | 1.148697443 |
| FAMPRIDINE                        | 1.03878571   | 0.130591109 | 0.631294541 | 1.104468897 |
| ESTRADIOL DIPROPIONATE            | 1.038700882  | 0.161499655 | 0.763986933 | 1.314977291 |
| CHLOROCRESOL                      | 1.038204181  | 0.179631741 | 0.680161316 | 1.070877274 |
| AMINOLEVULINIC ACID HYDROCHLORIDE | 1.037780053  | 0.129670797 | 0.569314925 | 1.386074215 |
| ORPHENADRINE CITRATE              | 1.037732646  | 0.190840901 | 0.775941043 | 1.162954463 |
| PANTOTHENIC ACID(d) Na salt       | 1.037731748  | 0.117227275 | 0.680585217 | 1.102650464 |
| ELETRIPTAN HYDROBROMIDE           | 1.037708555  | 0.132523276 | 0.849997306 | 1.125588519 |
| FOMEPIZOLE                        | 1.037394704  | 0.179992752 | 0.790308363 | 0.921956334 |
| CARMUSTINE                        | 1.03738508   | 0.041682309 | 0.600451629 | 1.530607094 |
| BETAXALOL HYDROCHLORIDE           | 1.03737462   | 0.309938903 | 0.863254176 | 0.974652533 |
| CARBAMAZEPINE                     | 1.037094445  | 0.062345493 | 0.667943351 | 1.25826589  |

|                              |             |             |             |             |
|------------------------------|-------------|-------------|-------------|-------------|
| CLOSANTEL                    | 1.036533896 | 0.28397331  | 0.749594652 | 1.372983279 |
| AZILSARTAN KAMEDOXOMIL       | 1.036157204 | 0.117907702 | 0.646810823 | 1.513488729 |
| DEMECLOCYCLINE HYDROCHLORIDE | 1.036142735 | 0.227212981 | 0.788095245 | 0.973657737 |
| DYCLONINE HYDROCHLORIDE      | 1.035680422 | 0.092067829 | 0.763383615 | 1.382870892 |
| SULFAMETHIZOLE               | 1.035622613 | 0.073349691 | 0.768657015 | 1.258093394 |
| BENDROFLUMETHIAZIDE          | 1.035573956 | 0.02177607  | 0.613840279 | 1.355990364 |
| CEFAMANDOLE SODIUM           | 1.035332771 | 0.067691773 | 0.84048743  | 1.372127379 |
| QUINAPRILAT                  | 1.03529629  | 0.250982739 | 0.852977269 | 1.293178546 |
| CEPHALOSPORIN C SODIUM       | 1.035127661 | 0.160559326 | 0.818294508 | 1.019146053 |
| ECAMSULE TRIETHANOLAMINE     | 1.035028139 | 0.153794952 | 0.846169657 | 1.43390753  |
| PARAMETHADIONE               | 1.034367538 | 0.125904974 | 0.862855562 | 1.050613991 |
| HOMATROPINE METHYLBROMIDE    | 1.034302022 | 0.246874374 | 0.773898334 | 1.408029902 |
| TAPENTADOL HYDROCHLORIDE     | 1.034272746 | 0.286397983 | 0.826338429 | 1.02870531  |
| TIMOLOL MALEATE              | 1.034073281 | 0.321279025 | 0.825213741 | 1.15710743  |
| NORETHINDRONE                | 1.034042339 | 0.613489735 | 0.868278676 | 1.439579135 |
| BUFEXAMAC                    | 1.033924788 | 0.353646919 | 0.81976229  | 1.402763188 |
| FENDILINE HYDROCHLORIDE      | 1.033650769 | 0.121023137 | 0.821845111 | 1.139323435 |
| BRUCINE                      | 1.033631652 | 0.092953661 | 0.673322057 | 1.611840449 |
| METITEPINE MALEATE           | 1.03345937  | 0.086175991 | 0.858751697 | 1.173924672 |
| BUTOCONAZOLE                 | 1.033401815 | 0.332290537 | 0.879343238 | 1.526124932 |
| ANETHOLE                     | 1.032781264 | 0.243435356 | 0.797789853 | 1.726293203 |
| SULFAPYRIDINE                | 1.032574335 | 0.183059471 | 0.804318937 | 1.451664161 |
| LACITOL                      | 1.032360622 | 0.361897353 | 0.860358501 | 1.095032812 |
| ETIDRONATE DISODIUM          | 1.032278301 | 0.119053506 | 0.771824766 | 1.259990627 |
| TIOCONAZOLE                  | 1.032265447 | 0.162157854 | 0.781420351 | 1.390243035 |
| BUTAMBEN                     | 1.032014177 | 0.232310729 | 0.80219671  | 0.889199454 |
| DACARBAZINE                  | 1.031953132 | 0.035325317 | 0.805539437 | 1.031166311 |
| METHYLBENZETHONIUM CHLORIDE  | 1.031753589 | 0.105386116 | 0.770683164 | 2.450990636 |
| SENNOSIDE A                  | 1.031741483 | 0.24494761  | 0.847395739 | 1.293146106 |
| FENOTEROL HYDROBROMIDE       | 1.031689601 | 0.157074006 | 0.785778708 | 1.664110688 |
| CHLORMEZANONE                | 1.031656597 | 0.246393383 | 0.832490958 | 1.038385855 |
| ACADESINE                    | 1.031503509 | 0.226892149 | 0.844411439 | 1.28789069  |
| DIATRIZOIC ACID              | 1.031335245 | 0.202329873 | 0.764272879 | 1.288811182 |
| HOMATROPINE HYDROBROMIDE     | 1.031229868 | 0.41253262  | 0.841707498 | 1.669059124 |
| PRASTERONE ACETATE           | 1.030850297 | 0.068646744 | 0.869181256 | 1.969863494 |
| ERGOCALCIFEROL               | 1.030766929 | 0.099032994 | 0.795945454 | 1.22117945  |
| KETANSERIN TARTRATE          | 1.030621038 | 0.15167423  | 0.812635102 | 1.121325566 |
| AMPHOTERICIN B               | 1.029801012 | 0.073162383 | 0.732287951 | 1.257107088 |
| NICOTINYL ALCOHOL TARTRATE   | 1.028773402 | 0.233048997 | 0.773308942 | 1.58461863  |
| DILOXANIDE FUROATE           | 1.028439806 | 0.035110058 | 0.787843794 | 1.07206496  |
| ZIDOVUDINE [AZT]             | 1.028381727 | 0.131117546 | 0.724986261 | 1.98604037  |
| IFOSFAMIDE                   | 1.027910322 | 0.133556164 | 0.888664782 | 1.058464189 |
| EPIESTRIOL                   | 1.0279052   | 0.147037827 | 0.884119647 | 1.048996757 |
| PIPAMPERONE                  | 1.027902025 | 0.207976763 | 0.820334716 | 1.016812897 |
| NITROMIDE                    | 1.027719517 | 0.230202151 | 0.811387344 | 1.445299448 |
| OXACILLIN SODIUM             | 1.026906615 | 0.132686596 | 0.773311957 | 1.265548056 |
| SPARTEINE SULFATE            | 1.026618525 | 0.341578812 | 0.820109044 | 1.643978087 |
| ARTEMETHER                   | 1.026516915 | 0.336470424 | 0.841224124 | 1.044844958 |
| IVERMECTIN                   | 1.026409588 | 0.209567594 | 0.897682285 | 1.010886925 |
| CEFOTAXIME SODIUM            | 1.026244975 | 0.072044819 | 0.762826079 | 1.21633969  |
| CEFPROZIL                    | 1.025740007 | 0.2046743   | 0.889420561 | 1.394634204 |
| CIANIDANOL                   | 1.025677256 | 0.18120703  | 0.825255148 | 1.091896899 |
| DOXIFLURIDINE                | 1.02541333  | 0.316412867 | 0.885113906 | 1.138877998 |
| TROCLOSENE POTASSIUM         | 1.025394213 | 0.425081042 | 0.898807952 | 1.610129225 |
| CLAVULANATE LITHIUM          | 1.024767283 | 0.057177432 | 0.899394275 | 1.025671071 |
| ACETYLCYCHOLINE CHLORIDE     | 1.024466722 | 0.172252118 | 0.805242912 | 1.167523909 |
| CISPLATIN                    | 1.023763502 | 0.084339195 | 0.762651302 | 1.123183285 |
| MINAPRINE HYDROCHLORIDE      | 1.023454111 | 0.100039564 | 0.894513163 | 0.992865474 |
| CEFPODOXIME PROXETIL         | 1.02318228  | 0.137958852 | 0.837755741 | 1.109780805 |
| BROMHEXINE HYDROCHLORIDE     | 1.022659806 | 0.281536764 | 0.838061793 | 1.606175076 |
| CLIMBAZOLE                   | 1.022326506 | 0.1277043   | 0.881562026 | 1.369363462 |
| NICOPHOLINE                  | 1.022218246 | 0.073810962 | 0.881143923 | 1.05183725  |
| ATOMOXETINE HYDROCHLORIDE    | 1.022135839 | 0.088753489 | 0.709235666 | 1.264038879 |
| CHLOROBUTANOL                | 1.021811445 | 0.28694257  | 0.89854418  | 1.138295085 |
| MODAFINIL                    | 1.0214163   | 0.12953562  | 0.874101445 | 1.13528754  |
| HYDROFLUMETHIAZIDE           | 1.020941396 | 0.254788709 | 0.862357809 | 1.497966994 |
| PRILOCAINE HYDROCHLORIDE     | 1.020887321 | 0.114399005 | 0.848923647 | 1.410952563 |
| METHOCARBAMOL                | 1.020653224 | 0.280922138 | 0.862889483 | 1.034056283 |
| 2-THIOURACIL                 | 1.020582949 | 0.40977204  | 0.898685418 | 1.048909651 |
| CINOXACIN                    | 1.020300701 | 0.065150222 | 0.861843448 | 1.454655776 |
| ETHISTERONE                  | 1.019010744 | 0.074450735 | 0.740667693 | 1.347680588 |
| BUSULFAN                     | 1.018669532 | 0.103866169 | 0.835356743 | 1.239122326 |

|                                  |             |             |             |             |
|----------------------------------|-------------|-------------|-------------|-------------|
| TYLOSIN TARTRATE                 | 1.018634784 | 0.085978107 | 0.879858287 | 1.224406569 |
| GLYCOPYRROLATE                   | 1.018576591 | 0.202902107 | 0.927693615 | 1.062192591 |
| SULFISOXAZOLE ACETYL             | 1.018172455 | 0.103401182 | 0.868390875 | 1.084936267 |
| MILRINONE                        | 1.0179223   | 0.039032006 | 0.811653098 | 1.542121397 |
| CORTISONE                        | 1.017801015 | 0.146871792 | 0.873269076 | 1.166223725 |
| DUTASTERIDE                      | 1.017410116 | 0.142404247 | 0.922750098 | 1.130067519 |
| CAPSAICIN                        | 1.017368992 | 0.113235822 | 0.823642836 | 1.230404157 |
| FLUOCINONIDE                     | 1.017024543 | 0.394154452 | 0.910682962 | 1.636520779 |
| CYCLOPENTOLATE HYDROCHLORIDE     | 1.016735572 | 0.31193628  | 0.910760523 | 1.127008176 |
| PALIPERIDONE                     | 1.016206826 | 0.305238631 | 0.927447091 | 1.38856913  |
| MEFEXAMIDE HYDROCHLORIDE         | 1.01599587  | 0.162697667 | 0.868906504 | 1.412769217 |
| TRAMADOL HYDROCHLORIDE           | 1.015817627 | 0.182730035 | 0.836786607 | 1.437549314 |
| LEVOCARNITINE PROPIONATE HYDROCH | 1.01579192  | 0.217724097 | 0.899637937 | 1.297863256 |
| NEOSTIGMINE BROMIDE              | 1.015754203 | 0.174554017 | 0.857700962 | 1.318771849 |
| AMOXAPINE                        | 1.015744265 | 0.070023224 | 0.892844461 | 1.118356633 |
| METHYLTHIOURACIL                 | 1.01558361  | 0.295301263 | 0.903906725 | 1.644010668 |
| PANTETHINE                       | 1.015436286 | 0.275149004 | 0.926490032 | 1.098309148 |
| MUPIROCIN                        | 1.014905013 | 0.056195304 | 0.93213165  | 1.414763994 |
| DIHYDROERGOTAMINE MESYLATE       | 1.014860274 | 0.178482936 | 0.906991784 | 1.992330776 |
| PENBUTOLOL SULFATE               | 1.014772636 | 0.266202004 | 0.944278678 | 1.300862751 |
| DIMETHADIONE                     | 1.014725231 | 0.092866638 | 0.900981934 | 1.267431139 |
| AMINOHIPPURIC ACID               | 1.01468076  | 0.088717    | 0.844563455 | 1.339071502 |
| CYPROTERONE ACETATE              | 1.014278603 | 0.113267089 | 0.942544523 | 1.586249923 |
| HYDROXYPROGESTERONE              | 1.014275703 | 0.06331844  | 0.890778438 | 1.441908077 |
| TESTOSTERONE                     | 1.014063234 | 0.222904701 | 0.89653654  | 1.322195227 |
| LEVONORGESTREL                   | 1.013839863 | 0.160192017 | 0.886792275 | 1.498282352 |
| ARSANILIC ACID                   | 1.013489328 | 0.120718907 | 0.870706452 | 1.3093563   |
| SULFAQUINOXALINE SODIUM          | 1.0129816   | 0.07201905  | 0.941051584 | 1.338424582 |
| PROCAINAMIDE HYDROCHLORIDE       | 1.012870463 | 0.19749809  | 0.923046051 | 1.333417304 |
| HYDROCORTISONE VALERATE          | 1.012760714 | 0.496789187 | 0.952570732 | 2.132905395 |
| CEPHALOTHIN SODIUM               | 1.012598642 | 0.120209218 | 0.890674169 | 1.17399994  |
| FLURANDRENOLIDE                  | 1.012366092 | 0.260545821 | 0.942418155 | 1.199969183 |
| RANOLAZINE                       | 1.012181982 | 0.094062944 | 0.839044128 | 1.106571346 |
| SODIUM OXYBATE                   | 1.011965492 | 0.060303959 | 0.926930985 | 0.929706877 |
| ACETRIAZOIC ACID                 | 1.011923899 | 0.124816657 | 0.914174138 | 1.239325216 |
| FTAXILIDE                        | 1.011907724 | 0.37299895  | 0.956475669 | 1.180741379 |
| DIMENHYDRINATE                   | 1.011730943 | 0.127786146 | 0.92297971  | 1.167727164 |
| ACETAMINOSALOL                   | 1.011420237 | 0.153804097 | 0.919089971 | 0.945086134 |
| PROBUCOL                         | 1.011375905 | 0.174167496 | 0.908267349 | 1.180687538 |
| RAMOPLANIN [A2 shown; 2mM]       | 1.011352542 | 0.157803462 | 0.94990968  | 1.488949074 |
| URETHANE                         | 1.01070902  | 0.110636004 | 0.89549914  | 1.069546135 |
| MYCOPHENOLIC ACID                | 1.01055124  | 0.134312141 | 0.926063596 | 1.50140794  |
| SPIRAMYCIN                       | 1.010392057 | 0.076209722 | 0.887627873 | 1.180014015 |
| TERPENE HYDRATE                  | 1.010362146 | 0.192589529 | 0.949179052 | 1.522167576 |
| DONEPEZIL HYDROCHLORIDE          | 1.010319861 | 0.160539555 | 0.936736461 | 1.495174411 |
| RIBOFLAVIN                       | 1.009174212 | 0.198331162 | 0.955174953 | 1.330999242 |
| FENOLDIPAM MESYLATE              | 1.009123693 | 0.072850411 | 0.952499867 | 1.437710049 |
| TAURINE                          | 1.008594714 | 0.219994691 | 0.945027923 | 1.069253126 |
| SODIUM SALICYLATE                | 1.007712958 | 0.206748239 | 0.954277625 | 1.459696722 |
| INDAPAMIDE                       | 1.007259225 | 0.20941164  | 0.948439329 | 1.367465651 |
| PILOCARPINE NITRATE              | 1.006366259 | 0.234137352 | 0.963376937 | 1.333280924 |
| BETHANECHOL CHLORIDE             | 1.005584014 | 0.048552624 | 0.947764662 | 1.430141908 |
| CHROMOCARB                       | 1.005104237 | 0.176276127 | 0.964733748 | 0.969146916 |
| URACIL                           | 1.004794894 | 0.04584488  | 0.955062838 | 1.186582117 |
| MECLOCYCLINE SULFOSALICYLATE     | 1.004789661 | 0.207795293 | 0.979385668 | 1.116831731 |
| POLYMYXIN B SULFATE              | 1.004620731 | 0.194072665 | 0.972230648 | 1.343964983 |
| MODALINE SULFATE                 | 1.004194119 | 0.167444755 | 0.954415279 | 1.312649529 |
| TOLAZAMIDE                       | 1.0039695   | 0.313400569 | 0.982334184 | 1.612079849 |
| SULFACETAMIDE                    | 1.003964167 | 0.054503771 | 0.973626318 | 1.181602449 |
| RITODRINE HYDROCHLORIDE          | 1.003782286 | 0.225798023 | 0.97939272  | 1.421171319 |
| ISONIAZID                        | 1.003708979 | 0.291648706 | 0.976929514 | 1.41110703  |
| ANASTROZOLE                      | 1.003638284 | 0.052903917 | 0.961764551 | 1.26242017  |
| FLUROTHYL                        | 1.003194933 | 0.136489992 | 0.987219673 | 1.04666342  |
| MESORIDAZINE BESYLATE            | 1.002916087 | 0.173680264 | 0.976409944 | 1.413791364 |
| DESLOMATIDINE                    | 1.002665578 | 0.100884711 | 0.987974269 | 1.198882167 |
| ACEGLUTAMIDE                     | 1.001510542 | 0.188508057 | 0.992256816 | 1.195442336 |
| TULOBUTEROL HYDROCHLORIDE        | 1.001499966 | 0.237761318 | 0.992604613 | 1.606621533 |
| AMIKACIN SULFATE                 | 1.001498664 | 0.132550204 | 0.987169352 | 1.280654584 |
| CEFUROXIME SODIUM                | 1.00148841  | 0.397451871 | 0.994407007 | 1.587060114 |
| TOPIRAMATE                       | 1.001128625 | 0.187065587 | 0.988406111 | 1.165363793 |
| PROPIOLACTONE                    | 1.000482231 | 0.162029578 | 0.99568491  | 1.148964541 |
| ATORVASTATIN CALCIUM             | 1.000247129 | 0.170799659 | 0.997338425 | 1.362565658 |

|                                 |             |             |             |             |
|---------------------------------|-------------|-------------|-------------|-------------|
| MOXIFLOXACIN HYDROCHLORIDE      | 0.999945992 | 0.187563231 | 0.999676815 | 1.05267266  |
| PINDOLOL                        | 0.999866024 | 0.282371354 | 0.999271799 | 1.495332222 |
| SULBENTINE                      | 0.99986279  | 0.230712449 | 0.999117687 | 1.075438465 |
| METARAMINOL BITARTRATE          | 0.999851725 | 0.081735466 | 0.99889204  | 1.730980907 |
| PIOGLITAZONE HYDROCHLORIDE      | 0.999824018 | 0.238587355 | 0.999002375 | 1.488070156 |
| SUCRALOSE                       | 0.999301428 | 0.22586298  | 0.996193694 | 1.043110906 |
| THONZYLAMINE HYDROCHLORIDE      | 0.99908494  | 0.123542261 | 0.9907917   | 1.198632937 |
| PREGNENOLONE SUCCINATE          | 0.998662897 | 0.120034439 | 0.990403122 | 1.215178987 |
| PIPEMIDIC ACID                  | 0.998637634 | 0.062976366 | 0.992547976 | 1.202922087 |
| TOLBUTAMIDE                     | 0.998557215 | 0.172656482 | 0.991140963 | 1.202004835 |
| IOXILAN                         | 0.998053754 | 0.013407692 | 0.987108163 | 1.18875656  |
| PALMIDROL                       | 0.998011145 | 0.328783311 | 0.988923398 | 1.075937563 |
| MEROPENEM                       | 0.997968864 | 0.242929588 | 0.991439601 | 1.050131803 |
| OXINIC ACID                     | 0.997532108 | 0.200718098 | 0.987464085 | 1.132745483 |
| TROPISETRON HYDROCHLORIDE       | 0.997447106 | 0.132248914 | 0.986433487 | 1.155899179 |
| METHAPYRILENE HYDROCHLORIDE     | 0.997208814 | 0.229347003 | 0.977478281 | 1.431350922 |
| ETHOSUXIMIDE                    | 0.997162188 | 0.424315103 | 0.98462445  | 1.367251306 |
| METACETAMOL                     | 0.995976738 | 0.355540656 | 0.98225459  | 1.131950405 |
| RIVASTIGMINE TARTRATE           | 0.995959125 | 0.141399457 | 0.983862056 | 0.999828922 |
| CARZENIDE                       | 0.995686078 | 0.082375728 | 0.98166385  | 1.525695214 |
| SALSALATE                       | 0.995061585 | 0.050760924 | 0.928213066 | 1.382111057 |
| DOXEPIN HYDROCHLORIDE           | 0.994455407 | 0.133222427 | 0.963708668 | 1.2574466   |
| CRYOFLURANE                     | 0.994156805 | 0.126002488 | 0.965416088 | 1.093288338 |
| ETHENZAMIDE                     | 0.993921847 | 0.182773813 | 0.95835029  | 0.940333624 |
| NICARDIPINE HYDROCHLORIDE       | 0.993850098 | 0.166254479 | 0.964655349 | 1.278250674 |
| CEFMEZAZOLE SODIUM              | 0.993826662 | 0.068417205 | 0.936142296 | 1.192311883 |
| MINOCYCLINE HYDROCHLORIDE       | 0.993800275 | 0.230680479 | 0.964556239 | 1.0396419   |
| PRIMIDONE                       | 0.99366668  | 0.119181636 | 0.95933487  | 1.473088291 |
| DIETHYLCARBAMAZINE CITRATE      | 0.992964836 | 0.133152186 | 0.953960847 | 1.363590795 |
| METHOTREXATE(+/-)               | 0.992633372 | 0.445386743 | 0.963165151 | 0.969672831 |
| CLOTRIMAZOLE                    | 0.992158921 | 0.157651642 | 0.94980605  | 1.436665436 |
| ANIRACETAM                      | 0.992127892 | 0.174078209 | 0.916200671 | 1.142360506 |
| NIMUSTINE                       | 0.99209268  | 0.08175185  | 0.940038112 | 1.041685551 |
| TIBOLONE                        | 0.991781929 | 0.12107322  | 0.928034988 | 1.262369615 |
| MIDODRINE HYDROCHLORIDE         | 0.991229977 | 0.032001513 | 0.932984968 | 1.252108098 |
| GADOTERIDOL                     | 0.991119529 | 0.207845361 | 0.947987115 | 1.06879148  |
| MAPROTILINE HYDROCHLORIDE       | 0.990943882 | 0.047316429 | 0.944446035 | 1.270484813 |
| BRONOPOL                        | 0.990756319 | 0.229651624 | 0.954142343 | 1.293749906 |
| ADENOSINE                       | 0.990229363 | 0.080191632 | 0.911046063 | 1.234096598 |
| METHYLPHENIDATE HYDROCHLORIDE   | 0.990195936 | 0.190242324 | 0.934346242 | 1.812944436 |
| IOHEXOL                         | 0.989942295 | 0.097586574 | 0.89452889  | 1.261869086 |
| FURALTADONE                     | 0.989589187 | 0.187473353 | 0.957344299 | 1.299485294 |
| METOPROLOL TARTRATE             | 0.989196189 | 0.105807405 | 0.935330173 | 0.948415257 |
| NIALAMIDE                       | 0.989039622 | 0.088477771 | 0.917367336 | 0.98439262  |
| AFALANINE                       | 0.988958727 | 0.045808277 | 0.940319278 | 1.074230746 |
| BETAMETHASONE                   | 0.988923039 | 0.119619515 | 0.903724041 | 1.390620527 |
| INAMRINONE                      | 0.988279078 | 0.084815763 | 0.881448236 | 1.286482548 |
| MITOMYCIN                       | 0.988096045 | 0.078176483 | 0.891539477 | 1.085344484 |
| TUBOCURARINE CHLORIDE           | 0.987520764 | 0.014539594 | 0.866676315 | 1.239062814 |
| OLMESARTAN MEDOXOMIL            | 0.987342187 | 0.252304559 | 0.929463772 | 1.129149507 |
| HOMIDIUM BROMIDE                | 0.986753237 | 0.057225842 | 0.943480179 | 1.103341672 |
| MOROXYDINE HYDROCHLORIDE        | 0.985325698 | 0.151745417 | 0.923032291 | 1.057232841 |
| CYCLOSERINE (D)                 | 0.984762012 | 0.169501851 | 0.903772379 | 1.490834262 |
| EPHEDRINE (1R,2S) HYDROCHLORIDE | 0.984404111 | 0.200559744 | 0.913150576 | 1.113544944 |
| PREDNISONE                      | 0.98413275  | 0.163560201 | 0.902020326 | 1.953309647 |
| EFAROXAN HYDROCHLORIDE          | 0.98373426  | 0.015054498 | 0.930349295 | 1.722858504 |
| TRIMEPRAZINE TARTRATE           | 0.983733221 | 0.350987536 | 0.914137347 | 1.338076753 |
| FURAZOLIDONE                    | 0.983657243 | 0.470211793 | 0.923773862 | 1.715416665 |
| DICLOXACILLIN SODIUM            | 0.983564486 | 0.124045373 | 0.891956733 | 1.236646159 |
| TOBRAMYCIN                      | 0.982803155 | 0.042839406 | 0.885597125 | 1.192351849 |
| ZALCITABINE                     | 0.982001653 | 0.154967084 | 0.920577432 | 1.560877142 |
| BROMOPRIDE                      | 0.981703829 | 0.167693326 | 0.90509999  | 1.020047163 |
| KHELLIN                         | 0.981376676 | 0.09204948  | 0.860512862 | 1.189218644 |
| HEXACHLOROPHENE                 | 0.981357628 | 0.540889598 | 0.921573838 | 1.793681027 |
| CINTRIAMIDE                     | 0.98095021  | 0.078398898 | 0.92279094  | 1.009161766 |
| MECLIZINE HYDROCHLORIDE         | 0.980445288 | 0.051194873 | 0.880577708 | 1.107625288 |
| TELITHROMYCIN                   | 0.980116743 | 0.205540512 | 0.883647926 | 1.070078547 |
| CLIDINIUM BROMIDE               | 0.979886833 | 0.218464628 | 0.879733348 | 1.079385572 |
| AMINOGLUTETHIMIDE               | 0.979835165 | 0.074649003 | 0.816896098 | 1.270316009 |
| PASINIAZID                      | 0.979398244 | 0.261549583 | 0.918969685 | 1.505526565 |
| RIBOFLAVIN 5-PHOSPHATE SODIUM   | 0.979376045 | 0.105530429 | 0.916934725 | 1.079826864 |
| PUROMYCIN DIHYDROCHLORIDE       | 0.979170969 | 0.494991409 | 0.9280722   | 1.447105153 |

|                                 |             |             |             |             |
|---------------------------------|-------------|-------------|-------------|-------------|
| VALPROATE SODIUM                | 0.978955463 | 0.10360847  | 0.849276031 | 1.592353674 |
| PROMETHAZINE HYDROCHLORIDE      | 0.978940563 | 0.077587987 | 0.904654483 | 0.897462482 |
| NORGESTREL                      | 0.978185386 | 0.087618863 | 0.842014066 | 2.390899679 |
| OXYMETAZOLINE HYDROCHLORIDE     | 0.977270036 | 0.118793575 | 0.898366631 | 1.20137991  |
| AMPYZINE SULFATE                | 0.977079825 | 0.245409961 | 0.903821767 | 1.493702479 |
| TOPOTECAN HYDROCHLORIDE         | 0.976808709 | 0.187297336 | 0.765927903 | 1.479114928 |
| D-LACTITOL MONOHYDRATE          | 0.976565672 | 0.12029483  | 0.833264823 | 1.071824128 |
| COTININE                        | 0.976083982 | 0.118370818 | 0.842719564 | 1.26125439  |
| ERYTHROMYCIN STEARATE           | 0.975719972 | 0.246261738 | 0.883052466 | 1.247946405 |
| VALACYCLOVIR HYDROCHLORIDE      | 0.975576344 | 0.140900464 | 0.848643215 | 1.087820811 |
| DICHLORISONE ACETATE            | 0.975396895 | 0.226020273 | 0.901357677 | 1.840967857 |
| PHENINDIONE                     | 0.975102372 | 0.304223601 | 0.841928132 | 1.096320587 |
| ANISODAMINE HYDROBROMIDE        | 0.974783957 | 0.107062028 | 0.86693983  | 0.973895308 |
| TIOPRONIN                       | 0.974454329 | 0.138880336 | 0.817527728 | 1.012117168 |
| ASCORBIC ACID                   | 0.973473024 | 0.196875119 | 0.773796142 | 1.396586484 |
| ASPARTIC ACID (L)               | 0.973160764 | 0.220025885 | 0.788999804 | 1.018070151 |
| SOTALOL HYDROCHLORIDE           | 0.97229129  | 0.153126477 | 0.890180258 | 1.056398243 |
| AMLEXANOX                       | 0.97185024  | 0.453882514 | 0.889214025 | 1.081303985 |
| DIMINAZENE ACETURATE            | 0.971328066 | 0.266841386 | 0.862983179 | 1.241640938 |
| MEQUINOL                        | 0.970994016 | 0.203924294 | 0.765134839 | 1.067713644 |
| GLICLAZIDE                      | 0.970797814 | 0.100294674 | 0.78452802  | 1.099617471 |
| CRESOPIRINE                     | 0.970650614 | 0.121062884 | 0.87708817  | 1.048761801 |
| ISOXICAM                        | 0.970191617 | 0.311024879 | 0.832493344 | 1.350496259 |
| SULFADOXINE                     | 0.970157158 | 0.184555447 | 0.853690863 | 1.781951534 |
| OMEGA-3-ACID ESTERS (EPA shown) | 0.969477508 | 0.155336474 | 0.750439743 | 1.229372178 |
| ALTRETAMINE                     | 0.969360008 | 0.170192813 | 0.725509292 | 1.427716226 |
| NEFOPAM                         | 0.969357705 | 0.117574001 | 0.844163062 | 1.1452656   |
| CYCLIZINE                       | 0.969327333 | 0.044660715 | 0.791221063 | 1.336375886 |
| CLOXYQUIN                       | 0.969227321 | 0.163297249 | 0.806182088 | 1.185768376 |
| TOLMETIN SODIUM                 | 0.968994028 | 0.191963628 | 0.796829617 | 0.897252733 |
| METHACYCLINE HYDROCHLORIDE      | 0.968987806 | 0.322679801 | 0.876931039 | 1.154352777 |
| DEXTROMETHORPHAN HYDROBROMIDE   | 0.968815313 | 0.3146173   | 0.859069875 | 1.179246142 |
| TRIPLENNAMINE CITRATE           | 0.968448664 | 0.062063217 | 0.770025538 | 1.236489661 |
| CHOLECALCIFEROL                 | 0.968217102 | 0.138740574 | 0.781150073 | 1.591106242 |
| DOXAPRAM HYDROCHLORIDE          | 0.968000266 | 0.06725675  | 0.855320256 | 1.484456392 |
| SODIUM TETRADECYL SULFATE       | 0.967951293 | 0.158789965 | 0.867684994 | 1.148189221 |
| SULFACHLORPYRIDAZINE            | 0.967871893 | 0.216818389 | 0.846118467 | 1.476034884 |
| PENICILLIN V POTASSIUM          | 0.967243734 | 0.164784982 | 0.799855055 | 1.327912202 |
| PROXYPHYLLINE                   | 0.967197843 | 0.355540411 | 0.826097718 | 1.021522796 |
| OXYPHENONIUM BROMIDE            | 0.967177357 | 0.151856913 | 0.864158756 | 1.206406558 |
| DIBUTYL PHTHALATE               | 0.966911362 | 0.266266453 | 0.80026399  | 1.018473511 |
| METHENAMINE                     | 0.966704106 | 0.122468143 | 0.689745519 | 1.299535092 |
| CANDICIDIN                      | 0.966668942 | 0.114789497 | 0.86652819  | 1.023664314 |
| DOXYLAMINE SUCCINATE            | 0.96533333  | 0.026292458 | 0.763864839 | 1.230278315 |
| PROPOXUR                        | 0.96527602  | 0.116726449 | 0.748796169 | 1.047926482 |
| QUININE SULFATE                 | 0.963677841 | 0.154097141 | 0.776606045 | 1.548431997 |
| NICOTINE BITARTRATE             | 0.9635062   | 0.165441464 | 0.685565667 | 1.258757448 |
| DOMPERIDONE                     | 0.963309753 | 0.272780626 | 0.802475072 | 1.455469432 |
| RUTIN                           | 0.96330627  | 0.426274191 | 0.841630601 | 1.185873168 |
| DESIPRAMINE HYDROCHLORIDE       | 0.963291177 | 0.069226294 | 0.753871106 | 1.148902819 |
| CYCLANDELATE                    | 0.962890088 | 0.400129605 | 0.846148813 | 1.116537177 |
| BETAMIPRON                      | 0.96283386  | 0.106367188 | 0.729490127 | 1.177071854 |
| NEOMYCIN SULFATE                | 0.962491599 | 0.317372243 | 0.779722332 | 1.54548016  |
| PENTYLENETETRAZOL               | 0.962312773 | 0.035258497 | 0.75255219  | 1.445807508 |
| DOPAMINE HYDROCHLORIDE          | 0.962059556 | 0.445815328 | 0.831607393 | 2.051089034 |
| PHYSOSTIGMINE SALICYLATE        | 0.961949462 | 0.20355187  | 0.776984629 | 1.427223117 |
| ACETAZOLAMIDE                   | 0.961694023 | 0.075502792 | 0.661450609 | 1.258115552 |
| EPROBEMIDE                      | 0.961465967 | 0.252385162 | 0.848384096 | 1.499264682 |
| ISOSORBIDE MONONITRATE          | 0.961451597 | 0.061408123 | 0.616574153 | 1.281287817 |
| BUTYLATED HYDROXYANISOLE        | 0.961182318 | 0.105554964 | 0.753019297 | 1.785756878 |
| DIPYRONE                        | 0.961080458 | 0.237032084 | 0.759093075 | 2.057570193 |
| RESORCINOL MONOACETATE          | 0.960708774 | 0.070067852 | 0.711864747 | 1.810282064 |
| TERFENADINE                     | 0.960461345 | 0.167012981 | 0.733302124 | 1.11152068  |
| ACAMPROSATE CALCIUM             | 0.960215976 | 0.181906493 | 0.73835414  | 1.027449487 |
| ETHAMBUTOL HYDROCHLORIDE        | 0.959909246 | 0.299530129 | 0.758254622 | 1.370242947 |
| CEFOTETAN                       | 0.959442484 | 0.373832334 | 0.774550089 | 1.324029608 |
| PIZOTYLIN MALATE                | 0.959240594 | 0.205583215 | 0.764593644 | 1.454035734 |
| MITOTANE                        | 0.958814704 | 0.228122479 | 0.706865509 | 1.280549566 |
| TACROLIMUS                      | 0.958692698 | 0.194797608 | 0.730780907 | 1.329102171 |
| AMPIROXICAM                     | 0.958480431 | 0.031480823 | 0.686811191 | 1.079293319 |
| BISOCTRIZOLE                    | 0.9582619   | 0.169425084 | 0.818539999 | 1.422291605 |
| PRIMAQUINE PHOSPHATE            | 0.958019398 | 0.15425902  | 0.743160231 | 1.486359252 |

|                                |             |             |             |             |
|--------------------------------|-------------|-------------|-------------|-------------|
| TYROSINE                       | 0.957909031 | 0.144901043 | 0.71269238  | 0.925080888 |
| PHENOTHIAZINE                  | 0.957788326 | 0.289507216 | 0.715590656 | 0.131536355 |
| RAMIPRIL                       | 0.957683009 | 0.016016875 | 0.744012839 | 1.046851108 |
| PROBENECID                     | 0.956762231 | 0.064905863 | 0.720372121 | 1.087062943 |
| BIOTIN                         | 0.956653656 | 0.113763146 | 0.580965052 | 1.216433589 |
| NOREPINEPHRINE                 | 0.95631645  | 0.528905611 | 0.810371566 | 2.06066018  |
| SODIUM PHENYL BUTYRATE         | 0.956206927 | 0.195330807 | 0.830202373 | 1.123040565 |
| DIRITHROMYCIN                  | 0.955844553 | 0.141349851 | 0.825284687 | 1.229783669 |
| LUFENURON                      | 0.955489141 | 0.173446434 | 0.775951942 | 1.348458687 |
| PHENSUCCIMIDE                  | 0.954310209 | 0.131798638 | 0.771226898 | 1.498478766 |
| ASPIRIN                        | 0.953833842 | 0.059142241 | 0.548993687 | 1.12786746  |
| ENILCONAZOLE                   | 0.953799048 | 0.008316456 | 0.389193007 | 1.228736662 |
| THIOSTREPTON                   | 0.952753308 | 0.17855388  | 0.81580016  | 2.51869295  |
| PERGOLIDE MESYLATE             | 0.952298242 | 0.156667724 | 0.677876259 | 2.410418005 |
| PHENYLEPHRINE HYDROCHLORIDE    | 0.95148963  | 0.320972687 | 0.753422244 | 2.027753671 |
| AMPROLIUM                      | 0.951203107 | 0.183626137 | 0.630934304 | 1.451355147 |
| GLUCONOLACTONE                 | 0.951173124 | 0.082926651 | 0.411044619 | 1.376330173 |
| VORICONAZOLE                   | 0.950868495 | 0.10120728  | 0.781600304 | 1.503585496 |
| CEFONICID SODIUM               | 0.95073313  | 0.162612214 | 0.672778839 | 1.18624259  |
| ACENOCOUMAROL                  | 0.950718355 | 0.133348173 | 0.783307742 | 1.04376931  |
| GLUCOSAMINE HYDROCHLORIDE      | 0.950557468 | 0.423736232 | 0.756410782 | 1.60904365  |
| OXAPROZIN                      | 0.949833605 | 0.106466016 | 0.68870356  | 1.111577831 |
| GABOXADOL HYDROCHLORIDE        | 0.949641722 | 0.05796057  | 0.629055836 | 1.03243519  |
| SULPIRIDE                      | 0.949596654 | 0.307570851 | 0.777890205 | 1.288236045 |
| AMINOPENTAMIDE SULFATE         | 0.949594834 | 0.125838998 | 0.65368951  | 1.077054897 |
| ETHYNODIOL DIACETATE           | 0.949459084 | 0.116638783 | 0.688508933 | 1.152141391 |
| CEFALONIUM                     | 0.94939891  | 0.039160693 | 0.786417187 | 1.427289306 |
| BROMPHENIRAMINE MALEATE        | 0.948517897 | 0.039717939 | 0.624503461 | 1.52770508  |
| MIANSERIN HYDROCHLORIDE        | 0.948488425 | 0.182108878 | 0.505990799 | 1.242514215 |
| BRINZOLAMIDE                   | 0.948476783 | 0.096388323 | 0.79429137  | 1.067630726 |
| CARISOPRODOL                   | 0.948339521 | 0.04196671  | 0.546668485 | 1.316053207 |
| PROPARACAINE HYDROCHLORIDE     | 0.94759958  | 0.170020021 | 0.595631559 | 1.168135415 |
| FENCLOLINE                     | 0.947488033 | 0.132820131 | 0.731045662 | 1.100858182 |
| OXYQUINOLINE SULFATE           | 0.947104721 | 0.064075755 | 0.577767492 | 1.049303688 |
| MOXIDECTIN                     | 0.947066788 | 0.414412303 | 0.789071078 | 1.258844275 |
| QUIPAZINE MALEATE              | 0.946890235 | 0.055424811 | 0.615949525 | 1.84466085  |
| PAROMOMYCIN SULFATE            | 0.946662713 | 0.429634896 | 0.720695715 | 1.422708766 |
| FLUVASTATIN                    | 0.946581824 | 0.30020325  | 0.725011836 | 1.513009921 |
| FOSFOSAL                       | 0.946486886 | 0.261497869 | 0.749485335 | 1.104090879 |
| SALICIN                        | 0.946302758 | 0.071717316 | 0.468613998 | 1.363263757 |
| OCTISALATE                     | 0.94624456  | 0.233150384 | 0.796081443 | 1.257035147 |
| NALOXONE HYDROCHLORIDE         | 0.945997624 | 0.151148573 | 0.636583862 | 1.873101586 |
| INOSITOL                       | 0.945855537 | 0.248095212 | 0.651893516 | 1.380682048 |
| AJMALINE                       | 0.945675059 | 0.326226276 | 0.760070344 | 0.945890534 |
| HEXAMETHONIUM BROMIDE          | 0.945298471 | 0.099557923 | 0.712202316 | 1.121688375 |
| ROXARSONE                      | 0.945113529 | 0.171791353 | 0.549530842 | 1.103480848 |
| TEICOPLANIN [A(2-1) shown]     | 0.944922446 | 0.025830602 | 0.671771894 | 1.168244673 |
| MEMANTINE HYDROCHLORIDE        | 0.944814832 | 0.130745466 | 0.684392705 | 1.151111549 |
| HYDROCORTISONE                 | 0.944738859 | 0.118302016 | 0.395362693 | 1.317223534 |
| ISAXONINE                      | 0.94450147  | 0.103890656 | 0.769169681 | 1.103350188 |
| TIMONACIC                      | 0.944118194 | 0.079420112 | 0.766294494 | 1.320735083 |
| CLOMIPHENE CITRATE             | 0.944067412 | 0.035126163 | 0.629822585 | 1.586360606 |
| AMANTADINE HYDROCHLORIDE       | 0.943765457 | 0.032403367 | 0.51055581  | 1.274635501 |
| BLEOMYCIN (bleomycin B2 shown) | 0.943540744 | 0.228491598 | 0.522797286 | 1.302121854 |
| CYROMAZINE                     | 0.943468186 | 0.097217008 | 0.702813658 | 1.227827146 |
| BECLOMETHASONE DIPROPIONATE    | 0.943459766 | 0.019032884 | 0.506435689 | 1.467809797 |
| DEXIBUPROFEN                   | 0.943319353 | 0.073119019 | 0.599913989 | 1.239320815 |
| MEPIROXOL                      | 0.942797463 | 0.131329073 | 0.764244218 | 1.09954649  |
| APOMORPHINE HYDROCHLORIDE      | 0.942170957 | 0.310647192 | 0.649915877 | 1.77633485  |
| alpha-TOCHOPHEROL              | 0.941969438 | 0.140045675 | 0.541854628 | 1.277190321 |
| MANNITOL                       | 0.941891075 | 0.161250601 | 0.748800578 | 1.279053786 |
| METAXALONE                     | 0.941700568 | 0.047092212 | 0.298425087 | 1.1632457   |
| CLOZAPINE                      | 0.941459005 | 0.309268722 | 0.787481134 | 1.110688887 |
| ALENDRONATE SODIUM             | 0.940269747 | 0.170366082 | 0.650572694 | 1.395407307 |
| ESTROPIPATE                    | 0.939922788 | 0.126925211 | 0.63674854  | 1.190107291 |
| TEGASEROD MALEATE              | 0.939886213 | 0.189904509 | 0.743985576 | 1.631155926 |
| ALOIN                          | 0.93984935  | 0.147824027 | 0.696468263 | 1.08390756  |
| FLUROFAMIDE                    | 0.939737309 | 0.39613295  | 0.68286948  | 1.153203208 |
| ROPINIROLE HYDROCHLORIDE       | 0.939687554 | 0.119435848 | 0.633630745 | 1.339427917 |
| LOVASTATIN                     | 0.938853886 | 0.095257819 | 0.32135548  | 1.45999508  |
| LEVOCETIRIZINE DIHYDROCHLORIDE | 0.938750954 | 0.241468279 | 0.584540739 | 1.029644952 |
| PITAVASTATIN CALCIUM           | 0.938616385 | 0.229580902 | 0.575656476 | 1.145006624 |



|                                   |             |             |             |             |
|-----------------------------------|-------------|-------------|-------------|-------------|
| ACTARIT                           | 0.937997242 | 0.029176407 | 0.739883688 | 1.169311871 |
| CHLOROGUANIDE HYDROCHLORIDE       | 0.937761135 | 0.107554573 | 0.327595195 | 1.274874861 |
| METOLAZONE                        | 0.937690463 | 0.131849489 | 0.611105866 | 1.088878707 |
| ISRADIPINE                        | 0.93764052  | 0.229822307 | 0.656244018 | 1.218296552 |
| SERATRODAST                       | 0.937001994 | 0.12667574  | 0.724834988 | 1.384717148 |
| GANCICLOVIR                       | 0.936967095 | 0.294775281 | 0.748497515 | 1.41932291  |
| BACAMPICILLIN HYDROCHLORIDE       | 0.936822469 | 0.113995823 | 0.425321373 | 1.446842816 |
| LOBENDAZOLE                       | 0.936693066 | 0.229211366 | 0.618135245 | 1.097951614 |
| TROPICAMIDE                       | 0.936364182 | 0.081901829 | 0.562483682 | 1.6637447   |
| ACESULFAME POTASSIUM              | 0.936293862 | 0.11740534  | 0.328946482 | 1.221639463 |
| SODIUM GLUCONATE                  | 0.935752396 | 0.070165666 | 0.597088716 | 1.093567248 |
| LEVALBUTEROL HYDROCHLORIDE        | 0.935175988 | 0.04098053  | 0.246832994 | 1.035828206 |
| SULFANITRAN                       | 0.93503307  | 0.148915835 | 0.637126347 | 0.981035642 |
| ESTRADIOL VALERATE                | 0.934903754 | 0.240451893 | 0.583855044 | 1.219142021 |
| LABETALOL HYDROCHLORIDE           | 0.934739119 | 0.198196196 | 0.589998482 | 1.61679539  |
| GRANISETRON HYDROCHLORIDE         | 0.934497039 | 0.093234341 | 0.711462354 | 1.146554289 |
| PYRETHRINS                        | 0.933518267 | 0.237925095 | 0.750077471 | 1.199445118 |
| TRIPROLDINE HYDROCHLORIDE         | 0.932981601 | 0.114462011 | 0.551941663 | 1.726329257 |
| BROMOCRIPTINE MESYLATE            | 0.932855543 | 0.077399522 | 0.448119775 | 1.728796294 |
| DOXYCYCLINE HYDROCHLORIDE         | 0.932156658 | 0.020842423 | 0.558827625 | 1.165202112 |
| MESNA                             | 0.932066838 | 0.021439295 | 0.343351275 | 1.108273803 |
| THIAMYLAL SODIUM                  | 0.932045236 | 0.16249564  | 0.625482231 | 1.106627209 |
| PHYTONADIONE                      | 0.932002665 | 0.040241927 | 0.430272848 | 1.166632256 |
| PROGLUMIDE                        | 0.931861808 | 0.141574255 | 0.473068079 | 1.149236671 |
| PINACIDIL                         | 0.931800528 | 0.168161021 | 0.45626432  | 1.322947522 |
| METHIMAZOLE                       | 0.931758011 | 0.08468279  | 0.440184065 | 1.167404679 |
| TINIDAZOLE                        | 0.931167823 | 0.141593335 | 0.409921703 | 1.240695665 |
| GABAPENTIN                        | 0.93116193  | 0.111213402 | 0.72888086  | 1.15427526  |
| PROPOFOL                          | 0.931038839 | 0.037233842 | 0.217954486 | 1.148757233 |
| NEVIRAPINE                        | 0.931005373 | 0.201902934 | 0.571053659 | 1.763489473 |
| DESONIDE                          | 0.930992505 | 0.165517967 | 0.732773923 | 1.865993543 |
| LACTULOSE                         | 0.930139848 | 0.331707891 | 0.61261137  | 1.514248794 |
| GRISEOFULVIN                      | 0.928603348 | 0.098998726 | 0.382196589 | 1.693456298 |
| AMPICILLIN SODIUM                 | 0.928088647 | 0.158907503 | 0.464590372 | 1.364037888 |
| PREDNICARBATE                     | 0.92787468  | 0.247733663 | 0.614400468 | 1.534616616 |
| METFORMIN HYDROCHLORIDE           | 0.92772676  | 0.098794839 | 0.24958659  | 1.056310851 |
| SYMCLOSENE                        | 0.927486401 | 0.121768961 | 0.369008319 | 1.292215089 |
| PEMETREXED                        | 0.92744025  | 0.106621739 | 0.588747164 | 1.059047247 |
| LACTOSE MONOHYDRATE               | 0.927137267 | 0.240876627 | 0.658893792 | 1.140175441 |
| MENADIONE                         | 0.927132068 | 0.214203308 | 0.452819465 | 1.492230329 |
| FENOPROFEN                        | 0.926850059 | 0.021470087 | 0.389444449 | 1.132509937 |
| DIBEKACIN                         | 0.926659981 | 0.231635529 | 0.713464365 | 1.307393795 |
| CHLORTHALIDONE                    | 0.926445767 | 0.104432877 | 0.541151188 | 1.276019855 |
| ARGININE HYDROCHLORIDE            | 0.926233825 | 0.113943631 | 0.679218758 | 1.348122852 |
| FIPRONIL                          | 0.925655048 | 0.144884204 | 0.398186749 | 1.456545367 |
| CARTEOLOL HYDROCHLORIDE           | 0.924721552 | 0.236617884 | 0.49955414  | 1.319419749 |
| FLUOROMETHOLONE                   | 0.924409882 | 0.363887968 | 0.603395868 | 1.457172831 |
| DYDROGESTERONE                    | 0.924340426 | 0.207314314 | 0.713144954 | 1.554844861 |
| TRISODIUM ETHYLENEDIAMINE TETRACE | 0.923956454 | 0.109909756 | 0.529373071 | 1.145232633 |
| DYCLONINE HYDROCHLORIDE           | 0.923317486 | 0.201312056 | 0.46737677  | 1.410543729 |
| TELENZEPINE HYDROCHLORIDE         | 0.923104072 | 0.143243551 | 0.688616344 | 1.254331711 |
| NAFRONYL OXALATE                  | 0.92285744  | 0.282290974 | 0.502766904 | 1.179557691 |
| CLENBUTEROL HYDROCHLORIDE         | 0.92272269  | 0.118876064 | 0.684736728 | 1.664696843 |
| CEFUROXIME AXETIL                 | 0.922408889 | 0.352952659 | 0.633257916 | 1.171748106 |
| PIRENZEPINE HYDROCHLORIDE         | 0.922284797 | 0.042089831 | 0.552945481 | 1.085059408 |
| METHYLERGONOVINE MALEATE          | 0.922236993 | 0.602668699 | 0.706851718 | 1.985402161 |
| ETHANOLAMINE OLEATE               | 0.921941004 | 0.197384703 | 0.422030209 | 1.067300237 |
| MILNACIPRAN HYDROCHLORIDE         | 0.921728933 | 0.359480713 | 0.704908521 | 1.747928963 |
| IDEBENONE                         | 0.921550323 | 0.123009299 | 0.680644708 | 1.482441103 |
| AMISULPRIDE                       | 0.921549217 | 0.12725607  | 0.602885056 | 1.172213502 |
| SORBITOL                          | 0.921314308 | 0.070773206 | 0.598541951 | 1.050612966 |
| BACLOFEN                          | 0.920965405 | 0.145046724 | 0.413232558 | 1.226276371 |
| CITICOLINE                        | 0.92080783  | 0.197197611 | 0.559872429 | 1.172906269 |
| THALIDOMIDE                       | 0.920633188 | 0.164350561 | 0.496571014 | 1.816973037 |
| ATROPINE OXIDE                    | 0.919760879 | 0.165416213 | 0.486770363 | 0.945313726 |
| APRAMYCIN SULFATE                 | 0.919080777 | 0.153908782 | 0.535366827 | 1.343357292 |
| THEOPHYLLINE                      | 0.91861002  | 0.089397016 | 0.189268919 | 1.417067449 |
| DIENESTROL                        | 0.918278569 | 0.114128314 | 0.501047997 | 1.687672688 |
| IMPENEM                           | 0.918252926 | 0.182352255 | 0.65647296  | 1.457907296 |
| PRASUGREL                         | 0.917023156 | 0.067672061 | 0.638036238 | 1.256997367 |
| HISTAMINE DIHYDROCHLORIDE         | 0.916731704 | 0.74747196  | 0.736148362 | 2.134637693 |
| ERYTHRITOL                        | 0.916120027 | 0.188742628 | 0.597516294 | 1.281716541 |

|                                  |             |             |             |             |
|----------------------------------|-------------|-------------|-------------|-------------|
| ACARBOSE                         | 0.915815887 | 0.205426642 | 0.539241411 | 1.539593586 |
| SAXAGLIPTIN                      | 0.915442821 | 0.041121274 | 0.275807826 | 1.137744596 |
| CLOFIBRATE                       | 0.915144651 | 0.144870799 | 0.458631396 | 1.662148278 |
| ADAPALENE                        | 0.915120866 | 0.045195513 | 0.517991134 | 0.99061375  |
| SULFISOXAZOLE                    | 0.914913646 | 0.096879798 | 0.492235715 | 1.192396279 |
| RIBOSTAMYCIN SULFATE             | 0.914544661 | 0.154018715 | 0.657685026 | 1.765172455 |
| DIMETRIDAZOLE                    | 0.914164615 | 0.123747268 | 0.574379168 | 1.051232969 |
| SPAGLUMIC ACID                   | 0.91401589  | 0.201425191 | 0.591863791 | 1.101511434 |
| PENCICLOVIR                      | 0.913926877 | 0.212067533 | 0.604032162 | 1.469314469 |
| RASAGILINE                       | 0.913228274 | 0.085778484 | 0.624373172 | 1.377924617 |
| OSELTAMIVIR PHOSPHATE            | 0.912738548 | 0.07113442  | 0.621247713 | 1.414048438 |
| CYPROTERONE                      | 0.912401315 | 0.099493077 | 0.643937247 | 1.901847917 |
| ENALAPRIL MALEATE                | 0.912398343 | 0.273536898 | 0.65192643  | 1.452514148 |
| OLEANDOMYCIN PHOSPHATE           | 0.912000456 | 0.120820115 | 0.190456924 | 1.209557057 |
| AMITRAZ                          | 0.91180833  | 0.210963962 | 0.379149891 | 1.351263708 |
| GUAIACOL                         | 0.911627323 | 0.061552405 | 0.55403713  | 1.000018856 |
| CHLORPHENIRAMINE MALEATE         | 0.910837502 | 0.148580319 | 0.476193894 | 1.185051726 |
| CEFAZOLIN SODIUM                 | 0.910778356 | 0.107759783 | 0.508071925 | 1.127606464 |
| PREDNISOLONE                     | 0.91069093  | 0.114523833 | 0.476503756 | 1.851336241 |
| CEFOPERAZONE                     | 0.910675084 | 0.096443861 | 0.277780944 | 1.220909821 |
| DIPYROCETYL                      | 0.910673451 | 0.284740235 | 0.665119    | 1.297837943 |
| DEBRISOQUIN SULFATE              | 0.91004094  | 0.088050897 | 0.500370574 | 1.060768839 |
| HYDROCORTISONE ACETATE           | 0.909780589 | 0.347379386 | 0.525546094 | 1.57526814  |
| GUANABENZ ACETATE                | 0.909737192 | 0.422908506 | 0.572917861 | 1.515813436 |
| PHENFORMIN HYDROCHLORIDE         | 0.909678892 | 0.244440232 | 0.635598103 | 1.678931015 |
| LIDOCAINE HYDROCHLORIDE          | 0.909447991 | 0.118005437 | 0.426369956 | 1.578780154 |
| FAMOTIDINE                       | 0.909382553 | 0.204606645 | 0.467732293 | 1.333572152 |
| DIACETAMATE                      | 0.909093573 | 0.240518974 | 0.651194483 | 1.158037922 |
| CETIRIZINE HYDROCHLORIDE         | 0.908638804 | 0.14256219  | 0.613160973 | 1.146627126 |
| FIPEXIDE HYDROCHLORIDE           | 0.90832555  | 0.177043125 | 0.637984522 | 1.287593225 |
| MANGAFODIPIR TRISODIUM           | 0.907231462 | 0.180653476 | 0.327813494 | 1.143001608 |
| ARTEMISININ                      | 0.907118696 | 0.215603957 | 0.567099203 | 1.314797693 |
| URAPIDIL HYDROCHLORIDE           | 0.906697621 | 0.250964324 | 0.571876119 | 1.325860465 |
| LITHIUM CITRATE                  | 0.90667586  | 0.197279737 | 0.493534486 | 1.085042783 |
| EBSELEN                          | 0.906643054 | 0.186093662 | 0.633271522 | 1.329287599 |
| BACITRACIN                       | 0.906467208 | 0.067498045 | 0.293123297 | 1.335616673 |
| PYRITHYLDIONE                    | 0.906451949 | 0.215858234 | 0.564442735 | 1.080745897 |
| CALCIUM GLUCEPTATE               | 0.905736587 | 0.086793753 | 0.480341017 | 1.091899111 |
| NITROFURAZONE                    | 0.905401865 | 0.288534179 | 0.464713825 | 1.37178641  |
| INOSINE                          | 0.905399647 | 0.240855469 | 0.563284453 | 1.126719223 |
| LORNOXICAM                       | 0.905288633 | 0.04991156  | 0.630370752 | 1.088299121 |
| BARBITAL                         | 0.905123941 | 0.134882316 | 0.532220815 | 1.188571498 |
| EDARAVONE                        | 0.904621593 | 0.166824858 | 0.411558494 | 0.950615591 |
| DASATINIB                        | 0.904464074 | 0.478441825 | 0.651805659 | 1.179929143 |
| CEFTIBUTEN                       | 0.904291946 | 0.063475942 | 0.439669694 | 1.305185611 |
| CARBOPLATIN                      | 0.90425889  | 0.18403311  | 0.316383644 | 1.147839153 |
| PYRIDOSTIGMINE BROMIDE           | 0.903995367 | 0.168211017 | 0.210312531 | 1.340545168 |
| RONIDAZOLE                       | 0.903763191 | 0.05680415  | 0.466371343 | 1.578506595 |
| CHLORINDANOL                     | 0.903569796 | 0.062924034 | 0.225851361 | 1.274182995 |
| CHLORTETRACYCLINE HYDROCHLORIDE  | 0.903282827 | 0.108914512 | 0.426293647 | 1.373659622 |
| RUFLOXACIN HYDROCHLORIDE         | 0.903244809 | 0.213111029 | 0.54563464  | 1.316615293 |
| PIDOLIC ACID                     | 0.903112635 | 0.066958176 | 0.517877374 | 1.043563607 |
| EDOXYDINE                        | 0.903051378 | 0.234473485 | 0.343608521 | 1.202050871 |
| HYCANTHONE                       | 0.902527942 | 0.119341811 | 0.385139117 | 1.025751152 |
| EUCATROPINE HYDROCHLORIDE        | 0.901725682 | 0.320421369 | 0.471082525 | 1.399945149 |
| CLOPERASTINE HYDROCHLORIDE       | 0.90140846  | 0.03902362  | 0.599461239 | 1.87885266  |
| ETHYLNOREPINEPHRINE HYDROCHLORIC | 0.901192826 | 0.07850022  | 0.511270152 | 1.924378783 |
| ATROPINE SULFATE                 | 0.901161305 | 0.057409178 | 0.264570342 | 1.08703143  |
| ENALAPRILAT                      | 0.901126535 | 0.103860907 | 0.619091889 | 1.417607222 |
| ISOVALERAMIDE                    | 0.901047625 | 0.064304771 | 0.191579121 | 1.180589564 |
| BUCLADESINE                      | 0.901028513 | 0.306472086 | 0.480772035 | 1.443151483 |
| DEXPANTHENOL                     | 0.900100496 | 0.13858388  | 0.297913206 | 1.162777606 |
| CINOCTRAMIDE                     | 0.899299409 | 0.190235935 | 0.527911595 | 1.297948298 |
| BETAMETHASONE SODIUM PHOSPHATE   | 0.898479772 | 0.090247969 | 0.110061917 | 1.384962206 |
| LEVYCLOSERINE                    | 0.898284912 | 0.181535582 | 0.475181006 | 0.99669618  |
| CEFTAZIDIME                      | 0.898183734 | 0.129102504 | 0.611297738 | 1.190782907 |
| FENSPIRIDE HYDROCHLORIDE         | 0.897643278 | 0.071426512 | 0.24996204  | 1.21787958  |
| DIOXYBENZONE                     | 0.897590259 | 0.230514396 | 0.453868488 | 0.835427449 |
| PIPERONYL BUTOXIDE               | 0.89733503  | 0.239605931 | 0.535531424 | 1.129842682 |
| VIOMYCIN SULFATE                 | 0.897170335 | 0.013577622 | 0.162076384 | 1.235776416 |
| OLANZAPINE                       | 0.897148423 | 0.270864433 | 0.389831069 | 1.228536085 |
| NAFTIFINE HYDROCHLORIDE          | 0.89689896  | 0.310616673 | 0.421744403 | 1.081866983 |

|                                  |             |             |             |             |
|----------------------------------|-------------|-------------|-------------|-------------|
| NICERGOLINE                      | 0.896802914 | 0.109993683 | 0.201567414 | 1.167091791 |
| DEXFOSFOSERINE                   | 0.896326517 | 0.338246429 | 0.566985924 | 1.124306279 |
| DISULFIRAM                       | 0.893992497 | 0.088405321 | 0.483195574 | 1.071644761 |
| FLUORESCEIN                      | 0.893659791 | 0.107245886 | 0.250299722 | 1.251163075 |
| DECOQUINATE                      | 0.89355649  | 0.168557874 | 0.424050502 | 1.097783031 |
| ETHAMIVAN                        | 0.893554212 | 0.025906268 | 0.319212779 | 1.436610125 |
| PREGABALIN                       | 0.893438935 | 0.149813569 | 0.148131824 | 1.171937688 |
| ROXATIDINE ACETATE HYDROCHLORIDE | 0.893059124 | 0.037694582 | 0.543915125 | 1.309006215 |
| RACTOPAMINE HYDROCHLORIDE        | 0.892805516 | 0.176841871 | 0.560093071 | 1.807152056 |
| FENBENDAZOLE                     | 0.892683433 | 0.194484629 | 0.306847349 | 2.930515002 |
| SULFAPHENAZOLE                   | 0.892429885 | 0.127773544 | 0.336771938 | 1.075593763 |
| FLOPROPIONE                      | 0.892210216 | 0.03268173  | 0.30662013  | 1.159884011 |
| VINCAMINE                        | 0.891970089 | 0.284926976 | 0.531004789 | 1.067690809 |
| PAROXYPROPIONE                   | 0.891812973 | 0.232508444 | 0.511860565 | 0.959564559 |
| CHLORPROPAMIDE                   | 0.891722389 | 0.249252171 | 0.439267381 | 1.212616275 |
| NORETHINDRONE ACETATE            | 0.891528146 | 0.514282411 | 0.555322348 | 1.575341164 |
| TIAPRIDE HYDROCHLORIDE           | 0.891394149 | 0.027359185 | 0.14385659  | 1.186417543 |
| HEXYLENE GLYCOL                  | 0.890690131 | 0.140182356 | 0.429323272 | 1.102081458 |
| PIPERAZINE                       | 0.890419063 | 0.066547411 | 0.174640918 | 1.327401059 |
| TUAMINOHEPTANE SULFATE           | 0.889409276 | 0.074926403 | 0.320391921 | 1.570267065 |
| BITOSCANATE                      | 0.88929602  | 0.150547178 | 0.5667621   | 1.625160694 |
| ALPRENOLOL                       | 0.88844663  | 0.073400338 | 0.149425799 | 1.337023683 |
| PYRITHIONE ZINC                  | 0.888314048 | 0.261754004 | 0.318554557 | 0.091564018 |
| ETODOLAC                         | 0.888233909 | 0.144972839 | 0.34210326  | 1.419336289 |
| SODIUM MONOFLUOROPHOSPHATE       | 0.887459309 | 0.251100058 | 0.512354623 | 1.359845536 |
| IRBESARTAN                       | 0.886181431 | 0.061578112 | 0.360765166 | 1.236930369 |
| METHYLATROPINE NITRATE           | 0.88543169  | 0.011590945 | 0.144635511 | 1.278555489 |
| ACETOHEXAMIDE                    | 0.885396207 | 0.209360481 | 0.361615701 | 1.079058796 |
| PREDNISOLONE HEMISUCCINATE       | 0.885284539 | 0.255417291 | 0.389663427 | 1.465432665 |
| DEFLAZACORT                      | 0.885064817 | 0.217077915 | 0.395173822 | 1.560511307 |
| PHTHALYLSULFACETAMIDE            | 0.884961709 | 0.040165324 | 0.541104612 | 1.419310423 |
| DEQUALINIUM CHLORIDE             | 0.884796251 | 0.146822028 | 0.550828477 | 1.18661876  |
| LORATADINE                       | 0.884576841 | 0.186688847 | 0.341379548 | 1.500045064 |
| MALATHION                        | 0.883910199 | 0.055722386 | 0.148763627 | 1.435249402 |
| CARSALAM                         | 0.882143381 | 0.090084665 | 0.534912207 | 1.431106469 |
| FELODIPINE                       | 0.881707764 | 0.084235881 | 0.327074174 | 2.325322493 |
| IDRAMANTONE                      | 0.881492105 | 0.022880274 | 0.262521172 | 1.066673055 |
| BENFLUOREX HYDROCHLORIDE         | 0.880540682 | 0.051006926 | 0.526518265 | 1.118239815 |
| DIOSMIN                          | 0.880110072 | 0.05436995  | 0.424786127 | 1.096390947 |
| NELARABIN                        | 0.879823657 | 0.086510131 | 0.441714758 | 1.608777032 |
| CIMETIDINE                       | 0.87976237  | 0.085584327 | 0.147977987 | 1.28141846  |
| CANRENOIC ACID, POTASSIUM SALT   | 0.879703476 | 0.102371124 | 0.290551341 | 1.424726279 |
| VALSARTAN                        | 0.879193889 | 0.08007392  | 0.058404675 | 1.199740128 |
| AMYLENE HYDRATE                  | 0.878871941 | 0.092674458 | 0.425521213 | 1.22498695  |
| EDROPHONIUM CHLORIDE             | 0.878440016 | 0.237810139 | 0.475384976 | 1.473257402 |
| IOPANIC ACID                     | 0.878208445 | 0.208485533 | 0.32948409  | 1.509134503 |
| PERINDOPRIL ERBUMINE             | 0.877592864 | 0.145590514 | 0.351205072 | 1.286420576 |
| gamma-AMINOBUTYRIC ACID          | 0.87758982  | 0.08600982  | 0.261344407 | 1.038121931 |
| AMLODIPINE BESYLATE              | 0.877038241 | 0.066205192 | 0.326037538 | 1.270915255 |
| NOVOBIOCIN SODIUM                | 0.876276862 | 0.047577528 | 0.163601241 | 1.115073376 |
| RILUZOLE                         | 0.874848326 | 0.098454076 | 0.18064259  | 1.287714767 |
| BERGAPTEN                        | 0.874800639 | 0.127250875 | 0.267230548 | 1.099043511 |
| NADIDE                           | 0.874437011 | 0.044288436 | 0.24697328  | 1.894976928 |
| ZOLPIDEM                         | 0.873871776 | 0.263738108 | 0.468556536 | 1.382341458 |
| AMINOPTERIN                      | 0.873462448 | 0.123931276 | 0.261001807 | 1.110275007 |
| DEXPROPRANOLOL HYDROCHLORIDE     | 0.873170531 | 0.32963603  | 0.423219919 | 1.089316836 |
| CEFDITORIN PIVOXIL               | 0.872617375 | 0.235115386 | 0.373519873 | 0.915876875 |
| HYOSCYAMINE                      | 0.872498312 | 0.444974511 | 0.444778085 | 1.516383195 |
| GALANTAMINE                      | 0.872144372 | 0.159377266 | 0.429368959 | 1.632624965 |
| PRAZQUANTEL                      | 0.871837601 | 0.111040459 | 0.31233973  | 1.746941548 |
| TRIMETAZIDINE DIHYDROCHLORIDE    | 0.871194031 | 0.201410347 | 0.515565763 | 1.069296403 |
| PHENIRAMINE MALEATE              | 0.871022215 | 0.149876832 | 0.479577869 | 1.27179995  |
| CINCHONINE                       | 0.869916693 | 0.162368671 | 0.35776425  | 0.949134033 |
| PIDOTIMOD                        | 0.869748632 | 0.110398821 | 0.389568562 | 1.294071999 |
| ETHOPROPAZINE HYDROCHLORIDE      | 0.869299893 | 0.097118344 | 0.196633408 | 0.705754682 |
| PREDNISOLONE ACETATE             | 0.869091746 | 0.147789396 | 0.315610239 | 1.799437767 |
| ROLITETRACYCLINE                 | 0.869089853 | 0.076202021 | 0.240220975 | 0.941238091 |
| NITROXOLINE                      | 0.868628852 | 0.290978617 | 0.528304425 | 0.843772317 |
| CEFAMANDOLE NAFATE               | 0.868619422 | 0.106968435 | 0.054607131 | 1.61404643  |
| CHLOROPYRAMINE HYDROCHLORIDE     | 0.868393465 | 0.106144172 | 0.491173202 | 1.445998024 |
| PRONETALOL HYDROCHLORIDE         | 0.868025616 | 0.105750483 | 0.489945821 | 1.383920275 |
| DIACERIN                         | 0.867789618 | 0.161128684 | 0.395695262 | 0.728203863 |

|                                  |             |             |             |             |
|----------------------------------|-------------|-------------|-------------|-------------|
| GUANETHIDINE MONOSULFATE         | 0.867687428 | 0.296225067 | 0.318547195 | 1.398576774 |
| PHENYLETHYL ALCOHOL              | 0.867643945 | 0.065628007 | 0.456754766 | 1.791938722 |
| METHYLPREDNISOLONE               | 0.867486234 | 0.607159626 | 0.519179739 | 1.452608156 |
| KANAMYCIN A SULFATE              | 0.866971003 | 0.286920878 | 0.308989384 | 1.254682714 |
| BETAZOLE HYDROCHLORIDE           | 0.866342252 | 0.140800313 | 0.462543629 | 1.573811763 |
| TETRAHYDROZOLINE HYDROCHLORIDE   | 0.866200265 | 0.139946707 | 0.302575125 | 1.453847928 |
| FLUDROCORTISONE ACETATE          | 0.865996431 | 0.105459626 | 0.18984936  | 1.196933581 |
| TRYPTOPHAN                       | 0.86577844  | 0.223802467 | 0.30095329  | 1.543956539 |
| IMEXON                           | 0.865648652 | 0.085288212 | 0.22712031  | 1.559364913 |
| GUAIFENESIN                      | 0.86534254  | 0.294106406 | 0.30886803  | 1.354455473 |
| RITANSERIN                       | 0.865299916 | 0.240286307 | 0.431239619 | 1.201214517 |
| ORLISTAT                         | 0.864241545 | 0.12532052  | 0.296352328 | 1.117122712 |
| CLOMIPRAMINE HYDROCHLORIDE       | 0.863426688 | 0.133808802 | 0.393257747 | 1.212288513 |
| SELENOMETHIONINE                 | 0.863181573 | 0.198191464 | 0.397779813 | 0.998119668 |
| FOSFOMYCIN CALCIUM               | 0.862986478 | 0.117957474 | 0.103763124 | 1.285370006 |
| FLUNIXIN MEGLUMINE               | 0.862871513 | 0.449465549 | 0.507474374 | 0.374798285 |
| DABIGATRAN ETEXILATE MESYLATE    | 0.862272058 | 0.537484844 | 0.541688631 | 0.117790771 |
| beta-ESCCIN                      | 0.862025695 | 0.21647267  | 0.400251359 | 1.204877637 |
| ABAMECTIN (avermectin B1a shown) | 0.861300206 | 0.176436072 | 0.151946952 | 0.953745059 |
| HYDROXYUREA                      | 0.861294644 | 0.568085459 | 0.486062067 | 1.723598443 |
| CARPROFEN                        | 0.861097998 | 0.041128746 | 0.024939995 | 1.407993731 |
| FENIPENTOL                       | 0.861051102 | 0.095483098 | 0.209370404 | 1.264780558 |
| BECLAMIDE                        | 0.860857706 | 0.019911961 | 0.461052379 | 1.298158972 |
| DIPHENYLPYRALINE HYDROCHLORIDE   | 0.860714838 | 0.069056578 | 0.249381667 | 1.068658871 |
| QUETIAPINE                       | 0.859602662 | 0.142255824 | 0.287009147 | 1.298710406 |
| PARGYLINE HYDROCHLORIDE          | 0.857159563 | 0.119059849 | 0.42958189  | 1.03499757  |
| LINDANE                          | 0.857077566 | 0.089926955 | 0.09357561  | 0.887700355 |
| CHENODIOL                        | 0.857071242 | 0.108112963 | 0.216321136 | 1.412070306 |
| TILETAMINE HYDROCHLORIDE         | 0.856350223 | 0.065522092 | 0.25525043  | 1.123926525 |
| QUINESTROL                       | 0.855944327 | 0.134016609 | 0.42827926  | 1.261014132 |
| ALCLOMETAZONE DIPROPIONATE       | 0.855742007 | 0.212702198 | 0.305056607 | 1.70131261  |
| PROCODAZOLE                      | 0.855330063 | 0.234980551 | 0.385417992 | 0.988272055 |
| SUXIBUZONE                       | 0.855255258 | 0.078778094 | 0.187497727 | 1.070243978 |
| MINOXIDIL                        | 0.854892034 | 0.243682322 | 0.21206959  | 1.241630802 |
| TOLFENAMIC ACID                  | 0.854852044 | 0.060431682 | 0.18198181  | 1.456837219 |
| AMINOHYDROXYBUTYRIC ACID         | 0.854631407 | 0.168249222 | 0.221512744 | 1.045115837 |
| CARBENOXOLONE SODIUM             | 0.854408955 | 0.117219695 | 0.420749922 | 1.698668879 |
| TROXERUTIN                       | 0.853991908 | 0.02387806  | 0.174283941 | 1.036445214 |
| CLONIDINE HYDROCHLORIDE          | 0.853921496 | 0.023355264 | 0.222243869 | 1.437775384 |
| PROPYLTHIOURACIL                 | 0.853863988 | 0.127880136 | 0.104144234 | 1.272968242 |
| HYDROCORTISONE PHOSPHATE TRIETHY | 0.853843829 | 0.437317982 | 0.377853284 | 1.445812245 |
| MESTRANOL                        | 0.853788406 | 0.113970171 | 0.288583429 | 1.487443991 |
| NIACINAMIDE                      | 0.853729513 | 0.281069846 | 0.40942971  | 1.417624388 |
| DROPROPIZINE                     | 0.852877287 | 0.220790805 | 0.372477735 | 1.23740186  |
| ZINC UNDECYLENATE                | 0.852816921 | 0.049096584 | 0.074030899 | 1.259538334 |
| ISOFLUPREDONE ACETATE            | 0.852709728 | 0.29082131  | 0.497178679 | 1.336913327 |
| DEFERIPRONE                      | 0.852036511 | 0.059350324 | 0.435832048 | 1.082131905 |
| PICOLAMINE                       | 0.851774315 | 0.057559364 | 0.328191031 | 0.957169407 |
| THIOTEPA                         | 0.851695166 | 0.206578673 | 0.239287375 | 1.759814046 |
| BUCETIN                          | 0.851408673 | 0.049316727 | 0.319321069 | 1.184686232 |
| SIROLIMUS                        | 0.851198667 | 0.150593153 | 0.208827199 | 1.331914983 |
| CRESOL                           | 0.8511274   | 0.050752416 | 0.071581708 | 1.676057358 |
| PYRONARIDINE TETRAPHOSPHATE      | 0.850662143 | 0.13268429  | 0.331956206 | 1.363640278 |
| BEZAFIBRATE                      | 0.850251977 | 0.276991115 | 0.397177804 | 1.657763133 |
| DIXANTHOGEN                      | 0.849847298 | 0.155407843 | 0.341896269 | 1.053955748 |
| SULFAMETER                       | 0.84891241  | 0.169746913 | 0.356258564 | 1.713078208 |
| BENAZEPRIL HYDROCHLORIDE         | 0.848421314 | 0.262298744 | 0.330686686 | 1.500876967 |
| DIFLORASONE DIACETATE            | 0.848121581 | 0.166945732 | 0.353063112 | 1.235768933 |
| BALSALAZIDE DISODIUM             | 0.847806853 | 0.196366288 | 0.158950399 | 1.212752183 |
| ACIPIMOX                         | 0.847762526 | 0.110283876 | 0.324445043 | 1.227754993 |
| DAPTOMYCIN (5 millimolar/DMSO)   | 0.847388772 | 0.083818273 | 0.262106052 | 1.345472808 |
| ETHIONAMIDE                      | 0.847084271 | 0.323163678 | 0.272899407 | 1.354198359 |
| PRASTERONE                       | 0.84618505  | 0.147914105 | 0.429228489 | 1.463912468 |
| PIPOBROMAN                       | 0.845877955 | 0.067409373 | 0.166303124 | 1.408578866 |
| OXCARBAZEPINE                    | 0.845550606 | 0.059145252 | 0.222480588 | 1.324926961 |
| HYDROXYTOLUIC ACID               | 0.844837465 | 0.161417197 | 0.322264151 | 1.015056163 |
| TRIHENYPHENIDYL HYDROCHLORIDE    | 0.844507649 | 0.198781396 | 0.221191742 | 1.481372462 |
| PICONOL                          | 0.844436809 | 0.175545008 | 0.331537194 | 0.949835258 |
| HYDROXYZINE PAMOATE              | 0.844391253 | 0.422271075 | 0.338243378 | 1.588739024 |
| BUSPIRONE HYDROCHLORIDE          | 0.84381711  | 0.128472789 | 0.073236164 | 1.33904321  |
| MEPHENESIN                       | 0.841603839 | 0.132867536 | 0.324944756 | 1.304586328 |
| NITHIAMIDE                       | 0.840053006 | 0.076742755 | 0.158205955 | 1.345804404 |

|                                  |             |             |             |             |
|----------------------------------|-------------|-------------|-------------|-------------|
| METHOXAMINE HYDROCHLORIDE        | 0.839992692 | 0.102715751 | 0.094561764 | 1.168624095 |
| NEFIRACETAM                      | 0.839618662 | 0.076991655 | 0.294584041 | 1.079223996 |
| PIMAGEDINE HYDROCHLORIDE         | 0.839108274 | 0.102769494 | 0.166547655 | 1.528391258 |
| OXTRIPHYLLINE                    | 0.838204921 | 0.155561175 | 0.407806051 | 0.970764487 |
| PARACHLOROPHENOL                 | 0.838124275 | 0.165243272 | 0.094058848 | 1.083461362 |
| LUMIRACOXIB                      | 0.837612477 | 0.117555101 | 0.209256237 | 1.310450965 |
| ALMOTRIPTAN                      | 0.836937954 | 0.091771381 | 0.365554573 | 1.528722993 |
| GLYBURIDE                        | 0.836785739 | 0.175176025 | 0.216063894 | 1.005639113 |
| LEVONORDEFRIN                    | 0.836371867 | 0.724532295 | 0.500300586 | 2.046825044 |
| CLORGILINE HYDROCHLORIDE         | 0.836330125 | 0.100711967 | 0.394338116 | 1.39742367  |
| CLINDAMYCIN HYDROCHLORIDE        | 0.836173183 | 0.055518122 | 0.178552499 | 1.328293037 |
| IPRONIAZID SULFATE               | 0.835504043 | 0.243032525 | 0.41944132  | 1.520604582 |
| ETHINYL ESTRADIOL                | 0.834644267 | 0.587143049 | 0.420419784 | 1.859702697 |
| meta-CRESYL ACETATE              | 0.832651306 | 0.212883528 | 0.404331953 | 1.15196618  |
| ECONAZOLE NITRATE                | 0.832235715 | 0.093815385 | 0.222677787 | 1.39094915  |
| NALBUPHINE HYDROCHLORIDE         | 0.831459503 | 0.031760015 | 0.345163764 | 1.356496982 |
| GENTAMICIN SULFATE               | 0.831101084 | 0.475744989 | 0.338284587 | 1.593783706 |
| COUMARIN                         | 0.830750159 | 0.237323303 | 0.314160594 | 1.150944071 |
| DICLOFENAC SODIUM                | 0.830609873 | 0.087476017 | 0.171564338 | 1.269292925 |
| TRIMETOZINE                      | 0.82970242  | 0.253770871 | 0.250738774 | 1.263567859 |
| TRIAMCINOLONE                    | 0.82794017  | 0.031901052 | 0.128473129 | 1.268524699 |
| ESZOPICLONE                      | 0.827808488 | 0.088502022 | 0.39101431  | 1.03489734  |
| CARBIMAZOLE                      | 0.827142957 | 0.126096413 | 0.269987077 | 0.954231038 |
| BUFLOMEDIL HYDROCHLORIDE         | 0.826900669 | 0.102743204 | 0.368959893 | 1.361337949 |
| DIPERODON HYDROCHLORIDE          | 0.826787985 | 0.191671793 | 0.403640503 | 1.291336645 |
| ETHOXZOLAMIDE                    | 0.825212664 | 0.11361868  | 0.136020944 | 1.448549527 |
| GALLAMINE TRIETHIODIDE           | 0.824295568 | 0.388861906 | 0.258723845 | 1.451140266 |
| PHENETHICILLIN POTASSIUM         | 0.824257558 | 0.188061637 | 0.074116166 | 1.278748515 |
| DEXAMETHASONE                    | 0.824101472 | 0.085047068 | 0.156631687 | 1.396272021 |
| LOXOPROFEN                       | 0.823989911 | 0.2791946   | 0.204871292 | 1.094008315 |
| ARMODAFINIL                      | 0.823118859 | 0.199864521 | 0.292966883 | 1.478407236 |
| HYDRASTININE HYDROCHLORIDE       | 0.82279916  | 0.187212842 | 0.372516371 | 1.211118729 |
| CHLOROXINE                       | 0.822719885 | 0.155220044 | 0.056550596 | 1.035475527 |
| NADOLOL                          | 0.821685834 | 0.262397856 | 0.193648047 | 1.479938564 |
| XYLAZINE                         | 0.820973183 | 0.122290748 | 0.266788926 | 1.740034421 |
| METHYLPREDNISOLONE SODIUM SUCCIN | 0.820822403 | 0.048257001 | 0.234907691 | 1.260970227 |
| CINCHOPHEN                       | 0.820570082 | 0.080214589 | 0.34993398  | 1.149772182 |
| ETHYL VANILLIN                   | 0.819864438 | 0.214435825 | 0.111592598 | 1.16016212  |
| PHENOXYBENZAMINE HYDROCHLORIDE   | 0.816686498 | 0.099802852 | 0.01139297  | 1.51209587  |
| RANITIDINE HYDROCHLORIDE         | 0.816525261 | 0.080670388 | 0.1829794   | 1.317693218 |
| TROSPIMUM CHLORIDE               | 0.816440019 | 0.195060176 | 0.076125603 | 1.359667729 |
| ZOXAZOLAMINE                     | 0.815063035 | 0.10358398  | 0.184318657 | 1.067481735 |
| LORGLUMIDE SODIUM                | 0.814859098 | 0.147369731 | 0.238573508 | 1.153237327 |
| CARVEDILOL                       | 0.814751076 | 0.171735851 | 0.178714433 | 1.589846402 |
| FLUOROURACIL                     | 0.813281378 | 0.727043691 | 0.444715738 | 2.00419055  |
| PROPRANOLOL HYDROCHLORIDE (+/-)  | 0.812911852 | 0.062348271 | 0.237657963 | 1.232942834 |
| ASPARTAME                        | 0.812563274 | 0.248362797 | 0.283282185 | 1.535247031 |
| PHENOTHIRIN                      | 0.812563082 | 0.287076275 | 0.287388879 | 1.237506224 |
| AMBROXOL HYDROCHLORIDE           | 0.810937597 | 0.029773407 | 0.322433798 | 1.307409992 |
| ERYTHROMYCIN                     | 0.810716132 | 0.582899911 | 0.320772299 | 0.068954203 |
| DEXAMETHASONE ACETATE            | 0.810710753 | 0.087107142 | 0.13074706  | 1.451543949 |
| ARTENIMOL                        | 0.810424329 | 0.038989413 | 0.321579053 | 1.303271806 |
| ELLAGIC ACID                     | 0.810231446 | 0.133466895 | 0.107199917 | 0.984069453 |
| ALLYLTHIOUREA                    | 0.808393303 | 0.045125179 | 0.212276729 | 1.149973978 |
| NIMESULIDE                       | 0.808086577 | 0.119699701 | 0.323731591 | 1.276723396 |
| PIROXICAM                        | 0.807737403 | 0.065936252 | 0.132734985 | 1.45556743  |
| THIRAM                           | 0.807333934 | 0.056911144 | 0.026778887 | 2.064039559 |
| RAMIFENAZONE                     | 0.806379462 | 0.110005902 | 0.094526166 | 1.173938287 |
| LANSOPRAZOLE                     | 0.805781615 | 0.236396363 | 0.146499157 | 1.855221468 |
| RAMELTEON                        | 0.805734369 | 0.126234199 | 0.231532417 | 1.568592822 |
| DROPERIDOL                       | 0.805155295 | 0.152554387 | 0.115233713 | 1.390609728 |
| FLUNISOLIDE                      | 0.804106352 | 0.043437834 | 0.216109319 | 1.264433101 |
| NAFTOPIDIL                       | 0.804048922 | 0.073099291 | 0.308735245 | 1.329862283 |
| AZACITIDINE                      | 0.803374015 | 0.031982722 | 0.326243961 | 1.382045221 |
| EUGENOL                          | 0.802917315 | 0.359347637 | 0.189169854 | 1.441397298 |
| VORINOSTAT                       | 0.800765815 | 0.188728436 | 0.236320394 | 1.413152862 |
| ARTESUNATE                       | 0.799091433 | 0.264135043 | 0.257892563 | 1.501400111 |
| METRONIDAZOLE                    | 0.798996974 | 0.14572417  | 0.053729082 | 1.216916809 |
| TILORONE                         | 0.798938964 | 0.047627045 | 0.205471028 | 1.139779034 |
| OXYTETRACYCLINE                  | 0.798454046 | 0.078833067 | 0.267047361 | 1.268490368 |
| TRICHLORMETHINE HYDROCHLORIDE    | 0.798189966 | 0.139533729 | 0.199890818 | 1.194648652 |
| TENOXICAM                        | 0.794879253 | 0.168975514 | 0.035825256 | 1.474167311 |

|                                 |             |             |             |             |
|---------------------------------|-------------|-------------|-------------|-------------|
| CHLORZOAZONE                    | 0.793857777 | 0.092334633 | 0.104212416 | 1.25808357  |
| PREGNENOLONE                    | 0.792926145 | 0.050741438 | 0.180886028 | 1.685751145 |
| TRIAMCINOLONE DIACETATE         | 0.792121657 | 0.291132533 | 0.154604614 | 1.446839659 |
| CYSTEAMINE HYDROCHLORIDE        | 0.792090135 | 0.198768668 | 0.144997854 | 1.30794725  |
| FOSCARNET SODIUM                | 0.791814792 | 0.028328606 | 0.012497892 | 1.379700043 |
| CARBIDOPA                       | 0.79143457  | 0.268553404 | 0.232343229 | 1.03067122  |
| GEMFIBROZIL                     | 0.791144306 | 0.431043214 | 0.212563947 | 1.526800951 |
| ACETARSOL                       | 0.790921179 | 0.252306102 | 0.225156536 | 1.283816437 |
| TOLNAFTATE                      | 0.790620563 | 0.081676857 | 0.004182235 | 1.655897092 |
| PREDNISOLONE SODIUM PHOSPHATE   | 0.789401459 | 0.225506146 | 0.116208598 | 1.216380119 |
| BENZOCLIDINE                    | 0.788831849 | 0.388827031 | 0.278361675 | 1.021066437 |
| EPRODISATE DISODIUM             | 0.787952972 | 0.221263223 | 0.109851542 | 1.428437809 |
| DIAPERIDINE                     | 0.787377439 | 0.065940927 | 0.184292205 | 1.597089846 |
| CROTAMITON                      | 0.786046569 | 0.110224152 | 0.187962688 | 1.213142612 |
| TRIAMCINOLONE ACETONIDE         | 0.786004882 | 0.161872756 | 0.090183708 | 1.449882734 |
| ASCORBYL PALMITATE              | 0.785730031 | 0.185237604 | 0.204276647 | 1.408497205 |
| d-LIMONENE                      | 0.785439554 | 0.111626885 | 0.175053768 | 1.073998081 |
| PROCAINE HYDROCHLORIDE          | 0.783839233 | 0.131820198 | 0.107593299 | 1.522707232 |
| LEVODOPA                        | 0.782898666 | 0.301012825 | 0.062020168 | 1.532663596 |
| MECYSTEINE HYDROCHLORIDE        | 0.782817892 | 0.215955266 | 0.285575194 | 1.678830616 |
| MONTELUKAST SODIUM              | 0.781706813 | 0.125216949 | 0.1068387   | 0.96498856  |
| CYTARABINE                      | 0.780578036 | 0.19621788  | 0.113153888 | 0.81595583  |
| TRICHLORMETHIAZIDE              | 0.779338103 | 0.246344212 | 0.112493754 | 1.398751572 |
| PROTIONAMIDE                    | 0.778956953 | 0.048952372 | 0.052759481 | 1.202076623 |
| METHAZOLAMIDE                   | 0.777321902 | 0.05865823  | 0.055442002 | 1.547168454 |
| TIRATRICOL                      | 0.776735699 | 0.101342995 | 0.158035993 | 1.183235813 |
| IRINOTECAN HYDROCHLORIDE        | 0.774319866 | 0.341918617 | 0.228068513 | 0.906087508 |
| UREA                            | 0.773013389 | 0.13086742  | 0.067050537 | 1.703103858 |
| PHENYLMERCURIC ACETATE          | 0.772308611 | 0.186292805 | 0.031608249 | 0.084018667 |
| ORBIFLOXACIN                    | 0.771821179 | 0.059881314 | 0.239160481 | 1.153278583 |
| ALISKIREN HEMIFUMARATE          | 0.770540411 | 0.138231039 | 0.064230202 | 0.987424023 |
| BENZOCAINE                      | 0.770062623 | 0.014317383 | 0.018623553 | 0.958695526 |
| ITOPRIDE HYDROCHLORIDE          | 0.768356262 | 0.205254184 | 0.254147364 | 1.521713889 |
| TRANEXAMIC ACID                 | 0.767441639 | 0.145560927 | 0.162015046 | 2.05552886  |
| FENACLON                        | 0.767266123 | 0.170615987 | 0.156579743 | 1.042224817 |
| GATIFLOXACIN                    | 0.767009928 | 0.133964983 | 0.089720418 | 1.125774893 |
| WARFARIN                        | 0.766724786 | 0.018357478 | 0.009230035 | 1.256479586 |
| ATENOLOL                        | 0.766320068 | 0.30712267  | 0.08507776  | 0.9894169   |
| CHLOROXYLENOL                   | 0.765618789 | 0.148846719 | 0.080371067 | 1.223075009 |
| NABUMETONE                      | 0.764282985 | 0.138403791 | 0.056508248 | 1.406258545 |
| NAPROXEN(+)                     | 0.763267024 | 0.126667917 | 0.024421622 | 1.375954131 |
| FUROSEMIDE                      | 0.762084321 | 0.539893452 | 0.225970286 | 1.687219069 |
| DEXAMETHASONE SODIUM PHOSPHATE  | 0.762062628 | 0.028230112 | 0.060207322 | 1.379128116 |
| FORMESTANE                      | 0.759260093 | 0.152023074 | 0.139996575 | 1.55656524  |
| NALTREXONE HYDROCHLORIDE        | 0.757786237 | 0.179700744 | 0.060595051 | 1.657787159 |
| CHLORAMINE-T                    | 0.757675378 | 0.018627578 | 0.211436396 | 1.072803388 |
| MILTEFOSINE                     | 0.757042378 | 0.302345121 | 0.258043898 | 1.312474801 |
| TRIFLURIDINE                    | 0.755402228 | 0.257218269 | 0.111728595 | 1.099953455 |
| THYMOPENTIN                     | 0.755391936 | 0.213186868 | 0.065211683 | 0.994093426 |
| MELPHALAN                       | 0.753685176 | 0.390073786 | 0.112923775 | 1.270180436 |
| CARMOFUR                        | 0.753375973 | 0.04505991  | 0.033991679 | 1.27769623  |
| CARGLUMIC ACID                  | 0.753217277 | 0.112341915 | 0.124196589 | 1.05829178  |
| METAPROTERENOL                  | 0.753162114 | 0.038173771 | 0.012989674 | 1.450781164 |
| METHOXSALLEN                    | 0.751636811 | 0.38739635  | 0.120606953 | 1.443187889 |
| ALAPROCLATE                     | 0.7480137   | 0.25188193  | 0.073525815 | 1.366615838 |
| NICORANDIL                      | 0.745126004 | 0.078536417 | 0.104934207 | 0.978715802 |
| FLUMETHAZONE PIVALATE           | 0.744386625 | 0.36308158  | 0.099371014 | 1.26618459  |
| RACECADOTRIL                    | 0.740548882 | 0.080120748 | 0.104151358 | 1.000314037 |
| PHENYTOIN SODIUM                | 0.740323295 | 0.02727998  | 0.157714469 | 1.315017826 |
| MIGLITOL                        | 0.739208693 | 0.168376172 | 0.068380119 | 1.003397801 |
| TRIMETHOBENZAMIDE HYDROCHLORIDE | 0.73884198  | 0.077549343 | 0.000916597 | 1.923166355 |
| HYDROCORTISONE BUTYRATE         | 0.738149115 | 0.198772967 | 0.04968396  | 1.723705592 |
| FASUDIL HYDROCHLORIDE           | 0.73648055  | 0.082331693 | 0.095455135 | 0.913591094 |
| CLOFARABINE                     | 0.728508615 | 0.328948682 | 0.058643745 | 1.237582213 |
| ENOXOLONE                       | 0.728226972 | 0.21519678  | 0.044683102 | 1.037766    |
| MEPARFYLON                      | 0.726402383 | 0.057603472 | 0.086993691 | 1.003802034 |
| OXOLAMINE CITRATE               | 0.723168968 | 0.088891329 | 0.161996897 | 1.467353827 |
| OMEPRAZOLE                      | 0.721479709 | 0.131066262 | 0.141107195 | 1.709955607 |
| SODIUM NITROPRUSSIDE            | 0.721287204 | 0.075942606 | 0.041987909 | 1.208586346 |
| CARNITINE (dl) HYDROCHLORIDE    | 0.720351589 | 0.053353943 | 0.077084312 | 1.08926939  |
| DINITOLMIDE                     | 0.712694219 | 0.103202949 | 0.078181634 | 1.063414044 |
| DYPHYLLINE                      | 0.712273528 | 0.046850846 | 0.028918464 | 1.148288775 |

|                                 |             |             |             |             |
|---------------------------------|-------------|-------------|-------------|-------------|
| REBAMIPIDE                      | 0.712004419 | 0.258225898 | 0.103314467 | 0.958736391 |
| LOFEXIDINE HYDROCHLORIDE        | 0.711327218 | 0.077175124 | 0.082429258 | 1.221104463 |
| URSODIOL                        | 0.710275025 | 0.097622813 | 0.02241185  | 1.617892899 |
| PROPOXYCAINE HYDROCHLORIDE      | 0.705139321 | 0.146751069 | 0.009472484 | 1.309529174 |
| BUMETANIDE                      | 0.702114558 | 0.418670938 | 0.093530164 | 1.676241802 |
| VECURONIUM BROMIDE              | 0.701296798 | 0.149889949 | 0.023304478 | 0.952574918 |
| SOLIFENACIN SUCCINATE           | 0.696992714 | 0.138493137 | 0.007605051 | 1.411974451 |
| D-PHENYLALANINE                 | 0.696348228 | 0.10697016  | 0.015720439 | 1.233842419 |
| BENZOXIQUINE                    | 0.695837373 | 0.068104006 | 0.028731522 | 0.861428252 |
| NOMIFENSINE MALEATE             | 0.695105408 | 0.067256981 | 0.142037516 | 1.172769059 |
| ACEDOBEN                        | 0.693566725 | 0.178407889 | 0.069445281 | 1.283909956 |
| BROXYQUINOLINE                  | 0.693560601 | 0.176822598 | 0.07234842  | 0.826244102 |
| SULFACARBAMIDE                  | 0.691967748 | 0.068254028 | 0.059009652 | 0.990043438 |
| DULOXETINE HYDROCHLORIDE        | 0.688669351 | 0.085693938 | 0.026904258 | 1.21120575  |
| SALINOMYCIN, SODIUM             | 0.688120168 | 0.157880473 | 0.127079903 | 1.65168618  |
| ACENEURAMIC ACID                | 0.685837149 | 0.024571687 | 0.114257669 | 1.381196773 |
| FEXOFENADINE HYDROCHLORIDE      | 0.679929238 | 0.199503671 | 0.03534053  | 1.190401777 |
| SULFAMETHOXYPIRIDAZINE          | 0.678320221 | 0.104550796 | 0.059043918 | 1.456825405 |
| CHLORMIDAZOLE                   | 0.677200632 | 0.083241173 | 0.108391757 | 1.604676924 |
| PYRVINIUM PAMOATE               | 0.672698684 | 0.072142283 | 0.019497124 | 1.939314524 |
| OCTOCRYLENE                     | 0.672142872 | 0.229398278 | 0.062939052 | 1.294284966 |
| CHLORINDIONE                    | 0.670629801 | 0.177188985 | 0.053596125 | 1.234058765 |
| NEFAZODONE HYDROCHLORIDE        | 0.670455262 | 0.133748482 | 0.056790058 | 1.114696998 |
| SULFADIMETHOXINE                | 0.66705183  | 0.204829934 | 0.063969865 | 1.193830278 |
| DEXLANSOPRAZOLE                 | 0.661462278 | 0.172561912 | 0.005480651 | 1.441651758 |
| ISOBUTAMBEN                     | 0.660027267 | 0.19154272  | 0.006451359 | 0.352038776 |
| ERGONOVINE MALEATE              | 0.659779678 | 0.471708888 | 0.062500401 | 1.746312543 |
| SULFAMONOMETHOXINE              | 0.656107552 | 0.046260352 | 0.043001919 | 1.234977592 |
| BEPHENIUM HYDROXYNAPTHOATE      | 0.655623433 | 0.061580658 | 0.101732238 | 1.145613769 |
| COUMOPHOS                       | 0.652143804 | 0.26257175  | 0.058841475 | 1.754030752 |
| RETINYL ACETATE                 | 0.645236639 | 0.166508464 | 0.009678447 | 1.31155368  |
| CAPECITABINE                    | 0.636477298 | 0.025188871 | 0.033873729 | 1.513330556 |
| TRIFLUOPERAZINE HYDROCHLORIDE   | 0.635247597 | 0.297632796 | 0.023207105 | 1.715323123 |
| DOCETAXEL                       | 0.63094696  | 0.049806212 | 0.032283737 | 1.567842204 |
| METYRAPONE                      | 0.625769518 | 0.080304493 | 0.027505679 | 1.065839148 |
| LEVOTHYROXINE                   | 0.621420434 | 0.172700299 | 0.013643713 | 1.514259411 |
| COLFORSIN                       | 0.61128351  | 0.159753035 | 0.005982498 | 2.360281253 |
| IBANDRONATE SODIUM              | 0.601897526 | 0.074631211 | 0.000796546 | 1.138459051 |
| MESALAMINE                      | 0.58992983  | 0.073967875 | 0.002699096 | 1.555896935 |
| ZOLMITRIPTAN                    | 0.576456934 | 0.083963054 | 0.017986088 | 1.451961846 |
| BROXALDINE                      | 0.575683393 | 0.124767207 | 0.044918954 | 0.917280453 |
| SPIPERONE                       | 0.566409261 | 0.050398007 | 9.80149E-05 | 0.95172571  |
| ANCITABINE HYDROCHLORIDE        | 0.543970225 | 0.01733977  | 0.008998047 | 0.866920358 |
| BURAMATE                        | 0.539563671 | 0.054007375 | 0.004642774 | 1.01416341  |
| TRICLOSAN                       | 0.516770857 | 0.146135334 | 0.001456693 | 1.003406882 |
| TRETINOIN                       | 0.516012049 | 0.079280292 | 0.030139014 | 1.229501748 |
| LIOTHYRONINE (L- isomer) SODIUM | 0.511877182 | 0.144803425 | 0.000121932 | 1.287246541 |
| OXIBENDAZOLE                    | 0.499023992 | 0.146291147 | 0.001068079 | 3.974572354 |
| TRIAMTERENE                     | 0.489763545 | 0.246554611 | 0.00243009  | 1.848366525 |
| TETRACAINE HYDROCHLORIDE        | 0.486654776 | 0.025880773 | 0.001288614 | 1.535695975 |
| ESOMEPRAZOLE POTASSIUM          | 0.465027851 | 0.051306948 | 0.010563125 | 1.328084433 |
| DOCOSANOL                       | 0.448609489 | 0.05960253  | 0.004079645 | 2.749552856 |
| CINROMIDE                       | 0.444429597 | 0.050439909 | 0.000849926 | 1.25856418  |
| NIFUROXAZIDE                    | 0.442503838 | 0.064617066 | 0.012130346 | 1.77583017  |
| CHLORAZANIL HYDROCHLORIDE       | 0.416876135 | 0.097563891 | 0.009924319 | 1.049481206 |
| SALICYLANILIDE                  | 0.416378103 | 0.048814897 | 6.86769E-07 | 0.515732301 |
| beta-NAPHTHOL                   | 0.414653766 | 0.169300991 | 0.011089776 | 1.043760508 |
| INDOPROFEN                      | 0.389718994 | 0.741739767 | 0.028550397 | 1.680445955 |
| ABACAVIR SULFATE                | 0.376905954 | 0.225632148 | 0.000147952 | 1.124916899 |
| EPIRUBICIN HYDROCHLORIDE        | 0.376371119 | 0.354020104 | 0.001711687 | 0.071879464 |
| LIOTHYRONINE                    | 0.371394723 | 0.092289234 | 7.78983E-07 | 1.394216971 |
| ALBENDAZOLE                     | 0.360938647 | 0.075955602 | 0.000125593 | 3.649616415 |
| HEXETIDINE                      | 0.331255576 | 0.20285006  | 0.00018766  | 0.05505182  |
| SEMUSTINE                       | 0.325258744 | 0.222711117 | 0.000236576 | 1.594468399 |
| SANGUINARINE SULFATE            | 0.317377073 | 0.263423562 | 0.000123897 | 1.625130308 |
| DIFLUNISAL                      | 0.284796616 | 0.116471704 | 0.000115913 | 1.153925612 |
| NIFURSOL                        | 0.279129461 | 0.128613218 | 5.02812E-06 | 1.087063566 |
| THIABENDAZOLE                   | 0.278334151 | 0.013700933 | 1.64423E-06 | 0.649239346 |
| MEBENDAZOLE                     | 0.274401842 | 0.175616745 | 2.01709E-05 | 2.980830602 |
| LEFLUNOMIDE                     | 0.243229498 | 0.054202967 | 0.001263113 | 1.096543994 |
| MELOXICAM SODIUM                | 0.242457506 | 0.091955777 | 9.1064E-05  | 1.397485554 |
| PHENAZOPYRIDINE HYDROCHLORIDE   | 0.234299155 | 0.103053254 | 0.001261914 | 0.321139386 |

|                           |              |             |             |             |
|---------------------------|--------------|-------------|-------------|-------------|
| TOLONIUM CHLORIDE         | 0.227776552  | 0.036125539 | 1.62411E-05 | 0.571313178 |
| PHENELZINE SULFATE        | 0.212324693  | 0.094927603 | 0.00101919  | 1.624715936 |
| MEPHENTERMINE SULFATE     | 0.209005935  | 0.097092465 | 2.037E-05   | 1.726746216 |
| ANISINDIONE               | 0.205557894  | 0.010025995 | 8.84425E-05 | 0.891600635 |
| PIPERINE                  | 0.172792954  | 0.180410706 | 3.30393E-05 | 1.187851515 |
| NIFLUMIC ACID             | 0.165075091  | 0.068518639 | 9.33816E-06 | 0.939680038 |
| BROMINDIONE               | 0.159500399  | 0.120101966 | 1.55062E-05 | 1.163377248 |
| IPRIFLAVONE               | 0.153528274  | 0.173412252 | 1.96009E-05 | 0.934820563 |
| NITAZOXANIDE              | 0.145469691  | 0.115092872 | 3.77956E-05 | 0.399063421 |
| EXALAMIDE                 | 0.141933212  | 0.049918983 | 6.73557E-06 | 1.54032908  |
| HYDRALAZINE HYDROCHLORIDE | 0.138763231  | 0.781757707 | 0.006253376 | 1.521085027 |
| TRANILAST                 | 0.138060212  | 0.082439945 | 3.10791E-07 | 1.404364371 |
| DICUMAROL                 | 0.121070953  | 0.029185856 | 1.4317E-05  | 1.15622099  |
| NAFCILLIN SODIUM          | 0.096472104  | 0.044070947 | 4.81641E-06 | 1.981133344 |
| FEBUXOSTAT                | 0.083987719  | 0.023669527 | 2.72254E-05 | 1.193105491 |
| METHYLENE BLUE            | 0.015467107  | 0.012883039 | 2.28006E-06 | 0.81696441  |
| FLUFENAMIC ACID           | -0.028087744 | 0.169182945 | 8.02884E-07 | 1.18307401  |
| TENATOPRAZOLE             | -0.048159476 | 0.110107952 | 2.79489E-05 | 1.347244967 |
| NICLOSAMIDE               | -0.060898972 | 0.047859798 | 1.13322E-06 | 0.471417873 |
| TENYLIDONE                | -0.062036818 | 0.129179601 | 3.05585E-05 | 1.152349514 |



| Compound<br>(10 $\mu$ M) | CBR:CBG Ratio<br>(Relative to DMSO) | P-Value               |
|--------------------------|-------------------------------------|-----------------------|
| Methylene Blue           | 0.02                                | 2.28x10 <sup>-6</sup> |
| Febuxostat               | 0.08                                | 2.75x10 <sup>-5</sup> |
| Nafcillin Sodium         | 0.10                                | 4.82x10 <sup>-6</sup> |
| Dicumarol                | 0.12                                | 1.43x10 <sup>-5</sup> |
| Tranilast                | 0.14                                | 3.11x10 <sup>-7</sup> |
| Exalamide                | 0.14                                | 6.74x10 <sup>-6</sup> |
| Nitazoxanide             | 0.15                                | 3.78x10 <sup>-5</sup> |
| Ipriflavone              | 0.15                                | 1.96x10 <sup>-5</sup> |
| Bromindione              | 0.16                                | 1.55x10 <sup>-5</sup> |
| Niflumic Acid            | 0.17                                | 9.34x10 <sup>-6</sup> |
| Piperine                 | 0.17                                | 3.30x10 <sup>-5</sup> |
| Anisindione              | 0.21                                | 8.84x10 <sup>-5</sup> |
| Mephentermine Sulfate    | 0.21                                | 2.04x10 <sup>-5</sup> |
| Phenelzine Sulfate       | 0.21                                | 1.02x10 <sup>-3</sup> |

**Supplementary Table 3. Candidate NMD enhancers that passed quartile analysis**
